# Supplementary material for: Transcriptome Analysis of Ovary Development in Nile Tilapia Under Different Photoperiod Regimes
Source: Front Genet. 2019 Sep 19;10:894. doi: 10.3389/fgene.2019.00894 (PMC6761324; doi:10.3389/fgene.2019.00894)
Supplement: Supplementary Table 1 — Detailed information of the differentially expressed genes in the three groups. [file Table_1.xlsx]

## Sheet: LL_vs_DD.DEG.final
#ID	T01_Count	T02_Count	T01_FPKM	T02_FPKM	FDR	log2FC	regulated	COG_class	COG_class_annotation	GO_annotation	KEGG_annotation	KEGG_pathway	Swiss-Prot_annotation	eggNOG_class	eggNOG_class_annotation	NR_annotation
LOC100711950	289	144	2.52134	1.38958	0.00212913	-1.04553	down	--	--	Molecular Function: kinase activity (GO:0016301);; Biological Process: phosphorylation (GO:0016310);; Biological Process: phosphatidylinositol metabolic process (GO:0046488);;	K00889|0|mze:101479988|phosphatidylinositol 4-phosphate 5-kinase type-1 alpha-like; K00889 1-phosphatidylinositol-4-phosphate 5-kinase [EC:2.7.1.68] (A)	ko00562:Inositol phosphate metabolism;ko04070:Phosphatidylinositol signaling system;ko04144:Endocytosis;ko04810:Regulation of actin cytoskeleton	Phosphatidylinositol 4-phosphate 5-kinase type-1 beta GN=PIP5K1B OS=Gallus gallus (Chicken) PE=2 SV=1	T	Signal transduction mechanisms	PREDICTED: phosphatidylinositol 4-phosphate 5-kinase type-1 alpha-like [Oreochromis niloticus]
spock3	362	146	5.37573	2.30497	2.27289e-06	-1.34912	down	--	--	Molecular Function: calcium ion binding (GO:0005509);; Cellular Component: proteinaceous extracellular matrix (GO:0005578);; Biological Process: signal transduction (GO:0007165);;	K08136|0|mze:101473691|testican-3-like; K08136 sparc/osteonectin, cwcv and kazal-like domains proteoglycan (testican) (A)	--	SPARC (Precursor) GN=SPARC OS=Coturnix coturnix japonica (Japanese quail) PE=2 SV=1	R	General function prediction only	PREDICTED: testican-3-like isoform X1 [Oreochromis niloticus]
prlr	101	0	1.56892	0	0	-5.95318	down	--	--	Molecular Function: cytokine receptor activity (GO:0004896);; Cellular Component: integral component of membrane (GO:0016021);; Biological Process: cytokine-mediated signaling pathway (GO:0019221);; Molecular Function: metal ion binding (GO:0046872);;	K05081|0|mze:101477358|prolactin receptor-like; K05081 prolactin receptor (A)	ko04060:Cytokine-cytokine receptor interaction;ko04080:Neuroactive ligand-receptor interaction;ko04630:Jak-STAT signaling pathway	Prolactin receptor (Precursor) GN=prlr OS=Oreochromis niloticus (Nile tilapia) PE=2 SV=1	T	Signal transduction mechanisms	PREDICTED: prolactin receptor isoform X1 [Oreochromis niloticus]
LOC100693840	80	0	2.21847	0	0	-5.623	down	--	--	--	K04994|0|mze:101473080|mucolipin-3-like; K04994 mucolipin 3 (A)	--	Polycystin-2 GN=pkd2 OS=Oryzias latipes (Medaka fish) PE=1 SV=2	P	Inorganic ion transport and metabolism	PREDICTED: mucolipin-3-like [Oreochromis niloticus]
myo18b	195	477	1.24881	2.9173	1.11274e-05	1.23413	up	[Z]	Cytoskeleton	Molecular Function: motor activity (GO:0003774);; Molecular Function: ATP binding (GO:0005524);; Cellular Component: myosin complex (GO:0016459);;	K10362|0|mze:101481518|unconventional myosin-XVIIIb-like; K10362 myosin XVIII (A)	--	Myosin-11 GN=MYH11 OS=Gallus gallus (Chicken) PE=1 SV=4	Z	Cytoskeleton	PREDICTED: unconventional myosin-XVIIIb isoform X1 [Oreochromis niloticus]
LOC102082159	42	117	2.14201	6.41592	0.00145327	1.39386	up	--	--	--	--	--	Hepatic lectin OS=Gallus gallus (Chicken) PE=1 SV=1	V	Defense mechanisms	PREDICTED: C-type lectin domain family 4 member M-like [Oreochromis niloticus]
Tilapia_newGene_544	38	339	2.19475	24.375	0	3.05356	up	--	--	--	--	--	Ig mu chain C region membrane-bound form OS=Ictalurus punctatus (Channel catfish) PE=4 SV=1	R	General function prediction only	immunoglobulin heavy chain [Oreochromis niloticus]
pex7	193	406	6.05675	11.9249	0.00149929	1.01727	up	[R]	General function prediction only	Biological Process: neuron migration (GO:0001764);; Biological Process: endochondral ossification (GO:0001958);; Molecular Function: peroxisome matrix targeting signal-2 binding (GO:0005053);; Cellular Component: peroxisomal matrix (GO:0005782);; Cellular Component: cytosol (GO:0005829);; Biological Process: fatty acid beta-oxidation (GO:0006635);; Biological Process: ether lipid biosynthetic pro…	K13341|0|mze:101486146|peroxisomal targeting signal 2 receptor-like; K13341 peroxin-7 (A)	ko04146:Peroxisome	Histone-binding protein RBBP4 GN=rbbp4 OS=Danio rerio (Zebrafish) PE=2 SV=3	U	Intracellular trafficking, secretion, and vesicular transport	PREDICTED: peroxisomal targeting signal 2 receptor-like isoform X1 [Oreochromis niloticus]
LOC106097487	1	94	0.0900771	6.7079	0	5.12156	up	--	--	--	K06771|2.77348e-48|mze:101473469|myelin-associated glycoprotein-like; K06771 myelin associated glycoprotein (A)	ko04514:Cell adhesion molecules (CAMs)	--	129	Inorganic ion transport and metabolism	PREDICTED: uncharacterized protein LOC102076445 [Oreochromis niloticus]
LOC100701020	54	140	1.83829	5.06933	0.00160652	1.299	up	--	--	Biological Process: acyl-CoA metabolic process (GO:0006637);; Molecular Function: thiolester hydrolase activity (GO:0016790);;	K00659|6.26452e-105|tru:101071207|bile acid-CoA:amino acid N-acyltransferase-like; K00659 bile acid-CoA:amino acid N-acyltransferase [EC:2.3.1.65 3.1.2.2] (A)	ko00120:Primary bile acid biosynthesis;ko00430:Taurine and hypotaurine metabolism;ko01040:Biosynthesis of unsaturated fatty acids;ko04146:Peroxisome	--	R	General function prediction only	PREDICTED: acyl-coenzyme A thioesterase 4-like [Oreochromis niloticus]
LOC100708475	2129	4482	25.096	53.5835	0.000116635	1.02404	up	--	--	Molecular Function: calcium channel activity (GO:0005262);; Cellular Component: integral component of membrane (GO:0016021);; Biological Process: calcium ion transmembrane transport (GO:0070588);;	K04965|0|mze:101481304|short transient receptor potential channel 2-like; K04965 transient receptor potential cation channel subfamily C member 2 (A)	--	--	T	Signal transduction mechanisms	PREDICTED: short transient receptor potential channel 2-like [Oreochromis niloticus]
LOC100689947	221	65	13.4571	4.06481	9.05245e-09	-1.7881	down	--	--	Molecular Function: transforming growth factor beta-activated receptor activity (GO:0005024);; Biological Process: transmembrane receptor protein serine/threonine kinase signaling pathway (GO:0007178);; Cellular Component: membrane (GO:0016020);;	--	--	--	R	General function prediction only	PREDICTED: ly6/PLAUR domain-containing protein 2-like [Oreochromis niloticus]
LOC100700615	1350	551	20.2948	8.17748	2.69003e-08	-1.33948	down	--	--	--	K04853|0|ola:101171913|voltage-dependent L-type calcium channel subunit alpha-1F-like; K04853 voltage-dependent calcium channel L type alpha-1F (A)	ko04010:MAPK signaling pathway;ko04020:Calcium signaling pathway;ko04260:Cardiac muscle contraction;ko04261:Adrenergic signaling in cardiomyocytes;ko04270:Vascular smooth muscle contraction;ko04912:GnRH signaling pathway	Voltage-dependent L-type calcium channel subunit alpha-1S OS=Lithobates catesbeiana (American bullfrog) PE=2 SV=1	P	Inorganic ion transport and metabolism	PREDICTED: voltage-dependent L-type calcium channel subunit alpha-1F [Stegastes partitus]
slc25a43	201	82	5.42318	2.37268	9.88464e-05	-1.32484	down	--	--	Cellular Component: mitochondrial inner membrane (GO:0005743);; Cellular Component: integral component of membrane (GO:0016021);; Biological Process: transmembrane transport (GO:0055085);;	K15120|0|tru:101071899|solute carrier family 25 member 43-like; K15120 solute carrier family 25, member 43 (A)	--	Solute carrier family 25 member 43 GN=slc25a43 OS=Danio rerio (Zebrafish) PE=2 SV=1	C	Energy production and conversion	PREDICTED: solute carrier family 25 member 43-like [Oreochromis niloticus]
LOC100694597	173	21	1.71679	0.115675	0	-2.99219	down	[R]	General function prediction only	--	--	--	Kinase D-interacting substrate of 220 kDa OS=Danio rerio (Zebrafish) PE=2 SV=2	R	General function prediction only	PREDICTED: protein TANC1-like [Oreochromis niloticus]
LOC102081577	240	18	11.8624	0.8679	0	-3.66498	down	--	--	--	--	--	--	--	--	PREDICTED: uncharacterized protein LOC102081577 [Oreochromis niloticus]
LOC100696563	7205	3396	126.791	59.911	5.44061e-06	-1.13412	down	--	--	--	K17558|0|mze:101481200|protein phosphatase 1 regulatory subunit 15A-like; K17558 protein phosphatase 1 regulatory subunit 15B (A)	--	--	T	Signal transduction mechanisms	PREDICTED: protein phosphatase 1 regulatory subunit 15A-like [Oreochromis niloticus]
gadd45g	115	259	4.81829	10.3235	0.00129012	1.11084	up	--	--	Cellular Component: nucleus (GO:0005634);; Biological Process: response to stress (GO:0006950);; Biological Process: regulation of cell cycle (GO:0051726);;	K04402|3.63151e-104|mze:101486094|growth arrest and DNA damage-inducible protein GADD45 gamma-like; K04402 growth arrest and DNA-damage-inducible protein (A)	ko04010:MAPK signaling pathway;ko04068:FoxO signaling pathway;ko04110:Cell cycle;ko04115:p53 signaling pathway	40S ribosomal protein S12 OS=Gallus gallus (Chicken) PE=1 SV=2	D	Cell cycle control, cell division, chromosome partitioning	PREDICTED: growth arrest and DNA damage-inducible protein GADD45 gamma-like [Oreochromis niloticus]
invs	47	12	0.527103	0.125765	0.00847496	-1.87629	down	[R]	General function prediction only	--	--	--	Inversin GN=invs OS=Danio rerio (Zebrafish) PE=2 SV=1	R	General function prediction only	PREDICTED: inversin isoform X1 [Oreochromis niloticus]
pcnxl2	208	94	2.59781	1.08984	0.000862411	-1.18058	down	--	--	Cellular Component: integral component of membrane (GO:0016021);;	--	--	Pecanex-like protein 1 GN=pcnx OS=Takifugu rubripes (Japanese pufferfish) PE=3 SV=1	S	Function unknown	PREDICTED: pecanex-like protein 2 [Oreochromis niloticus]
clg19h15orf41	1089	521	24.5285	11.8904	2.18105e-05	-1.11046	down	--	--	--	--	--	Uncharacterized protein C15orf41 homolog GN=TTpA007f23.1 OS=Xenopus tropicalis (Western clawed frog) PE=2 SV=1	S	Function unknown	PREDICTED: uncharacterized protein C15orf41 homolog isoform X1 [Oreochromis niloticus]
LOC100691490	76	12	0.8614	0.148879	1.79128e-07	-2.55076	down	--	--	Molecular Function: protein binding (GO:0005515);;	--	--	Vasorin (Precursor) GN=vasn OS=Xenopus tropicalis (Western clawed frog) PE=2 SV=1	T	Signal transduction mechanisms	PREDICTED: vasorin-like [Oreochromis niloticus]
LOC100698485	307	150	1.13454	0.627206	0.00106329	-1.074	down	--	--	--	K08132|0|mze:101486363|collagen alpha-1(XII) chain-like; K08132 collagen, type XII, alpha (A)	--	Collagen alpha-1(XII) chain (Precursor) GN=COL12A1 OS=Gallus gallus (Chicken) PE=1 SV=3	W	Extracellular structures	PREDICTED: collagen alpha-1(XII) chain-like isoform X1 [Pundamilia nyererei]
prtfdc1	296	681	25.9125	61.9155	2.58831e-05	1.14828	up	[F]	Nucleotide transport and metabolism	Molecular Function: hypoxanthine phosphoribosyltransferase activity (GO:0004422);; Cellular Component: cytoplasm (GO:0005737);; Biological Process: purine ribonucleoside salvage (GO:0006166);;	--	--	Phosphoribosyltransferase domain-containing protein 1 GN=prtfdc1 OS=Xenopus laevis (African clawed frog) PE=2 SV=1	F	Nucleotide transport and metabolism	PREDICTED: phosphoribosyltransferase domain-containing protein 1-like isoform X2 [Oreochromis niloticus]
tmem198	265	109	3.25495	1.42952	2.31845e-05	-1.3175	down	--	--	Cellular Component: integral component of membrane (GO:0016021);;	--	--	Transmembrane protein 198-B GN=tmem198b OS=Danio rerio (Zebrafish) PE=2 SV=1	S	Function unknown	PREDICTED: transmembrane protein 198-B-like isoform X1 [Oreochromis niloticus]
LOC102076598	13	97	0.214477	1.57722	1.81171e-09	2.70233	up	--	--	--	--	--	--	491	Function unknown	PREDICTED: uncharacterized protein LOC102076598 [Oreochromis niloticus]
LOC100709295	152	419	0.590706	1.58637	4.28817e-07	1.40377	up	--	--	--	--	--	--	R	General function prediction only	PREDICTED: protein furry homolog isoform X2 [Neolamprologus brichardi]
LOC100703879	255	56	3.45735	0.522234	2.16049e-13	-2.20219	down	--	--	--	K17599|0|mze:101477501|transmembrane protein 132D-like; K17599 transmembrane protein 132 (A)	--	--	1417	Function unknown	PREDICTED: transmembrane protein 132D-like [Oreochromis niloticus]
lrp1b	374	166	2.27659	1.1056	3.5639e-05	-1.21276	down	--	--	--	--	--	Low-density lipoprotein receptor-related protein 1 (Precursor) GN=LRP1 OS=Gallus gallus (Chicken) PE=2 SV=1	T	Signal transduction mechanisms	PREDICTED: low-density lipoprotein receptor-related protein 1B-like [Haplochromis burtoni]
LOC100699762	147	7	2.18244	0.133963	0	-4.14177	down	--	--	Biological Process: calcium ion transport (GO:0006816);; Cellular Component: integral component of membrane (GO:0016021);;	K04873|0|mze:101482025|voltage-dependent calcium channel gamma-8 subunit-like; K04873 voltage-dependent calcium channel gamma-8 (A)	ko04010:MAPK signaling pathway;ko04260:Cardiac muscle contraction;ko04261:Adrenergic signaling in cardiomyocytes	--	P	Inorganic ion transport and metabolism	PREDICTED: voltage-dependent calcium channel gamma-8 subunit-like isoform X1 [Oreochromis niloticus]
LOC100703798	2763	563	71.473	15.8709	0	-2.34086	down	--	--	Cellular Component: plasma membrane (GO:0005886);; Biological Process: transport (GO:0006810);; Cellular Component: integral component of membrane (GO:0016021);;	K14620|0|mze:101484838|riboflavin transporter 2-like; K14620 riboflavin transporter 2 (A)	--	Riboflavin transporter 2 GN=rft2 OS=Salmo salar (Atlantic salmon) PE=2 SV=1	P	Inorganic ion transport and metabolism	PREDICTED: riboflavin transporter 2-like isoform X1 [Oreochromis niloticus]
pla2g4a	75	15	0.736745	0.159798	4.18903e-06	-2.24666	down	--	--	Molecular Function: phospholipase activity (GO:0004620);; Biological Process: phospholipid catabolic process (GO:0009395);;	K16342|0|mze:101480888|cytosolic phospholipase A2-like; K16342 cytosolic phospholipase A2 [EC:3.1.1.4] (A)	ko00564:Glycerophospholipid metabolism;ko00565:Ether lipid metabolism;ko00590:Arachidonic acid metabolism;ko00591:Linoleic acid metabolism;ko00592:alpha-Linolenic acid metabolism;ko04010:MAPK signaling pathway;ko04270:Vascular smooth muscle contraction;ko04370:VEGF signaling pathway;ko04912:GnRH signaling pathway	Lysophospholipase GN=pla2g4a OS=Danio rerio (Zebrafish) PE=2 SV=1	I	Lipid transport and metabolism	PREDICTED: cytosolic phospholipase A2-like isoform X1 [Oreochromis niloticus]
rnf122	470	181	9.74492	3.74251	1.19436e-07	-1.4175	down	--	--	--	K15699|1.30432e-110|ola:101159357|RING finger protein 122-like; K15699 RING finger protein 122 (A)	--	E3 ubiquitin-protein ligase RNF149 (Precursor) GN=rnf149 OS=Xenopus laevis (African clawed frog) PE=2 SV=1	O	Posttranslational modification, protein turnover, chaperones	PREDICTED: RING finger protein 122-like isoform X1 [Oreochromis niloticus]
hunk	86	33	1.06478	0.404675	0.0080498	-1.38568	down	[RTKL]	--	Molecular Function: protein serine/threonine kinase activity (GO:0004674);; Molecular Function: ATP binding (GO:0005524);; Biological Process: protein phosphorylation (GO:0006468);;	K08797|0|mze:101483467|hormonally up-regulated neu tumor-associated kinase homolog A-like; K08797 hormonally upregulated Neu-associated kinase [EC:2.7.11.1] (A)	--	Hormonally up-regulated neu tumor-associated kinase homolog A GN=hunk-a OS=Xenopus laevis (African clawed frog) PE=2 SV=1	T	Signal transduction mechanisms	PREDICTED: hormonally up-regulated neu tumor-associated kinase homolog A-like isoform X1 [Oreochromis niloticus]
LOC100690442	772	33	13.3542	0.947851	0	-4.52744	down	[V]	Defense mechanisms	Biological Process: drug transmembrane transport (GO:0006855);; Molecular Function: drug transmembrane transporter activity (GO:0015238);; Molecular Function: antiporter activity (GO:0015297);; Cellular Component: membrane (GO:0016020);;	K03327|0|mze:101471103|multidrug and toxin extrusion protein 1-like; K03327 multidrug resistance protein, MATE family (A)	--	Multidrug and toxin extrusion protein 1 GN=slc47a1 OS=Danio rerio (Zebrafish) PE=2 SV=1	P	Inorganic ion transport and metabolism	PREDICTED: multidrug and toxin extrusion protein 1-like [Oreochromis niloticus]
LOC100700457	888	298	15.6577	5.28613	1.65401e-11	-1.61902	down	--	--	Cellular Component: nucleus (GO:0005634);;	K11454|0|mze:101477848|uncharacterized LOC101477848; K11454 chromobox protein 7 (A)	--	Histone-lysine N-methyltransferase SUV39H2 GN=SUV39H2 OS=Gallus gallus (Chicken) PE=2 SV=1	B	Chromatin structure and dynamics	PREDICTED: chromo domain-containing protein cec-1-like [Oreochromis niloticus]
LOC100705468	111	36	5.60638	1.37475	8.20061e-05	-1.6281	down	--	--	--	--	--	--	354	General function prediction only	PREDICTED: uncharacterized protein LOC100705468 [Oreochromis niloticus]
LOC100709168	367	1022	12.4018	33.4982	5.77213e-09	1.42411	up	--	--	Cellular Component: cytoplasm (GO:0005737);; Biological Process: regulation of phosphorylation (GO:0042325);;	K17555|3.75727e-57|mze:101474346|protein phosphatase 1 regulatory subunit 14B-like; K17555 protein phosphatase 1 regulatory subunit 14B (A)	--	--	T	Signal transduction mechanisms	PREDICTED: protein phosphatase 1 regulatory subunit 14B-like [Oreochromis niloticus]
LOC100693720	125	51	1.43218	0.568199	0.00194032	-1.31401	down	--	--	--	--	--	--	T	Signal transduction mechanisms	PREDICTED: disabled homolog 1-like isoform X1 [Oreochromis niloticus]
LOC102078915	16755	40588	964.018	2332.02	8.34146e-07	1.22702	up	--	--	--	--	--	--	--	--	PREDICTED: uncharacterized protein LOC102078915 [Oreochromis niloticus]
LOC102081222	3	31	0.139171	1.23386	0.00347202	2.76313	up	--	--	--	K01158|1.79177e-162|mze:101480914|deoxyribonuclease-2-beta-like; K01158 deoxyribonuclease II [EC:3.1.22.1] (A)	ko04142:Lysosome	--	L	Replication, recombination and repair	PREDICTED: deoxyribonuclease-2-beta-like [Oreochromis niloticus]
tmem200a	35	6	0.303618	0.0565744	0.00700335	-2.29778	down	--	--	--	--	--	Transmembrane protein 200A GN=tmem200a OS=Danio rerio (Zebrafish) PE=3 SV=1	S	Function unknown	PREDICTED: transmembrane protein 200A-like [Oreochromis niloticus]
Tilapia_newGene_4460	94	31	0.594008	0.216198	0.000455293	-1.59729	down	--	--	--	--	--	Neoverrucotoxin subunit alpha OS=Synanceia verrucosa (Reef stonefish) PE=1 SV=1	R	General function prediction only	PREDICTED: protein NLRC3-like [Oreochromis niloticus]
rora	103	41	0.685061	0.299538	0.00434927	-1.34222	down	--	--	--	K08532|0|tru:101061119|nuclear receptor ROR-alpha-like; K08532 RAR-related orphan receptor alpha (A)	--	Retinoic acid receptor beta (Fragment) GN=RARB OS=Notophthalmus viridescens (Eastern newt) PE=3 SV=1	K	Transcription	PREDICTED: nuclear receptor ROR-alpha-like isoform X1 [Oreochromis niloticus]
LOC100702595	274	607	8.24674	19.9291	0.00011711	1.09354	up	--	--	Biological Process: positive regulation of T cell mediated cytotoxicity (GO:0001916);; Biological Process: antigen processing and presentation of peptide antigen via MHC class I (GO:0002474);; Molecular Function: peptide antigen binding (GO:0042605);; Cellular Component: MHC class I protein complex (GO:0042612);;	K06751|3.16836e-86|mze:101470702|class I histocompatibility antigen, F10 alpha chain-like; K06751 major histocompatibility complex, class I (A)	ko04144:Endocytosis;ko04145:Phagosome;ko04514:Cell adhesion molecules (CAMs);ko05168:Herpes simplex infection	Class I histocompatibility antigen, F10 alpha chain (Precursor) OS=Gallus gallus (Chicken) PE=2 SV=1	R	General function prediction only	PREDICTED: class I histocompatibility antigen, F10 alpha chain-like [Neolamprologus brichardi]
LOC100700811	319	155	4.76713	2.32267	0.00080527	-1.08225	down	--	--	--	K08601|0|mze:101483073|ubiquitin carboxyl-terminal hydrolase CYLD-like; K08601 ubiquitin thioesterase CYLD [EC:3.4.19.12] (A)	ko04622:RIG-I-like receptor signaling pathway	CAP-Gly domain-containing linker protein 1 GN=CLIP1 OS=Gallus gallus (Chicken) PE=2 SV=1	740	General function prediction only	PREDICTED: ubiquitin carboxyl-terminal hydrolase CYLD-like [Oreochromis niloticus]
LOC100703331	108	28	0.789142	0.188602	2.09351e-06	-1.93311	down	[S]	Function unknown	Molecular Function: calcium ion binding (GO:0005509);; Cellular Component: extracellular region (GO:0005576);; Biological Process: negative regulation of axon extension (GO:0030517);;	K06850|0|mze:101480300|slit homolog 3 protein-like; K06850 slit 3 (A)	--	Delta-like protein C (Precursor) GN=dlc OS=Danio rerio (Zebrafish) PE=2 SV=1	T	Signal transduction mechanisms	PREDICTED: slit homolog 3 protein-like isoform X1 [Oreochromis niloticus]
LOC100708014	267	691	5.13987	12.4292	3.99729e-07	1.31714	up	--	--	--	K14480|0|mze:101479002|uncharacterized LOC101479002; K14480 apolipoprotein L (A)	--	--	S	Function unknown	PREDICTED: uncharacterized protein LOC101479002 isoform X2 [Maylandia zebra]
LOC100697834	60	149	0.913104	2.26314	0.00246793	1.24013	up	[P]	Inorganic ion transport and metabolism	Molecular Function: N,N-dimethylaniline monooxygenase activity (GO:0004499);; Molecular Function: flavin adenine dinucleotide binding (GO:0050660);; Molecular Function: NADP binding (GO:0050661);; Biological Process: oxidation-reduction process (GO:0055114);;	--	--	--	Q	Secondary metabolites biosynthesis, transport and catabolism	PREDICTED: flavin-containing monooxygenase FMO GS-OX4-like isoform X1 [Oreochromis niloticus]
LOC100694479	18	259	0.834866	11.5456	0	3.68001	up	[R]	General function prediction only	Molecular Function: oxidoreductase activity (GO:0016491);; Biological Process: oxidation-reduction process (GO:0055114);;	--	--	Dehydrogenase/reductase SDR family member 11 (Precursor) GN=DHRS11 OS=Gallus gallus (Chicken) PE=2 SV=1	Q	Secondary metabolites biosynthesis, transport and catabolism	PREDICTED: dehydrogenase/reductase SDR family member 11-like [Oreochromis niloticus]
LOC102079967	687	1839	57.2639	150.537	8.23459e-09	1.36905	up	--	--	--	--	--	--	--	--	PREDICTED: interferon alpha-inducible protein 27-like protein 2-like [Oreochromis niloticus]
LOC100702544	45	4	1.16687	0.124378	6.02393e-06	-3.07873	down	--	--	Molecular Function: neuromedin U receptor activity (GO:0001607);; Biological Process: G-protein coupled receptor signaling pathway (GO:0007186);; Cellular Component: integral component of membrane (GO:0016021);;	K05052|0|mze:101463611|neuromedin-U receptor 1-like; K05052 neuromedin U receptor 1 (A)	ko04080:Neuroactive ligand-receptor interaction	Cholecystokinin receptor GN=cckar OS=Xenopus laevis (African clawed frog) PE=2 SV=1	T	Signal transduction mechanisms	PREDICTED: neuromedin-U receptor 1-like [Haplochromis burtoni]
susd1	66	3	1.20097	0.108571	5.33211e-11	-3.89239	down	--	--	--	--	--	Epidermal growth factor-like protein 6 (Precursor) GN=egfl6 OS=Xenopus laevis (African clawed frog) PE=2 SV=1	T	Signal transduction mechanisms	PREDICTED: sushi domain-containing protein 1-like [Oreochromis niloticus]
cald1	882	310	6.80454	2.69492	1.38482e-10	-1.55262	down	--	--	--	K12327|2.29566e-77|ola:101172158|uncharacterized LOC101172158; K12327 caldesmon (A)	ko04270:Vascular smooth muscle contraction	Caldesmon, smooth muscle (Fragment) GN=CALD1 OS=Meleagris gallopavo (Common turkey) PE=1 SV=2	S	Function unknown	PREDICTED: caldesmon-like [Oreochromis niloticus]
LOC100700148	37	6	0.27847	0.0489135	0.00288067	-2.37442	down	--	--	Molecular Function: transporter activity (GO:0005215);; Biological Process: transport (GO:0006810);; Cellular Component: membrane (GO:0016020);;	K14353|0|mze:101476567|solute carrier organic anion transporter family member 3A1-like; K14353 solute carrier organic anion transporter family, member 3A (A)	--	--	Q	Secondary metabolites biosynthesis, transport and catabolism	PREDICTED: solute carrier organic anion transporter family member 3A1-like [Oreochromis niloticus]
mpp5	31	4	0.422373	0.059068	0.00530982	-2.56402	down	--	--	--	K06091|0|mze:101463723|MAGUK p55 subfamily member 5-A-like; K06091 MAGUK p55 subfamily member 5 (A)	ko04530:Tight junction	MAGUK p55 subfamily member 5-A GN=mpp5a OS=Danio rerio (Zebrafish) PE=1 SV=2	T	Signal transduction mechanisms	PREDICTED: MAGUK p55 subfamily member 5-A-like [Oreochromis niloticus]
sox5	106	44	0.760913	0.310706	0.00700312	-1.28507	down	[B]	Chromatin structure and dynamics	--	K09269|0|mze:101465277|transcription factor SOX-5-like; K09269 transcription factor SOX5/6/13 (SOX group D) (A)	--	Transcription factor Sox-5 {ECO:0000250|UniProtKB:P35710} OS=Xenopus tropicalis (Western clawed frog) PE=2 SV=1	K	Transcription	PREDICTED: transcription factor SOX-5-like isoform X2 [Oreochromis niloticus]
polr2j	486	1119	72.723	158.043	8.8267e-06	1.15112	up	[K]	Transcription	Molecular Function: DNA binding (GO:0003677);; Molecular Function: DNA-directed RNA polymerase activity (GO:0003899);; Molecular Function: GTPase activator activity (GO:0005096);; Molecular Function: phospholipid binding (GO:0005543);; Cellular Component: intracellular (GO:0005622);; Biological Process: transcription, DNA-templated (GO:0006351);; Molecular Function: protein dimerization activity …	K03008|1.76116e-80|ola:101172727|DNA-directed RNA polymerase II subunit RPB11-a-like; K03008 DNA-directed RNA polymerase II subunit RPB11 (A)	ko00230:Purine metabolism;ko00240:Pyrimidine metabolism;ko03020:RNA polymerase	DNA-directed RNA polymerases I and III subunit RPAC2 GN=polr1d OS=Xenopus laevis (African clawed frog) PE=3 SV=1	K	Transcription	PREDICTED: DNA-directed RNA polymerase II subunit RPB11-a-like [Oryzias latipes]
aaed1	115	15	3.36993	0.440255	4.83646e-12	-2.85245	down	--	--	--	--	--	Thioredoxin-like protein AAED1 GN=aaed1 OS=Takifugu rubripes (Japanese pufferfish) PE=3 SV=1	S	Function unknown	PREDICTED: thioredoxin-like protein AAED1-like isoform X1 [Oreochromis niloticus]
LOC100706974	30	3	0.583499	0.0681545	0.00253718	-2.79667	down	--	--	--	K13912|0|mze:101463924|deleted in malignant brain tumors 1 protein-like; K13912 deleted in malignant brain tumors 1 protein (A)	--	Alpha-tectorin (Precursor) GN=TECTA OS=Gallus gallus (Chicken) PE=1 SV=1	R	General function prediction only	PREDICTED: deleted in malignant brain tumors 1 protein-like [Maylandia zebra]
LOC106098847	3	36	0.111639	1.20202	0.000311162	2.96832	up	--	--	--	--	--	--	366	Function unknown	PREDICTED: uncharacterized protein LOC102082168 [Oreochromis niloticus]
lgi3	243	7	4.32977	0.137098	0	-4.86054	down	--	--	--	--	--	Peroxidasin (Precursor) GN=pxdn OS=Xenopus tropicalis (Western clawed frog) PE=2 SV=1	R	General function prediction only	PREDICTED: leucine-rich repeat LGI family member 3-like isoform X1 [Oreochromis niloticus]
dbf4	162	41	2.35906	0.6119	7.86026e-09	-1.98723	down	--	--	Molecular Function: nucleic acid binding (GO:0003676);; Molecular Function: zinc ion binding (GO:0008270);;	K06629|0|mze:101469330|protein DBF4 homolog A-like; K06629 activator of S phase kinase (A)	ko04110:Cell cycle	Protein DBF4 homolog A GN=dbf4 OS=Xenopus laevis (African clawed frog) PE=1 SV=1	L	Replication, recombination and repair	PREDICTED: protein DBF4 homolog A-like isoform X1 [Oreochromis niloticus]
LOC102082014	333	144	3.84993	1.59734	2.81268e-05	-1.24889	down	--	--	--	--	--	Raftlin GN=RFTN1 OS=Gallus gallus (Chicken) PE=2 SV=3	R	General function prediction only	PREDICTED: raftlin-like isoform X1 [Oreochromis niloticus]
LOC100707005	62	283	1.22561	5.32285	9.15379e-13	2.11177	up	--	--	Molecular Function: sequence-specific DNA binding transcription factor activity (GO:0003700);; Cellular Component: nucleus (GO:0005634);; Biological Process: regulation of transcription, DNA-templated (GO:0006355);; Biological Process: photoreceptor cell development (GO:0042461);; Molecular Function: sequence-specific DNA binding (GO:0043565);; Biological Process: posterior lateral line neuromast…	--	--	Iroquois-class homeodomain protein irx-4-A GN=irx4-a OS=Xenopus laevis (African clawed frog) PE=2 SV=1	K	Transcription	PREDICTED: iroquois-class homeodomain protein irx-4-A-like isoform X1 [Oreochromis niloticus]
tmod1	256	76	2.84878	0.923609	2.46233e-09	-1.77855	down	--	--	Molecular Function: tropomyosin binding (GO:0005523);; Cellular Component: cytoskeleton (GO:0005856);;	K10370|0|mze:101483315|tropomodulin-1-like; K10370 tropomodulin (A)	--	--	Z	Cytoskeleton	PREDICTED: tropomodulin-1-like isoform X2 [Oreochromis niloticus]
insc	187	618	3.86425	13.6408	4.72253e-11	1.66648	up	--	--	--	--	--	--	R	General function prediction only	PREDICTED: protein inscuteable homolog [Oreochromis niloticus]
LOC102077827	357	86	6.89594	1.62134	3.83027e-14	-2.08107	down	--	--	--	--	--	--	R	General function prediction only	PREDICTED: retinitis pigmentosa 1-like 1 protein-like isoform X1 [Oreochromis niloticus]
LOC100705894	206	77	7.14896	2.84449	1.00337e-05	-1.44885	down	[S]	Function unknown	--	--	--	Gamma-glutamylaminecyclotransferase B GN=ggact.2 OS=Danio rerio (Zebrafish) PE=2 SV=1	S	Function unknown	PREDICTED: gamma-glutamylaminecyclotransferase B-like [Oreochromis niloticus]
celsr3	566	121	3.28015	0.683518	0	-2.25907	down	--	--	--	K04602|0|mze:101468096|cadherin EGF LAG seven-pass G-type receptor 3-like; K04602 cadherin EGF LAG seven-pass G-type receptor 3 (A)	--	Protocadherin-15 (Precursor) GN=Pcdh15 OS=Gallus gallus (Chicken) PE=1 SV=1	T	Signal transduction mechanisms	PREDICTED: cadherin EGF LAG seven-pass G-type receptor 3-like [Oreochromis niloticus]
LOC100690362	42	140	0.473565	1.58431	1.28597e-05	1.64935	up	[R]	General function prediction only	--	--	--	Zinc finger protein 148 GN=znf148 OS=Danio rerio (Zebrafish) PE=2 SV=2	K	Transcription	PREDICTED: zinc finger protein 281-like [Oreochromis niloticus]
LOC100696573	36	6	1.43365	0.228194	0.00449532	-2.33661	down	--	--	Cellular Component: intracellular (GO:0005622);; Molecular Function: zinc ion binding (GO:0008270);;	--	--	Nuclear factor 7, brain OS=Xenopus laevis (African clawed frog) PE=1 SV=1	O	Posttranslational modification, protein turnover, chaperones	PREDICTED: tripartite motif-containing protein 29-like, partial [Oreochromis niloticus]
LOC106098489	183	18	7.15973	0.722633	0	-3.27687	down	--	--	--	--	--	--	S	Function unknown	PREDICTED: uncharacterized protein LOC102081973 [Oreochromis niloticus]
LOC100712456	111	39	1.30828	0.495928	0.000329947	-1.51767	down	[P]	Inorganic ion transport and metabolism	Molecular Function: secondary active sulfate transmembrane transporter activity (GO:0008271);; Biological Process: sulfate transport (GO:0008272);; Cellular Component: integral component of membrane (GO:0016021);; Biological Process: transmembrane transport (GO:0055085);;	K14700|0|mze:101474513|sulfate anion transporter 1-like; K14700 solute carrier family 26 (sulfate anion transporter), member 1 (A)	--	Solute carrier family 26 member 9 GN=slc26a9 OS=Xenopus tropicalis (Western clawed frog) PE=2 SV=1	P	Inorganic ion transport and metabolism	PREDICTED: sulfate anion transporter 1-like isoform X1 [Oreochromis niloticus]
c5	77	237	0.654048	1.86809	7.96829e-07	1.55229	up	--	--	Molecular Function: endopeptidase inhibitor activity (GO:0004866);; Cellular Component: extracellular space (GO:0005615);; Biological Process: negative regulation of endopeptidase activity (GO:0010951);;	K03994|0|mze:101468953|complement C5-like; K03994 complement component 5 (A)	ko05168:Herpes simplex infection	Complement C3 gamma chain (Precursor; Fragment) GN=C3 OS=Lampetra japonica (Japanese lamprey) PE=2 SV=1	O	Posttranslational modification, protein turnover, chaperones	PREDICTED: complement C5 [Oreochromis niloticus]
LOC102083188	33	1	0.594412	0.0290658	2.0273e-05	-3.72369	down	--	--	--	--	--	Tumor necrosis factor receptor superfamily member 16 (Precursor) GN=NGFR OS=Gallus gallus (Chicken) PE=3 SV=1	T	Signal transduction mechanisms	PREDICTED: tumor necrosis factor receptor superfamily member 9-like [Oreochromis niloticus]
LOC100699603	96	36	7.35353	2.85167	0.00277284	-1.42196	down	[U]	Intracellular trafficking, secretion, and vesicular transport	Cellular Component: integral component of membrane (GO:0016021);; Biological Process: vesicle-mediated transport (GO:0016192);;	K08512|2.26935e-51|mze:101466855|vesicle-associated membrane protein 8-like; K08512 vesicle-associated membrane protein 8 (A)	ko04130:SNARE interactions in vesicular transport	Vesicle-associated membrane protein 2 GN=vamp2 OS=Xenopus laevis (African clawed frog) PE=3 SV=3	U	Intracellular trafficking, secretion, and vesicular transport	PREDICTED: vesicle-associated membrane protein 8-like isoform X1 [Maylandia zebra]
plcd1	82	18	1.17024	0.249413	4.54271e-06	-2.13458	down	--	--	--	K05857|0|mze:101473979|1-phosphatidylinositol 4,5-bisphosphate phosphodiesterase delta-1-like; K05857 phosphatidylinositol phospholipase C, delta [EC:3.1.4.11] (A)	ko00562:Inositol phosphate metabolism;ko04020:Calcium signaling pathway;ko04070:Phosphatidylinositol signaling system	1-phosphatidylinositol 4,5-bisphosphate phosphodiesterase delta-4 GN=plcd4 OS=Xenopus laevis (African clawed frog) PE=2 SV=1	I	Lipid transport and metabolism	PREDICTED: 1-phosphatidylinositol 4,5-bisphosphate phosphodiesterase delta-1-like isoform X2 [Oreochromis niloticus]
fam13b	1433	711	9.4923	4.46383	5.86665e-05	-1.05867	down	--	--	--	--	--	Rho GTPase-activating protein 15 GN=ARHGAP15 OS=Gallus gallus (Chicken) PE=2 SV=1	T	Signal transduction mechanisms	PREDICTED: protein FAM13B-like isoform X1 [Oreochromis niloticus]
LOC100691045	16	115	0.361211	2.60829	1.26375e-10	2.67532	up	--	--	Molecular Function: serine-type endopeptidase inhibitor activity (GO:0004867);;	K06238|0|mze:101486343|collagen alpha-3(VI) chain-like; K06238 collagen, type VI, alpha (A)	ko04510:Focal adhesion;ko04512:ECM-receptor interaction	Collagen alpha-3(VI) chain (Precursor) GN=COL6A3 OS=Gallus gallus (Chicken) PE=2 SV=2	W	Extracellular structures	PREDICTED: collagen alpha-3(VI) chain-like [Oreochromis niloticus]
LOC106098184	11	163	0.247062	3.6345	0	3.65261	up	--	--	--	K12012|0|mze:101473657|tripartite motif-containing protein 35-like; K12012 tripartite motif-containing protein 35 (A)	--	Nuclear factor 7, ovary OS=Xenopus laevis (African clawed frog) PE=2 SV=1	O	Posttranslational modification, protein turnover, chaperones	PREDICTED: tripartite motif-containing protein 35-like [Oreochromis niloticus]
LOC100701975	79	196	4.2643	9.69142	0.000549639	1.24419	up	--	--	Biological Process: antigen processing and presentation of peptide or polysaccharide antigen via MHC class II (GO:0002504);; Biological Process: immune response (GO:0006955);; Cellular Component: integral component of membrane (GO:0016021);; Cellular Component: MHC class II protein complex (GO:0042613);;	K06752|2.67095e-114|mze:101465461|HLA class II histocompatibility antigen, DRB1-14 beta chain-like; K06752 major histocompatibility complex, class II (A)	ko04145:Phagosome;ko04514:Cell adhesion molecules (CAMs);ko04672:Intestinal immune network for IgA production;ko05168:Herpes simplex infection	Class II histocompatibility antigen, B-L beta chain (Fragment) OS=Gallus gallus (Chicken) PE=3 SV=1	R	General function prediction only	PREDICTED: h-2 class II histocompatibility antigen, I-A beta chain-like isoformX1 [Oreochromis niloticus]
agt	181	393	4.13531	8.77753	0.000714409	1.06232	up	[O]	Posttranslational modification, protein turnover, chaperones	Molecular Function: serine-type endopeptidase inhibitor activity (GO:0004867);;	K09821|0|mze:101472432|angiotensinogen-like; K09821 angiotensinogen (A)	ko04614:Renin-angiotensin system	Alpha-1-antitrypsin homolog (Precursor) OS=Cyprinus carpio (Common carp) PE=2 SV=1	V	Defense mechanisms	PREDICTED: angiotensinogen-like [Oreochromis niloticus]
oc90	275	51	3.50657	0.62497	2.22045e-16	-2.44118	down	--	--	Molecular Function: phospholipase A2 activity (GO:0004623);; Molecular Function: calcium ion binding (GO:0005509);; Cellular Component: extracellular region (GO:0005576);; Biological Process: phospholipid metabolic process (GO:0006644);; Biological Process: lipid catabolic process (GO:0016042);; Biological Process: otolith development (GO:0048840);;	--	--	Basic phospholipase A2 caudoxin OS=Bitis caudalis (Horned adder) PE=1 SV=1	I	Lipid transport and metabolism	PREDICTED: uncharacterized protein LOC102081279 isoform X3 [Oreochromis niloticus]
LOC100700735	138	301	4.0562	16.0275	0.00155354	1.06672	up	[T]	Signal transduction mechanisms	Molecular Function: phosphoprotein phosphatase activity (GO:0004721);; Molecular Function: iron ion binding (GO:0005506);; Molecular Function: calcium ion binding (GO:0005509);; Molecular Function: manganese ion binding (GO:0030145);; Biological Process: detection of stimulus involved in sensory perception (GO:0050906);;	K13807|0|mze:101483626|serine/threonine-protein phosphatase with EF-hands 1-like; K13807 serine/threonine-protein phosphatase with EF-hands [EC:3.1.3.16] (A)	--	Serine/threonine-protein phosphatase 2A catalytic subunit alpha isoform GN=PPP2CA OS=Gallus gallus (Chicken) PE=2 SV=1	T	Signal transduction mechanisms	PREDICTED: serine/threonine-protein phosphatase with EF-hands 2-like, partial [Oreochromis niloticus]
LOC100691760	358	173	6.84803	3.29533	0.000465382	-1.09098	down	--	--	Cellular Component: intracellular (GO:0005622);; Molecular Function: zinc ion binding (GO:0008270);;	--	--	Nuclear factor 7, ovary OS=Xenopus laevis (African clawed frog) PE=2 SV=1	O	Posttranslational modification, protein turnover, chaperones	PREDICTED: tripartite motif-containing protein 16-like [Oreochromis niloticus]
LOC100705928	75	246	0.380619	1.22704	1.01108e-07	1.64284	up	[Z]	Cytoskeleton	Molecular Function: motor activity (GO:0003774);; Molecular Function: actin binding (GO:0003779);; Molecular Function: calmodulin binding (GO:0005516);; Molecular Function: ATP binding (GO:0005524);; Cellular Component: myofibril (GO:0030016);; Cellular Component: myosin filament (GO:0032982);;	K10352|0|mze:101481850|myosin heavy chain, fast skeletal muscle-like; K10352 myosin heavy chain (A)	ko04530:Tight junction	Myosin heavy chain, fast skeletal muscle OS=Cyprinus carpio (Common carp) PE=2 SV=2	Z	Cytoskeleton	PREDICTED: myosin heavy chain, fast skeletal muscle-like [Oreochromis niloticus]
LOC100696514	295	1241	7.18432	33.6484	0	2.01727	up	--	--	Biological Process: intracellular transport (GO:0046907);;	--	--	Ena/VASP-like protein OS=Xenopus laevis (African clawed frog) PE=2 SV=1	T	Signal transduction mechanisms	PREDICTED: ena/VASP-like protein-like isoform X1 [Oreochromis niloticus]
LOC100710958	143	44	2.18643	0.667114	2.67056e-06	-1.71126	down	--	--	--	K07820|0|mze:101467655|beta-1,3-galactosyltransferase 2-like; K07820 beta-1,3-galactosyltransferase 2 [EC:2.4.1.-] (A)	ko00601:Glycosphingolipid biosynthesis - lacto and neolacto series	Lactosylceramide 1,3-N-acetyl-beta-D-glucosaminyltransferase A GN=b3gnt5a OS=Danio rerio (Zebrafish) PE=2 SV=1	G	Carbohydrate transport and metabolism	PREDICTED: beta-1,3-galactosyltransferase 2-like isoform X1 [Oreochromis niloticus]
gata6	950	429	12.3411	5.51523	3.32883e-06	-1.19307	down	[K]	Transcription	Biological Process: liver development (GO:0001889);; Molecular Function: sequence-specific DNA binding transcription factor activity (GO:0003700);; Cellular Component: nucleus (GO:0005634);; Molecular Function: zinc ion binding (GO:0008270);; Biological Process: myeloid cell differentiation (GO:0030099);; Molecular Function: sequence-specific DNA binding (GO:0043565);; Biological Process: positiv…	K17897|0|mze:101481890|GATA-binding factor 6-B-like; K17897 GATA-binding protein 6 (A)	--	GATA-binding factor 6-A GN=gata6-a OS=Xenopus laevis (African clawed frog) PE=2 SV=1	K	Transcription	PREDICTED: GATA-binding factor 6-B-like isoform X2 [Oreochromis niloticus]
LOC100706541	2439	7150	101.397	293.663	3.27861e-11	1.50166	up	--	--	--	--	--	Tyrosyl-DNA phosphodiesterase 2 OS=Danio rerio (Zebrafish) PE=1 SV=3	L	Replication, recombination and repair	PREDICTED: tyrosyl-DNA phosphodiesterase 2-like [Oreochromis niloticus]
mex3a	192	73	1.3298	0.657706	2.52946e-05	-1.4234	down	--	--	--	K15686|0|mze:101466035|RNA-binding protein MEX3A-like; K15686 RNA-binding protein MEX3 (A)	--	RNA-binding protein MEX3B GN=mex3b OS=Xenopus laevis (African clawed frog) PE=2 SV=1	O	Posttranslational modification, protein turnover, chaperones	PREDICTED: RNA-binding protein MEX3A-like [Oreochromis niloticus]
LOC100697411	206	92	4.26599	1.74831	0.000693449	-1.19721	down	[RTKL]	--	Molecular Function: protein tyrosine kinase activity (GO:0004713);; Molecular Function: ATP binding (GO:0005524);; Biological Process: protein phosphorylation (GO:0006468);;	K05728|0|mze:101482381|tyrosine-protein kinase CSK-like; K05728 c-src tyrosine kinase [EC:2.7.10.2] (A)	--	Tyrosine-protein kinase CSK GN=CSK OS=Gallus gallus (Chicken) PE=1 SV=1	T	Signal transduction mechanisms	PREDICTED: tyrosine-protein kinase CSK-like [Oreochromis niloticus]
xdh	5	79	0.0485405	0.771298	3.77819e-11	3.55055	up	[F]	Nucleotide transport and metabolism	Molecular Function: xanthine dehydrogenase activity (GO:0004854);; Molecular Function: xanthine oxidase activity (GO:0004855);; Molecular Function: iron ion binding (GO:0005506);; Molecular Function: UDP-N-acetylmuramate dehydrogenase activity (GO:0008762);; Molecular Function: electron carrier activity (GO:0009055);; Molecular Function: molybdenum ion binding (GO:0030151);; Molecular Function: m…	K00106|0|mze:101478907|xanthine dehydrogenase/oxidase-like; K00106 xanthine dehydrogenase/oxidase [EC:1.17.1.4 1.17.3.2] (A)	ko00230:Purine metabolism;ko00232:Caffeine metabolism;ko00983:Drug metabolism - other enzymes;ko04146:Peroxisome	Xanthine oxidase GN=XDH OS=Gallus gallus (Chicken) PE=1 SV=1	F	Nucleotide transport and metabolism	PREDICTED: xanthine dehydrogenase/oxidase-like [Oreochromis niloticus]
LOC100699354	1396	3361	57.9224	125.179	5.21445e-07	1.21726	up	[E]	Amino acid transport and metabolism	Molecular Function: creatine kinase activity (GO:0004111);; Molecular Function: ATP binding (GO:0005524);; Biological Process: phosphorylation (GO:0016310);;	K00933|0|mze:101477834|creatine kinase B-type-like; K00933 creatine kinase [EC:2.7.3.2] (A)	ko00330:Arginine and proline metabolism	Creatine kinase B-type GN=CKB OS=Gallus gallus (Chicken) PE=1 SV=1	C	Energy production and conversion	PREDICTED: creatine kinase B-type-like [Oreochromis niloticus]
LOC102079122	52	166	0.808538	2.51706	6.8127e-06	1.59482	up	[L]	Replication, recombination and repair	--	--	--	Cryptochrome-2 GN=CRY2 OS=Gallus gallus (Chicken) PE=2 SV=2	T	Signal transduction mechanisms	PREDICTED: cryptochrome-2-like [Oreochromis niloticus]
LOC100692075	0	39	0	0.415251	2.17412e-07	4.56961	up	[ER]	--	Molecular Function: transporter activity (GO:0005215);; Cellular Component: integral component of membrane (GO:0016021);; Biological Process: transmembrane transport (GO:0055085);;	K14387|0|mze:101468408|high-affinity choline transporter 1-like; K14387 solute carrier family 5 (high affinity choline transporter), member 7 (A)	--	High-affinity choline transporter 1 GN=CHT1 OS=Torpedo marmorata (Marbled electric ray) PE=2 SV=1	P	Inorganic ion transport and metabolism	PREDICTED: high-affinity choline transporter 1-like [Oreochromis niloticus]
LOC100708831	846	196	10.1251	2.2588	0	-2.14942	down	--	--	--	K08229|0|mze:101469078|large neutral amino acids transporter small subunit 4-like; K08229 MFS transporter, LAT3 family, solute carrier family 43, member 2 (A)	--	Large neutral amino acids transporter small subunit 4 GN=slc43a2 OS=Xenopus tropicalis (Western clawed frog) PE=2 SV=1	P	Inorganic ion transport and metabolism	PREDICTED: large neutral amino acids transporter small subunit 4-like isoform X1 [Oreochromis niloticus]
rac1	2472	1031	61.1147	27.0733	2.96709e-08	-1.30956	down	[R]	General function prediction only	Molecular Function: GTP binding (GO:0005525);; Cellular Component: intracellular (GO:0005622);; Biological Process: small GTPase mediated signal transduction (GO:0007264);; Biological Process: myoblast fusion (GO:0007520);; Cellular Component: membrane (GO:0016020);; Biological Process: cell migration involved in gastrulation (GO:0042074);;	K04392|3.61049e-135|mze:101483895|ras-related C3 botulinum toxin substrate 1-like; K04392 Ras-related C3 botulinum toxin substrate 1 (A)	ko04010:MAPK signaling pathway;ko04145:Phagosome;ko04310:Wnt signaling pathway;ko04370:VEGF signaling pathway;ko04510:Focal adhesion;ko04520:Adherens junction;ko04620:Toll-like receptor signaling pathway;ko04810:Regulation of actin cytoskeleton;ko05132:Salmonella infection	Cell division control protein 42 homolog (Precursor) GN=CDC42 OS=Gallus gallus (Chicken) PE=2 SV=1	T	Signal transduction mechanisms	PREDICTED: ras-related C3 botulinum toxin substrate 1-like isoform X1 [Oreochromis niloticus]
LOC100692261	120	47	0.735554	0.304665	0.00123234	-1.36975	down	[RTKL]	--	Molecular Function: protein serine/threonine kinase activity (GO:0004674);; Molecular Function: ATP binding (GO:0005524);; Biological Process: protein phosphorylation (GO:0006468);;	K15596|0|mze:101468598|cyclin-dependent kinase 18-like; K15596 cyclin-dependent kinase 18 [EC:2.7.11.22] (A)	--	Cyclin-dependent kinase 14 GN=cdk14 OS=Xenopus tropicalis (Western clawed frog) PE=2 SV=1	R	General function prediction only	PREDICTED: cyclin-dependent kinase 18-like [Oreochromis niloticus]
ccdc90b	472	1331	11.1013	31.082	1.54833e-09	1.4431	up	--	--	--	--	--	Coiled-coil domain-containing protein 90B, mitochondrial (Precursor) GN=ccdc90b OS=Xenopus tropicalis (Western clawed frog) PE=2 SV=2	S	Function unknown	PREDICTED: coiled-coil domain-containing protein 90B, mitochondrial-like isoform X2 [Oreochromis niloticus]
LOC100711957	153	42	3.66729	0.932368	1.04886e-07	-1.87224	down	--	--	--	--	--	Neoverrucotoxin subunit alpha OS=Synanceia verrucosa (Reef stonefish) PE=1 SV=1	--	--	PREDICTED: protein NLRC3-like isoform X1 [Neolamprologus brichardi]
dusp6	80	24	1.16116	0.363877	0.000464996	-1.71634	down	[T]	Signal transduction mechanisms	Biological Process: inactivation of MAPK activity (GO:0000188);; Molecular Function: protein tyrosine phosphatase activity (GO:0004725);; Cellular Component: cytosol (GO:0005829);; Biological Process: dorsal/ventral pattern formation (GO:0009953);; Molecular Function: kinase activity (GO:0016301);; Molecular Function: MAP kinase tyrosine/serine/threonine phosphatase activity (GO:0017017);; Biolog…	K04459|0|mze:101468411|dual specificity protein phosphatase 6-like; K04459 dual specificity MAP kinase phosphatase [EC:3.1.3.16 3.1.3.48] (A)	ko04010:MAPK signaling pathway	Dual specificity protein phosphatase 4 GN=DUSP4 OS=Gallus gallus (Chicken) PE=2 SV=1	V	Defense mechanisms	PREDICTED: dual specificity protein phosphatase 6-like isoform X1 [Oreochromis niloticus]
LOC100695253	86	21	1.79203	0.41859	1.16855e-05	-1.9976	down	[K]	Transcription	Molecular Function: sequence-specific DNA binding transcription factor activity (GO:0003700);; Cellular Component: nucleus (GO:0005634);; Biological Process: regulation of transcription, DNA-templated (GO:0006355);; Molecular Function: sequence-specific DNA binding (GO:0043565);;	K09328|0|mze:101480165|homeobox protein unc-4 homolog; K09328 homeobox protein Unc-4 (A)	--	Homeobox protein unc-4 homolog GN=uncx OS=Danio rerio (Zebrafish) PE=2 SV=2	K	Transcription	PREDICTED: homeobox protein unc-4 homolog [Oreochromis niloticus]
LOC100710042	402	194	5.4612	3.04296	0.000304247	-1.09373	down	--	--	--	--	--	--	--	--	PREDICTED: suppressor protein SRP40-like [Oreochromis niloticus]
fndc1	318	54	2.20071	0.361668	0	-2.56975	down	--	--	--	--	--	Protogenin B (Precursor; Fragment) OS=Danio rerio (Zebrafish) PE=2 SV=1	T	Signal transduction mechanisms	PREDICTED: fibronectin type III domain-containing protein 1-like isoform X3 [Oreochromis niloticus]
LOC100534448	52	12	1.96639	0.404274	0.00136678	-2.01741	down	[O]	Posttranslational modification, protein turnover, chaperones	--	K03283|0|mze:101481563|heat shock 70 kDa protein 1-like; K03283 heat shock 70kDa protein 1/8 (A)	ko03040:Spliceosome;ko04010:MAPK signaling pathway;ko04141:Protein processing in endoplasmic reticulum;ko04144:Endocytosis	Heat shock 70 kDa protein 1 OS=Oryzias latipes (Medaka fish) PE=3 SV=1	O	Posttranslational modification, protein turnover, chaperones	PREDICTED: heat shock 70 kDa protein 1-like, partial [Oreochromis niloticus]
LOC100700724	466	152	5.02343	1.66898	2.71221e-10	-1.65455	down	--	--	Molecular Function: metallocarboxypeptidase activity (GO:0004181);; Biological Process: proteolysis (GO:0006508);; Biological Process: cell adhesion (GO:0007155);; Molecular Function: zinc ion binding (GO:0008270);;	K08638|0|mze:101469686|probable carboxypeptidase X1-like; K08638 carboxypeptidase X1 [EC:3.4.17.-] (A)	--	Carboxypeptidase E (Precursor) GN=cpe OS=Lophius americanus (American goosefish) PE=2 SV=1	R	General function prediction only	PREDICTED: probable carboxypeptidase X1-like [Oreochromis niloticus]
LOC102079042	261	571	4.92583	11.3794	0.000200597	1.07528	up	--	--	--	--	--	Matrix-remodeling-associated protein 8 (Precursor) GN=mxra8 OS=Xenopus laevis (African clawed frog) PE=2 SV=1	T	Signal transduction mechanisms	PREDICTED: matrix-remodeling-associated protein 8-like isoform X1 [Oreochromis niloticus]
LOC100699125	1591	623	7.16459	2.65707	3.0449e-09	-1.39952	down	[Z]	Cytoskeleton	--	K10352|0|mze:101474159|myosin-10-like; K10352 myosin heavy chain (A)	ko04530:Tight junction	Myosin-11 GN=MYH11 OS=Gallus gallus (Chicken) PE=1 SV=4	Z	Cytoskeleton	PREDICTED: myosin-10-like isoform X1 [Oreochromis niloticus]
LOC100697091	2311	4945	335.928	708.585	6.3637e-05	1.04756	up	--	--	Molecular Function: cytochrome-c oxidase activity (GO:0004129);; Cellular Component: mitochondrion (GO:0005739);;	K02267|6.6135e-59|mze:101471450|cytochrome c oxidase subunit 6B1-like; K02267 cytochrome c oxidase subunit 6b (A)	ko00190:Oxidative phosphorylation;ko04260:Cardiac muscle contraction	Cytochrome c oxidase subunit 6B (Fragments) OS=Thunnus obesus (Bigeye tuna) PE=1 SV=2	C	Energy production and conversion	PREDICTED: cytochrome c oxidase subunit 6B1-like [Oreochromis niloticus]
arrdc3	985	376	10.8162	4.3305	3.41147e-09	-1.43461	down	--	--	--	--	--	--	R	General function prediction only	PREDICTED: arrestin domain-containing protein 3 isoformX1 [Oreochromis niloticus]
LOC100701926	170	438	4.0233	9.09927	3.0675e-06	1.30768	up	[R]	General function prediction only	--	--	--	--	R	General function prediction only	PREDICTED: interferon-induced protein with tetratricopeptide repeats 5-like [Oreochromis niloticus]
entpd8	8	41	0.243782	1.16707	0.00879808	2.09574	up	[GO]	--	Biological Process: response to ethanol (GO:0045471);; Biological Process: response to copper ion (GO:0046688);; Biological Process: cellular response to methanol (GO:0071405);;	--	--	Ectonucleoside triphosphate diphosphohydrolase 2 GN=ENTPD2 OS=Gallus gallus (Chicken) PE=1 SV=2	F	Nucleotide transport and metabolism	PREDICTED: ectonucleoside triphosphate diphosphohydrolase 2-like isoform X1 [Oreochromis niloticus]
LOC100690058	116	1	1.34425	0.0183984	0	-5.48707	down	--	--	Molecular Function: transporter activity (GO:0005215);; Biological Process: transport (GO:0006810);; Cellular Component: synaptic vesicle (GO:0008021);; Cellular Component: membrane (GO:0016020);;	--	--	Synaptotagmin-1 GN=SYT1 OS=Gallus gallus (Chicken) PE=2 SV=1	U	Intracellular trafficking, secretion, and vesicular transport	PREDICTED: double C2-like domain-containing protein beta-like isoform 1 [Oreochromis niloticus]
mmp2	525	251	8.66859	4.35246	0.000102304	-1.10871	down	--	--	Molecular Function: metalloendopeptidase activity (GO:0004222);; Cellular Component: collagen trimer (GO:0005581);; Biological Process: proteolysis (GO:0006508);; Molecular Function: zinc ion binding (GO:0008270);;	K01398|0|mze:101472680|72 kDa type IV collagenase-like; K01398 matrix metalloproteinase-2 (gelatinase A) [EC:3.4.24.24] (A)	ko04912:GnRH signaling pathway	72 kDa type IV collagenase (Precursor) GN=MMP2 OS=Gallus gallus (Chicken) PE=1 SV=1	W	Extracellular structures	PREDICTED: 72 kDa type IV collagenase [Oreochromis niloticus]
nuak1	209	89	1.48019	0.655463	0.000214997	-1.26484	down	[RTKL]	--	Molecular Function: protein serine/threonine kinase activity (GO:0004674);; Molecular Function: ATP binding (GO:0005524);; Biological Process: protein phosphorylation (GO:0006468);;	K08800|0|mze:101484918|NUAK family SNF1-like kinase 1-like; K08800 NUAK family, SNF1-like kinase [EC:2.7.11.1] (A)	--	Serine/threonine-protein kinase SIK3 homolog GN=zgc:66101 OS=Danio rerio (Zebrafish) PE=2 SV=1	T	Signal transduction mechanisms	PREDICTED: NUAK family, SNF1-like kinase, 1 [Oreochromis niloticus]
LOC100698562	455	181	8.00525	3.30578	4.36981e-07	-1.37087	down	[I]	Lipid transport and metabolism	Molecular Function: catalytic activity (GO:0003824);; Biological Process: metabolic process (GO:0008152);; Cellular Component: membrane (GO:0016020);;	K01080|0|mze:101474878|lipid phosphate phosphohydrolase 3-like; K01080 phosphatidate phosphatase [EC:3.1.3.4] (A)	ko00561:Glycerolipid metabolism;ko00564:Glycerophospholipid metabolism;ko00565:Ether lipid metabolism;ko00600:Sphingolipid metabolism	Lipid phosphate phosphatase-related protein type 5 GN=lppr5 OS=Xenopus laevis (African clawed frog) PE=2 SV=2	I	Lipid transport and metabolism	PREDICTED: lipid phosphate phosphohydrolase 3-like [Oreochromis niloticus]
arhgap42	372	103	4.27938	1.21813	4.24016e-12	-1.88461	down	--	--	Molecular Function: GTPase activator activity (GO:0005096);; Molecular Function: phospholipid binding (GO:0005543);; Cellular Component: intracellular (GO:0005622);; Biological Process: signal transduction (GO:0007165);; Biological Process: positive regulation of GTPase activity (GO:0043547);;	--	--	Rho GTPase-activating protein 42 OS=Danio rerio (Zebrafish) PE=2 SV=3	T	Signal transduction mechanisms	PREDICTED: rho GTPase-activating protein 42-like isoform X1 [Pundamilia nyererei]
LOC102079789	1505	684	22.6324	10.6122	1.98608e-06	-1.18503	down	--	--	--	K05069|0|mze:101487003|uncharacterized LOC101487003; K05069 interleukin 2 receptor beta (A)	ko04060:Cytokine-cytokine receptor interaction;ko04144:Endocytosis;ko04630:Jak-STAT signaling pathway	--	T	Signal transduction mechanisms	PREDICTED: interleukin-2 receptor subunit beta-like isoform X1 [Oreochromis niloticus]
jun	311	153	5.92399	2.81891	0.00120687	-1.06433	down	--	--	Molecular Function: sequence-specific DNA binding transcription factor activity (GO:0003700);; Cellular Component: nucleus (GO:0005634);; Cellular Component: transcription factor complex (GO:0005667);; Biological Process: regulation of transcription, DNA-templated (GO:0006355);; Molecular Function: beta-catenin binding (GO:0008013);; Molecular Function: sequence-specific DNA binding (GO:0043565);…	K04448|0|mze:101486839|transcription factor AP-1-like; K04448 transcription factor AP-1 (A)	ko04010:MAPK signaling pathway;ko04012:ErbB signaling pathway;ko04310:Wnt signaling pathway;ko04510:Focal adhesion;ko04620:Toll-like receptor signaling pathway;ko04912:GnRH signaling pathway;ko05132:Salmonella infection;ko05168:Herpes simplex infection	Transcription factor AP-1 GN=JUN OS=Coturnix coturnix japonica (Japanese quail) PE=2 SV=1	K	Transcription	PREDICTED: transcription factor AP-1-like [Oreochromis niloticus]
LOC100692110	35	102	2.72345	8.18579	0.00183462	1.45111	up	--	--	Molecular Function: carbohydrate binding (GO:0030246);;	--	--	Ladderlectin (Precursor) OS=Oncorhynchus mykiss (Rainbow trout) PE=1 SV=2	R	General function prediction only	PREDICTED: type-2 ice-structuring protein-like isoform X2 [Oreochromis niloticus]
LOC100694020	16	171	0.420018	3.51457	0	3.24073	up	--	--	--	--	--	Schwann cell myelin protein (Precursor) GN=SMP OS=Coturnix coturnix japonica (Japanese quail) PE=1 SV=1	T	Signal transduction mechanisms	PREDICTED: sialoadhesin-like isoform X1 [Oreochromis niloticus]
LOC102079674	7	95	0.131128	1.58342	1.73894e-12	3.43245	up	--	--	--	K14480|1.51075e-133|mze:101470030|micronuclear linker histone polyprotein-like; K14480 apolipoprotein L (A)	--	--	107	General function prediction only	PREDICTED: ABC transporter F family member 4-like [Oreochromis niloticus]
casz1	245	103	1.07674	0.460693	6.43028e-05	-1.2854	down	--	--	--	--	--	--	R	General function prediction only	PREDICTED: zinc finger protein castor homolog 1-like isoform X1 [Oreochromis niloticus]
scarb2	839	166	10.0069	2.07397	0	-2.37486	down	--	--	--	K12384|0|mze:101466881|lysosome membrane protein 2-like; K12384 lysosome membrane protein 2 (A)	ko04142:Lysosome	--	T	Signal transduction mechanisms	PREDICTED: lysosome membrane protein 2-like isoform X1 [Oreochromis niloticus]
stx19	113	22	2.90944	0.628984	6.78203e-09	-2.32283	down	--	--	Cellular Component: membrane (GO:0016020);; Biological Process: vesicle-mediated transport (GO:0016192);;	K08487|9.88942e-162|mze:101476907|syntaxin-19-like; K08487 syntaxin 11 (A)	ko04130:SNARE interactions in vesicular transport	--	U	Intracellular trafficking, secretion, and vesicular transport	PREDICTED: syntaxin-19-like isoform X1 [Oreochromis niloticus]
LOC100694392	326	147	4.62943	2.25287	0.000100885	-1.189	down	[R]	General function prediction only	Molecular Function: neurotransmitter:sodium symporter activity (GO:0005328);; Molecular Function: taurine:sodium symporter activity (GO:0005369);; Cellular Component: integral component of plasma membrane (GO:0005887);; Biological Process: neurotransmitter transport (GO:0006836);;	K05039|0|mze:101463803|sodium- and chloride-dependent taurine transporter-like; K05039 solute carrier family 6 (neurotransmitter transporter, GABA) member 6/8/11/12/13 (A)	--	Creatine transporter OS=Torpedo marmorata (Marbled electric ray) PE=2 SV=1	P	Inorganic ion transport and metabolism	PREDICTED: sodium- and chloride-dependent taurine transporter-like isoform X1 [Oreochromis niloticus]
LOC102075682	66	1	0.858957	0.019814	6.78901e-13	-4.68879	down	--	--	--	--	--	--	T	Signal transduction mechanisms	PREDICTED: uncharacterized protein LOC102075682 [Oreochromis niloticus]
lrrc8a	299	152	2.28605	1.26298	0.00307421	-1.01722	down	[S]	Function unknown	--	--	--	Volume-regulated anion channel subunit LRRC8E GN=lrrc8e OS=Xenopus tropicalis (Western clawed frog) PE=2 SV=1	S	Function unknown	PREDICTED: leucine-rich repeat-containing protein 8A-like [Oreochromis niloticus]
LOC100699039	469	185	0.883969	0.32158	2.80117e-07	-1.3832	down	[Z]	Cytoskeleton	--	--	--	Dystrophin GN=DMD OS=Gallus gallus (Chicken) PE=2 SV=1	Z	Cytoskeleton	PREDICTED: nesprin-1-like [Larimichthys crocea]
oat	671	316	14.3399	6.9985	3.27646e-05	-1.1315	down	[E]	Amino acid transport and metabolism	Biological Process: metabolic process (GO:0008152);; Molecular Function: transaminase activity (GO:0008483);; Molecular Function: pyridoxal phosphate binding (GO:0030170);;	K00819|0|mze:101468904|ornithine aminotransferase, mitochondrial-like; K00819 ornithine--oxo-acid transaminase [EC:2.6.1.13] (A)	ko00330:Arginine and proline metabolism	Ethanolamine-phosphate phospho-lyase GN=etnppl OS=Xenopus laevis (African clawed frog) PE=2 SV=1	E	Amino acid transport and metabolism	PREDICTED: ornithine aminotransferase, mitochondrial-like [Oreochromis niloticus]
LOC100707473	119	47	1.62972	0.595993	0.00150675	-1.35784	down	--	--	--	--	--	Triple functional domain protein GN=trio OS=Danio rerio (Zebrafish) PE=3 SV=1	T	Signal transduction mechanisms	PREDICTED: guanine nucleotide exchange factor DBS-like isoform X1 [Haplochromis burtoni]
LOC100706335	170	582	5.18968	18.9948	1.6756e-11	1.71638	up	[GC]	--	Biological Process: metabolic process (GO:0008152);; Molecular Function: transferase activity, transferring hexosyl groups (GO:0016758);;	K00699|0|mze:101468674|UDP-glucuronosyltransferase 1-5-like; K00699 glucuronosyltransferase [EC:2.4.1.17] (A)	ko00040:Pentose and glucuronate interconversions;ko00053:Ascorbate and aldarate metabolism;ko00140:Steroid hormone biosynthesis;ko00500:Starch and sucrose metabolism;ko00830:Retinol metabolism;ko00860:Porphyrin and chlorophyll metabolism;ko00980:Metabolism of xenobiotics by cytochrome P450;ko00982:Drug metabolism - cytochrome P450;ko00983:Drug metabolism - other enzymes	UDP-glucuronosyltransferase (Fragment) GN=ugt3 OS=Pleuronectes platessa (European plaice) PE=2 SV=1	G	Carbohydrate transport and metabolism	PREDICTED: UDP-glucuronosyltransferase 2A1-like [Oreochromis niloticus]
rd3	98	28	1.6737	0.445415	3.16927e-05	-1.79515	down	--	--	--	--	--	--	R	General function prediction only	PREDICTED: protein RD3-like [Oreochromis niloticus]
LOC100706482	32	4	0.787316	0.10582	0.0032705	-2.60754	down	[E]	Amino acid transport and metabolism	Molecular Function: arginase activity (GO:0004053);; Biological Process: arginine metabolic process (GO:0006525);; Molecular Function: metal ion binding (GO:0046872);;	K01476|0|mze:101463875|arginase-1-like; K01476 arginase [EC:3.5.3.1] (A)	ko00330:Arginine and proline metabolism;ko01230:Biosynthesis of amino acids	Arginase, hepatic OS=Lithobates catesbeiana (American bullfrog) PE=2 SV=1	E	Amino acid transport and metabolism	PREDICTED: arginase-1-like [Oreochromis niloticus]
Tilapia_newGene_1315	346	749	173.51	373.171	0.000151947	1.06124	up	--	--	Cellular Component: mitochondrial proton-transporting ATP synthase complex, coupling factor F(o) (GO:0000276);; Biological Process: response to hypoxia (GO:0001666);; Molecular Function: hydrogen ion transmembrane transporter activity (GO:0015078);; Biological Process: ATP synthesis coupled proton transport (GO:0015986);; Molecular Function: hydrolase activity (GO:0016787);;	K02129|1.71131e-22|ola:101155702|ATP synthase subunit e, mitochondrial-like; K02129 F-type H+-transporting ATPase subunit e (A)	ko00190:Oxidative phosphorylation	--	C	Energy production and conversion	unnamed protein product [Tetraodon nigroviridis]
socs3	222	109	5.2937	2.64777	0.00403033	-1.0638	down	--	--	Cellular Component: intracellular (GO:0005622);; Biological Process: protein ubiquitination (GO:0016567);; Biological Process: intracellular signal transduction (GO:0035556);; Biological Process: retina morphogenesis in camera-type eye (GO:0060042);;	K04696|1.43889e-152|mze:101468895|suppressor of cytokine signaling 3-like; K04696 suppressor of cytokine signaling 3 (A)	ko04120:Ubiquitin mediated proteolysis;ko04630:Jak-STAT signaling pathway;ko04910:Insulin signaling pathway;ko04920:Adipocytokine signaling pathway;ko05168:Herpes simplex infection	Suppressor of cytokine signaling 3 GN=SOCS3 OS=Gallus gallus (Chicken) PE=2 SV=1	T	Signal transduction mechanisms	PREDICTED: suppressor of cytokine signaling 3-like [Oreochromis niloticus]
dst	179	80	0.579533	0.272993	0.0014435	-1.19394	down	[Z]	Cytoskeleton	--	K10382|0|xma:102227876|dystonin-like; K10382 dystonin (A)	--	Alpha-actinin-4 GN=ACTN4 OS=Gallus gallus (Chicken) PE=1 SV=1	Z	Cytoskeleton	PREDICTED: dystonin-like [Oreochromis niloticus]
LOC100706525	470	74	6.80493	1.10115	0	-2.68845	down	--	--	--	--	--	--	R	General function prediction only	PREDICTED: arrestin domain-containing protein 3-like [Oreochromis niloticus]
LOC106097445	98	6	4.05963	0.213568	1.26565e-14	-3.74067	down	--	--	--	--	--	--	--	--	PREDICTED: hemicentin-2-like [Maylandia zebra]
LOC100704473	90	15	2.0409	0.364216	2.31043e-08	-2.50449	down	--	--	--	K06556|3.46477e-139|mze:101466542|OX-2 membrane glycoprotein-like; K06556 CD200 antigen (A)	--	Nectin-4 (Precursor) GN=pvrl4 OS=Xenopus tropicalis (Western clawed frog) PE=2 SV=2	R	General function prediction only	PREDICTED: OX-2 membrane glycoprotein-like [Oreochromis niloticus]
LOC106098638	1690	118	66.8169	4.66375	0	-3.87012	down	--	--	--	--	--	--	S	Function unknown	PREDICTED: uncharacterized protein LOC102082865 [Oreochromis niloticus]
megf10	105	252	1.10443	2.869	0.000321201	1.20087	up	--	--	--	--	--	Multiple epidermal growth factor-like domains protein 10 (Precursor) GN=megf10 OS=Xenopus tropicalis (Western clawed frog) PE=2 SV=1	T	Signal transduction mechanisms	PREDICTED: multiple epidermal growth factor-like domains protein 10-like [Oreochromis niloticus]
gpr19	402	97	8.67957	1.97774	8.43769e-15	-2.08115	down	--	--	Molecular Function: G-protein coupled receptor activity (GO:0004930);; Biological Process: G-protein coupled receptor signaling pathway (GO:0007186);; Cellular Component: integral component of membrane (GO:0016021);;	K04316|0|mze:101464650|probable G-protein coupled receptor 19-like; K04316 G protein-coupled receptor 19 (A)	--	Neuropeptide Y receptor type 2 GN=NPY2R OS=Gallus gallus (Chicken) PE=3 SV=1	T	Signal transduction mechanisms	PREDICTED: probable G-protein coupled receptor 19-like isoform X1 [Oreochromis niloticus]
csrnp3	183	71	2.57748	1.00694	5.68482e-05	-1.39389	down	--	--	--	K17494|0|mze:101464807|cysteine/serine-rich nuclear protein 3-like; K17494 cysteine/serine-rich nuclear protein (A)	--	--	K	Transcription	PREDICTED: cysteine/serine-rich nuclear protein 3-like isoform X1 [Oreochromis niloticus]
LOC100708740	690	1758	18.801	49.3073	7.74998e-08	1.29786	up	--	--	--	--	--	--	R	General function prediction only	PREDICTED: uncharacterized protein LOC102304283 [Haplochromis burtoni]
pln	417	185	10.4442	4.71529	2.24029e-05	-1.21429	down	--	--	Molecular Function: calcium channel regulator activity (GO:0005246);; Biological Process: negative regulation of heart rate (GO:0010459);; Biological Process: regulation of cardiac muscle contraction by regulation of the release of sequestered calcium ion (GO:0010881);; Cellular Component: integral component of membrane (GO:0016021);; Cellular Component: sarcoplasmic reticulum (GO:0016529);; Mole…	K05852|1.29796e-17|xma:102235433|cardiac phospholamban-like; K05852 phospholamban (A)	ko04020:Calcium signaling pathway;ko04261:Adrenergic signaling in cardiomyocytes	Cardiac phospholamban GN=PLN OS=Gallus gallus (Chicken) PE=2 SV=1	P	Inorganic ion transport and metabolism	PREDICTED: cardiac phospholamban-like [Takifugu rubripes]
LOC102079182	86	31	1.9951	0.762725	0.00337269	-1.47129	down	--	--	--	K06593|0|mze:101475280|poliovirus receptor-related protein 4-like; K06593 poliovirus receptor-related 4 (A)	ko04520:Adherens junction	Nectin-3-like protein (Precursor) GN=pvrl3l OS=Danio rerio (Zebrafish) PE=2 SV=2	T	Signal transduction mechanisms	PREDICTED: poliovirus receptor-related protein 2-like isoform X1 [Oreochromis niloticus]
LOC102081787	175	49	3.55614	0.669985	3.45054e-08	-1.84983	down	--	--	--	--	--	--	--	--	PREDICTED: uncharacterized protein LOC102081787 [Oreochromis niloticus]
acot7	276	57	7.51045	1.5685	8.10463e-15	-2.29087	down	[I]	Lipid transport and metabolism	--	K17360|0|mze:101466734|cytosolic acyl coenzyme A thioester hydrolase-like; K17360 acyl-coenzyme A thioesterase 7 [EC:3.1.2.2] (A)	ko00062:Fatty acid elongation;ko01040:Biosynthesis of unsaturated fatty acids	--	I	Lipid transport and metabolism	PREDICTED: cytosolic acyl coenzyme A thioester hydrolase-like isoform X2 [Oreochromis niloticus]
LOC100692599	2016	1013	30.1279	16.6263	7.38837e-05	-1.04096	down	--	--	Cellular Component: endoplasmic reticulum membrane (GO:0005789);; Cellular Component: integral component of membrane (GO:0016021);;	--	--	Erlin-1 {ECO:0000312|EMBL:CAX14336.1} OS=Danio rerio (Zebrafish) PE=2 SV=1	R	General function prediction only	PREDICTED: erlin-1-like isoform X1 [Oreochromis niloticus]
Tilapia_newGene_6342	94	30	3.41554	1.41095	0.000273954	-1.64208	down	--	--	--	K16631|8.10582e-17|mze:101474692|angiogenin-1-like; K16631 angiogenin [EC:3.1.27.-] (A)	--	LF-ZF3 {ECO:0000303|PubMed:20214681} (Precursor) OS=Danio rerio (Zebrafish) PE=1 SV=2	L	Replication, recombination and repair	PREDICTED: ribonuclease-like 3-like isoform X1 [Oreochromis niloticus]
LOC100697897	37	0	1.25085	0	2.1816e-07	-4.54415	down	[TZDR]	--	Molecular Function: calcium ion binding (GO:0005509);;	K13764|8.90675e-136|mze:101478379|recoverin-like; K13764 recoverin (A)	ko04744:Phototransduction	Visinin OS=Gallus gallus (Chicken) PE=2 SV=5	T	Signal transduction mechanisms	PREDICTED: recoverin-like [Oreochromis niloticus]
klf3	164	390	2.78972	6.73707	5.83295e-05	1.19225	up	[R]	General function prediction only	Molecular Function: binding (GO:0005488);;	K15605|2.97972e-113|tru:101072211|Krueppel-like factor 3-like; K15605 krueppel-like factor 3 (A)	--	Transcription factor Sp3 GN=SP3 OS=Gallus gallus (Chicken) PE=1 SV=1	K	Transcription	PREDICTED: Krueppel-like factor 3-like [Oreochromis niloticus]
LOC100702479	251	79	6.24011	1.90378	1.73323e-08	-1.69563	down	--	--	Molecular Function: sequence-specific DNA binding transcription factor activity (GO:0003700);; Cellular Component: nucleus (GO:0005634);; Biological Process: regulation of transcription, DNA-templated (GO:0006355);; Molecular Function: sequence-specific DNA binding (GO:0043565);; Biological Process: heart contraction (GO:0060047);;	K09028|0|mze:101477034|transcription factor jun-B-like; K09028 transcription factor jun-B (A)	--	Transcription factor jun-B GN=junb OS=Cyprinus carpio (Common carp) PE=2 SV=1	K	Transcription	PREDICTED: transcription factor jun-B-like isoform 1 [Oreochromis niloticus]
qsox1	387	946	5.46625	12.8728	1.33004e-06	1.2366	up	[OC]	--	Molecular Function: oxidoreductase activity, acting on a sulfur group of donors (GO:0016667);; Biological Process: single-organism metabolic process (GO:0044710);;	K10758|0|mze:101475862|sulfhydryl oxidase 1-like; K10758 thiol oxidase [EC:1.8.3.2] (A)	--	Sulfhydryl oxidase 1 (Precursor) GN=QSOX1 OS=Gallus gallus (Chicken) PE=1 SV=1	O	Posttranslational modification, protein turnover, chaperones	PREDICTED: sulfhydryl oxidase 1-like [Oreochromis niloticus]
LOC100699941	1939	748	58.8326	23.1715	1.06075e-09	-1.42149	down	--	--	Cellular Component: extracellular region (GO:0005576);; Biological Process: lipid transport (GO:0006869);; Molecular Function: lipid binding (GO:0008289);; Biological Process: lipoprotein metabolic process (GO:0042157);;	K04524|0|mze:101466239|apolipoprotein Eb-like; K04524 apolipoprotein E (A)	--	Apolipoprotein Eb (Precursor) GN=apoeb OS=Danio rerio (Zebrafish) PE=2 SV=1	T	Signal transduction mechanisms	PREDICTED: apolipoprotein Eb-like [Oreochromis niloticus]
LOC100704384	172	63	4.01394	1.50333	2.40439e-05	-1.47343	down	--	--	--	K14443|1.50101e-174|mze:101465039|protein BTG3-like; K14443 protein Tob/BTG (A)	ko03018:RNA degradation	Maternal B9.15 protein OS=Xenopus laevis (African clawed frog) PE=2 SV=1	T	Signal transduction mechanisms	PREDICTED: protein BTG3-like [Oreochromis niloticus]
gprc5c	116	33	1.45803	0.442413	4.99669e-06	-1.81033	down	--	--	--	K04620|0|mze:101479949|G-protein coupled receptor family C group 5 member C-like; K04620 G protein-coupled receptor family C group 5 member C (A)	--	--	T	Signal transduction mechanisms	PREDICTED: G-protein coupled receptor family C group 5 member C-like isoform X2 [Oreochromis niloticus]
LOC100706728	219	3	1.88789	0.0255759	0	-5.59789	down	[T]	Signal transduction mechanisms	--	K04907|0|mze:101465609|potassium voltage-gated channel subfamily H member 4-like; K04907 potassium voltage-gated channel Eag-related subfamily H member 4 (A)	--	Potassium voltage-gated channel subfamily H member 2 (Fragment) GN=KCNH2 OS=Gallus gallus (Chicken) PE=2 SV=1	P	Inorganic ion transport and metabolism	PREDICTED: potassium voltage-gated channel subfamily H member 4 isoform X1 [Oreochromis niloticus]
LOC100704679	55	15	0.913482	0.266139	0.00412256	-1.8105	down	[R]	General function prediction only	--	K15260|0|mze:101480317|poly [ADP-ribose] polymerase 9-like; K15260 poly [ADP-ribose] polymerase 9 [EC:2.4.2.30] (A)	--	O-acetyl-ADP-ribose deacetylase MACROD2 GN=macrod2 OS=Xenopus laevis (African clawed frog) PE=2 SV=1	K	Transcription	PREDICTED: poly [ADP-ribose] polymerase 9-like [Oreochromis niloticus]
LOC100707523	33	127	1.38938	5.16917	2.10028e-06	1.8436	up	--	--	--	--	--	Cartilage-associated protein (Precursor) GN=CRTAP OS=Gallus gallus (Chicken) PE=1 SV=1	R	General function prediction only	PREDICTED: synaptonemal complex protein SC65-like [Oreochromis niloticus]
sdc1	353	150	11.118	5.36348	1.27237e-05	-1.27442	down	--	--	--	--	--	--	--	--	PREDICTED: syndecan-2-like [Oreochromis niloticus]
LOC100697253	0	388	0	22.1188	0	7.82841	up	--	--	--	K16143|4.36227e-168|mze:101486301|C-reactive protein-like; K16143 C-reactive protein (A)	--	Jeltraxin (Precursor) OS=Lepidobatrachus laevis (Budgett&apos;s frog) PE=1 SV=1	R	General function prediction only	PREDICTED: C-reactive protein-like [Oreochromis niloticus]
fabp1	8385	18976	1036.37	2366.3	1.09431e-05	1.12878	up	--	--	Molecular Function: transporter activity (GO:0005215);; Molecular Function: fatty acid binding (GO:0005504);; Cellular Component: cytoplasm (GO:0005737);; Biological Process: transport (GO:0006810);;	K08750|1.92924e-79|mze:101479033|fatty acid-binding protein, liver-type-like; K08750 fatty acid-binding protein 1, liver (A)	ko03320:PPAR signaling pathway	Fatty acid-binding protein, liver-type GN=fabp1 OS=Epinephelus coioides (Orange-spotted grouper) PE=2 SV=1	I	Lipid transport and metabolism	PREDICTED: fatty acid-binding protein, liver-type-like [Oreochromis niloticus]
ror2	267	71	3.35049	0.883591	4.95085e-11	-1.9348	down	[RTKL]	--	--	K05123|0|mze:101472927|tyrosine-protein kinase transmembrane receptor ROR2-like; K05123 receptor tyrosine kinase-like orphan receptor 2 [EC:2.7.10.1] (A)	--	Muscle, skeletal receptor tyrosine protein kinase (Precursor) GN=MUSK OS=Gallus gallus (Chicken) PE=2 SV=1	T	Signal transduction mechanisms	PREDICTED: tyrosine-protein kinase transmembrane receptor ROR2-like [Neolamprologus brichardi]
LOC100694310	323	150	4.78675	2.23151	0.00023393	-1.14691	down	[R]	General function prediction only	--	K05039|0|mze:101486609|sodium- and chloride-dependent GABA transporter 2-like; K05039 solute carrier family 6 (neurotransmitter transporter, GABA) member 6/8/11/12/13 (A)	--	Creatine transporter OS=Torpedo marmorata (Marbled electric ray) PE=2 SV=1	T	Signal transduction mechanisms	PREDICTED: sodium- and chloride-dependent GABA transporter 2 isoform X1 [Oreochromis niloticus]
LOC102076312	54	153	2.98863	8.76813	0.000162286	1.42562	up	--	--	--	--	--	--	R	General function prediction only	PREDICTED: V-set domain-containing T-cell activation inhibitor 1-like [Oreochromis niloticus]
LOC100703209	2443	1036	93.3453	39.1527	6.3564e-08	-1.28558	down	--	--	Cellular Component: connexon complex (GO:0005922);; Biological Process: cell communication (GO:0007154);; Cellular Component: integral component of membrane (GO:0016021);;	K07612|0|mze:101487832|gap junction Cx32.7 protein-like; K07612 gap junction protein, alpha 3 (A)	--	Gap junction Cx32.7 protein OS=Micropogonias undulatus (Atlantic croaker) PE=2 SV=3	S	Function unknown	PREDICTED: gap junction Cx32.7 protein-like [Oreochromis niloticus]
LOC100703714	147	307	3.26564	9.61961	0.00408976	1.00493	up	[V]	Defense mechanisms	Biological Process: drug transmembrane transport (GO:0006855);; Molecular Function: drug transmembrane transporter activity (GO:0015238);; Molecular Function: antiporter activity (GO:0015297);; Cellular Component: membrane (GO:0016020);;	K03327|0|mze:101467276|multidrug and toxin extrusion protein 1-like; K03327 multidrug resistance protein, MATE family (A)	--	Multidrug and toxin extrusion protein 1 GN=slc47a1 OS=Danio rerio (Zebrafish) PE=2 SV=1	P	Inorganic ion transport and metabolism	PREDICTED: multidrug and toxin extrusion protein 1-like [Oreochromis niloticus]
LOC100696673	133	15	1.19366	0.140371	1.35447e-14	-3.05946	down	[E]	Amino acid transport and metabolism	Biological Process: proteolysis (GO:0006508);; Molecular Function: metallopeptidase activity (GO:0008237);; Molecular Function: zinc ion binding (GO:0008270);;	K11140|0|mze:101469966|aminopeptidase N-like; K11140 aminopeptidase N [EC:3.4.11.2] (A)	ko00480:Glutathione metabolism;ko04614:Renin-angiotensin system	Aminopeptidase N {ECO:0000312|EMBL:ACZ95799.1} GN=ANPEP OS=Gallus gallus (Chicken) PE=1 SV=1	O	Posttranslational modification, protein turnover, chaperones	PREDICTED: aminopeptidase N-like [Oreochromis niloticus]
LOC100692029	759	361	17.394	9.05709	3.4332e-05	-1.11777	down	--	--	Cellular Component: membrane (GO:0016020);; Molecular Function: transferase activity, transferring glycosyl groups (GO:0016757);;	K07820|0|mze:101485606|beta-1,3-galactosyltransferase 2-like; K07820 beta-1,3-galactosyltransferase 2 [EC:2.4.1.-] (A)	ko00601:Glycosphingolipid biosynthesis - lacto and neolacto series	Lactosylceramide 1,3-N-acetyl-beta-D-glucosaminyltransferase GN=b3gnt5 OS=Xenopus tropicalis (Western clawed frog) PE=2 SV=1	G	Carbohydrate transport and metabolism	PREDICTED: beta-1,3-galactosyltransferase 2-like isoform X1 [Oreochromis niloticus]
thbs1a	1079	83	8.18756	0.649168	0	-3.72251	down	--	--	Molecular Function: calcium ion binding (GO:0005509);; Cellular Component: extracellular region (GO:0005576);; Biological Process: cell adhesion (GO:0007155);;	K16857|0|mze:101472122|thrombospondin-1-like; K16857 thrombospondin 1 (A)	ko04115:p53 signaling pathway;ko04145:Phagosome;ko04350:TGF-beta signaling pathway;ko04510:Focal adhesion;ko04512:ECM-receptor interaction	Thrombospondin-1 (Precursor) GN=thbs1 OS=Xenopus laevis (African clawed frog) PE=2 SV=1	W	Extracellular structures	thrombospondin-1a precursor [Oreochromis niloticus]
LOC100707262	157	417	1.8668	5.36515	1.4714e-06	1.3507	up	--	--	Molecular Function: G-protein coupled receptor activity (GO:0004930);; Molecular Function: olfactory receptor activity (GO:0004984);; Cellular Component: plasma membrane (GO:0005886);; Biological Process: G-protein coupled receptor signaling pathway (GO:0007186);; Biological Process: visual perception (GO:0007601);; Molecular Function: photoreceptor activity (GO:0009881);; Cellular Component: int…	K04255|0|mze:101470827|melanopsin-A-like; K04255 r-opsin (A)	--	Melanopsin-A OS=Danio rerio (Zebrafish) PE=2 SV=3	R	General function prediction only	PREDICTED: melanopsin-A-like isoform X2 [Oreochromis niloticus]
pcsk9	57	365	1.17775	6.91996	0	2.59493	up	[O]	Posttranslational modification, protein turnover, chaperones	Molecular Function: serine-type endopeptidase activity (GO:0004252);; Biological Process: proteolysis (GO:0006508);; Molecular Function: identical protein binding (GO:0042802);; Biological Process: negative regulation of catalytic activity (GO:0043086);;	K13050|0|mze:101486231|proprotein convertase subtilisin/kexin type 9-like; K13050 proprotein convertase subtilisin/kexin type 9 [EC:3.4.21.-] (A)	--	--	O	Posttranslational modification, protein turnover, chaperones	PREDICTED: proprotein convertase subtilisin/kexin type 9-like [Oreochromis niloticus]
LOC100693418	96	277	5.70486	17.3543	1.44649e-06	1.46364	up	[F]	Nucleotide transport and metabolism	Molecular Function: cytidine deaminase activity (GO:0004126);; Molecular Function: zinc ion binding (GO:0008270);; Biological Process: cytidine deamination (GO:0009972);;	K01489|4.19296e-114|mze:101485793|cytidine deaminase-like; K01489 cytidine deaminase [EC:3.5.4.5] (A)	ko00240:Pyrimidine metabolism;ko00983:Drug metabolism - other enzymes	--	F	Nucleotide transport and metabolism	PREDICTED: cytidine deaminase-like [Oreochromis niloticus]
pnkd	169	380	14.0486	30.2394	0.000310524	1.11204	up	--	--	--	--	--	--	152	Function unknown	PREDICTED: probable hydrolase PNKD [Larimichthys crocea]
LOC102078359	126	362	2.68681	7.89294	2.70143e-07	1.46118	up	--	--	Molecular Function: nucleic acid binding (GO:0003676);; Molecular Function: protein dimerization activity (GO:0046983);;	--	--	--	1109	Replication, recombination and repair	PREDICTED: zinc finger BED domain-containing protein 1-like [Oreochromis niloticus]
mpp1	294	141	4.91572	2.46344	0.000781579	-1.10015	down	[F]	Nucleotide transport and metabolism	Cellular Component: membrane (GO:0016020);;	--	--	55 kDa erythrocyte membrane protein GN=mpp1 OS=Takifugu rubripes (Japanese pufferfish) PE=3 SV=1	T	Signal transduction mechanisms	PREDICTED: 55 kDa erythrocyte membrane protein-like isoform 1 [Oreochromis niloticus]
LOC100698511	55	13	0.53025	0.13835	0.000992055	-1.99436	down	--	--	--	--	--	Protein FAM46C GN=fam46c OS=Danio rerio (Zebrafish) PE=2 SV=1	S	Function unknown	PREDICTED: protein FAM46A-like [Oreochromis niloticus]
LOC100708540	116	255	8.52764	13.2593	0.00239651	1.07622	up	--	--	--	K05849|0|mze:101467086|sodium/calcium exchanger 2-like; K05849 solute carrier family 8 (sodium/calcium exchanger) (A)	ko04020:Calcium signaling pathway	Sodium/potassium/calcium exchanger 2 GN=SLC24A2 OS=Gallus gallus (Chicken) PE=2 SV=1	T	Signal transduction mechanisms	PREDICTED: sodium/calcium exchanger 2-like [Oreochromis niloticus]
adgrl3	41	129	0.24008	0.744709	8.0692e-05	1.56621	up	--	--	--	K04594|0|mze:101465762|latrophilin-3-like; K04594 latrophilin 3 (A)	--	Noelin (Precursor) GN=OLFM1 OS=Gallus gallus (Chicken) PE=2 SV=1	W	Extracellular structures	PREDICTED: latrophilin-3-like isoform X1 [Oreochromis niloticus]
tmeff2	406	842	14.3471	29.2051	0.000481221	1.00004	up	--	--	--	--	--	Tomoregulin-1 (Precursor) GN=tmeff1 OS=Xenopus laevis (African clawed frog) PE=1 SV=2	R	General function prediction only	PREDICTED: tomoregulin-2-like isoform X2 [Oreochromis niloticus]
vasn	326	86	3.85358	1.0544	3.32034e-12	-1.95065	down	[S]	Function unknown	--	--	--	Vasorin (Precursor) GN=vasn OS=Xenopus tropicalis (Western clawed frog) PE=2 SV=1	T	Signal transduction mechanisms	PREDICTED: vasorin-like [Oreochromis niloticus]
LOC100692269	112	39	1.19595	0.432324	0.000263031	-1.53042	down	--	--	--	K05622|0|mze:101483349|protein-glutamine gamma-glutamyltransferase E-like; K05622 transglutaminase 5 [EC:2.3.2.13] (A)	--	Protein-glutamine gamma-glutamyltransferase 2 GN=TGL2 OS=Gallus gallus (Chicken) PE=1 SV=3	O	Posttranslational modification, protein turnover, chaperones	PREDICTED: protein-glutamine gamma-glutamyltransferase 5-like isoform X1 [Oreochromis niloticus]
LOC102078932	27	111	1.57582	5.6679	2.92911e-06	1.92636	up	--	--	--	--	--	Ig lambda chain C region OS=Gallus gallus (Chicken) PE=4 SV=1	R	General function prediction only	PREDICTED: immunoglobulin lambda-like polypeptide 1-like [Oreochromis niloticus]
ptprq	1140	223	4.7313	0.906837	0	-2.39432	down	[T]	Signal transduction mechanisms	--	K16910|0|mze:101483016|phosphatidylinositol phosphatase PTPRQ-like; K16910 receptor-type tyrosine-protein phosphatase Q [EC:3.1.3.48] (A)	--	Receptor-type tyrosine-protein phosphatase eta (Precursor) GN=PTPRJ OS=Gallus gallus (Chicken) PE=2 SV=2	T	Signal transduction mechanisms	PREDICTED: phosphatidylinositol phosphatase PTPRQ-like isoform X1 [Maylandia zebra]
LOC100696943	35	6	0.634556	0.113079	0.00700335	-2.29778	down	--	--	Molecular Function: protein dimerization activity (GO:0046983);;	K09114|9.43419e-150|mze:101483773|max-interacting protein 1-like; K09114 MAX dimerization protein (A)	--	Max-interacting protein 1 GN=mxi1 OS=Danio rerio (Zebrafish) PE=2 SV=1	K	Transcription	PREDICTED: max-interacting protein 1-like [Oreochromis niloticus]
LOC100704129	255	588	11.2549	25.5869	3.5997e-05	1.15082	up	--	--	--	K12801|1.23177e-14|mze:101481150|NACHT, LRR and PYD domains-containing protein 1-like; K12801 caspase recruitment domain-containing protein 8 (A)	ko04621:NOD-like receptor signaling pathway	--	D	Cell cycle control, cell division, chromosome partitioning	PREDICTED: caspase-1-like isoform X1 [Oreochromis niloticus]
phox2a	100	38	1.31686	0.483594	0.00256697	-1.40532	down	[K]	Transcription	Molecular Function: sequence-specific DNA binding transcription factor activity (GO:0003700);; Cellular Component: nucleus (GO:0005634);; Biological Process: regulation of transcription, DNA-templated (GO:0006355);; Biological Process: brain development (GO:0007420);; Molecular Function: sequence-specific DNA binding (GO:0043565);;	K09330|1.80275e-170|xma:102221834|paired mesoderm homeobox protein 2A-like; K09330 paired mesoderm homeobox protein 2 (A)	--	Aristaless-related homeobox protein GN=arx OS=Danio rerio (Zebrafish) PE=2 SV=1	K	Transcription	PREDICTED: paired mesoderm homeobox protein 2A [Stegastes partitus]
neto1	169	50	3.18437	1.26422	1.93751e-07	-1.77181	down	--	--	--	--	--	Dorsal-ventral patterning tolloid-like protein 1 (Precursor) GN=tll1 OS=Danio rerio (Zebrafish) PE=2 SV=1	T	Signal transduction mechanisms	PREDICTED: neuropilin (NRP) and tolloid (TLL)-like 1 isoform X2 [Oreochromis niloticus]
rhoh	266	134	5.43063	3.01415	0.00366778	-1.02917	down	[R]	General function prediction only	--	K07873|1.48188e-142|mze:101480731|rho-related GTP-binding protein RhoH-like; K07873 Ras homolog gene family, member H (A)	--	Cell division control protein 42 homolog (Precursor) GN=CDC42 OS=Gallus gallus (Chicken) PE=2 SV=1	R	General function prediction only	PREDICTED: rho-related GTP-binding protein RhoH-like isoform X1 [Oreochromis niloticus]
LOC100699236	856	153	31.1673	5.39785	0	-2.52015	down	--	--	--	--	--	--	S	Function unknown	PREDICTED: uncharacterized protein C11orf96 homolog [Oreochromis niloticus]
LOC100699797	300	124	4.85886	2.24886	1.31923e-05	-1.31211	down	--	--	--	K09058|0|mze:101466059|transcription factor VBP-like; K09058 thyrotrophic embryonic factor (A)	--	Transcription factor VBP GN=TEF OS=Gallus gallus (Chicken) PE=1 SV=2	K	Transcription	PREDICTED: transcription factor VBP-like isoform X2 [Oreochromis niloticus]
LOC100710639	393	163	5.22535	2.1274	3.58039e-06	-1.30999	down	[Z]	Cytoskeleton	Molecular Function: motor activity (GO:0003774);; Molecular Function: actin binding (GO:0003779);; Molecular Function: calmodulin binding (GO:0005516);; Molecular Function: ATP binding (GO:0005524);; Cellular Component: myofibril (GO:0030016);; Cellular Component: myosin filament (GO:0032982);;	K10352|0|mze:101477534|myosin heavy chain, fast skeletal muscle-like; K10352 myosin heavy chain (A)	ko04530:Tight junction	Myosin heavy chain, fast skeletal muscle OS=Cyprinus carpio (Common carp) PE=2 SV=2	Z	Cytoskeleton	PREDICTED: myosin heavy chain, fast skeletal muscle-like [Oreochromis niloticus]
Tilapia_newGene_8967	24	157	0.684657	4.1557	1.63036e-12	2.57966	up	--	--	Molecular Function: nucleotide binding (GO:0000166);; Molecular Function: helicase activity (GO:0004386);; Molecular Function: nuclease activity (GO:0004518);; Biological Process: DNA metabolic process (GO:0006259);; Biological Process: single-organism cellular process (GO:0044763);;	--	--	--	D	Cell cycle control, cell division, chromosome partitioning	PREDICTED: uncharacterized protein LOC102076606 isoform X1 [Oreochromis niloticus]
LOC100692286	325	127	4.25536	2.49318	1.59286e-06	-1.39296	down	[R]	General function prediction only	Molecular Function: GTP binding (GO:0005525);; Cellular Component: intracellular (GO:0005622);; Biological Process: small GTPase mediated signal transduction (GO:0007264);;	K07958|3.97789e-129|mze:101485920|ADP-ribosylation factor-like protein 10-like; K07958 ADP-ribosylation factor-like protein 10 (A)	--	ADP-ribosylation factor-like protein 3 GN=arl3 OS=Xenopus laevis (African clawed frog) PE=2 SV=1	R	General function prediction only	PREDICTED: ADP-ribosylation factor-like protein 10-like [Oreochromis niloticus]
arhgef9	496	1085	13.3265	26.9061	5.7574e-05	1.07739	up	--	--	--	--	--	Triple functional domain protein GN=trio OS=Danio rerio (Zebrafish) PE=3 SV=1	T	Signal transduction mechanisms	PREDICTED: rho guanine nucleotide exchange factor 9-like isoform X1 [Pundamilia nyererei]
LOC102082076	200	91	3.73693	2.01448	0.00121404	-1.17039	down	--	--	Molecular Function: calcium ion binding (GO:0005509);; Molecular Function: GTP binding (GO:0005525);; Biological Process: small GTPase mediated signal transduction (GO:0007264);; Biological Process: protein transport (GO:0015031);; Cellular Component: integral component of membrane (GO:0016021);; Biological Process: cell migration involved in gastrulation (GO:0042074);; Biological Process: epibol…	--	--	--	T	Signal transduction mechanisms	PREDICTED: multiple epidermal growth factor-like domains protein 8-like [Oreochromis niloticus]
otx1	739	379	11.9145	5.91371	0.000421003	-1.00945	down	--	--	Biological Process: retinal pigment epithelium development (GO:0003406);; Molecular Function: sequence-specific DNA binding transcription factor activity (GO:0003700);; Cellular Component: nucleus (GO:0005634);; Biological Process: regulation of transcription, DNA-templated (GO:0006355);; Biological Process: inner ear morphogenesis (GO:0042472);; Molecular Function: sequence-specific DNA binding …	K09326|3.95224e-160|xma:102229947|homeobox protein OTX1 B-like; K09326 homeobox protein OTX1 (A)	--	Homeobox protein OTX1 B GN=otx1b OS=Danio rerio (Zebrafish) PE=2 SV=1	K	Transcription	PREDICTED: homeobox protein OTX1 B-like isoform X2 [Maylandia zebra]
aplp2	3057	774	31.5583	8.1008	0	-2.02866	down	--	--	Molecular Function: serine-type endopeptidase inhibitor activity (GO:0004867);; Molecular Function: heparin binding (GO:0008201);; Cellular Component: integral component of membrane (GO:0016021);; Molecular Function: transition metal ion binding (GO:0046914);;	K08117|0|mze:101478143|amyloid-like protein 2-like; K08117 amyloid beta (A4) precursor-like protein 2 (A)	--	Beta-amyloid protein (Precursor) GN=app OS=Takifugu rubripes (Japanese pufferfish) PE=3 SV=1	R	General function prediction only	PREDICTED: amyloid-like protein 2-like isoform X2 [Oreochromis niloticus]
lats1	172	484	1.40141	3.78759	9.63267e-08	1.43451	up	[RTKL]	--	Molecular Function: protein serine/threonine kinase activity (GO:0004674);; Molecular Function: ATP binding (GO:0005524);; Biological Process: protein phosphorylation (GO:0006468);;	K08791|0|mze:101474756|serine/threonine-protein kinase LATS1-like; K08791 serine/threonine-protein kinase LATS1/2 [EC:2.7.11.1] (A)	--	Microtubule-associated serine/threonine-protein kinase 3 GN=mast3 OS=Xenopus laevis (African clawed frog) PE=2 SV=1	D	Cell cycle control, cell division, chromosome partitioning	PREDICTED: serine/threonine-protein kinase LATS1 [Oreochromis niloticus]
LOC100698894	186	470	4.79938	12.8728	4.18136e-06	1.28046	up	--	--	--	K00901|0|mze:101478098|diacylglycerol kinase beta-like; K00901 diacylglycerol kinase (ATP) [EC:2.7.1.107] (A)	ko00561:Glycerolipid metabolism;ko00564:Glycerophospholipid metabolism;ko04070:Phosphatidylinositol signaling system	Protein kinase C beta type GN=prkcbb OS=Danio rerio (Zebrafish) PE=2 SV=1	T	Signal transduction mechanisms	PREDICTED: diacylglycerol kinase beta-like isoform X4 [Haplochromis burtoni]
LOC102078600	2	71	0.0622239	1.86256	3.99747e-12	4.26419	up	--	--	--	--	--	V-set and immunoglobulin domain-containing protein 1 (Precursor) GN=vsig1 OS=Xenopus laevis (African clawed frog) PE=2 SV=1	R	General function prediction only	PREDICTED: CD276 antigen homolog isoform X1 [Oreochromis niloticus]
LOC100707989	246	674	3.82735	10.9403	5.19773e-08	1.39872	up	--	--	Cellular Component: endoplasmic reticulum membrane (GO:0005789);; Cellular Component: integral component of membrane (GO:0016021);; Biological Process: dephosphorylation (GO:0016311);; Molecular Function: phosphatase activity (GO:0016791);;	--	--	Phosphatidylinositide phosphatase SAC1-A GN=sacm1la OS=Danio rerio (Zebrafish) PE=2 SV=1	I	Lipid transport and metabolism	PREDICTED: phosphatidylinositide phosphatase SAC1-A-like isoform X1 [Oreochromis niloticus]
LOC102082825	109	41	1.07304	0.401638	0.00119818	-1.42265	down	--	--	--	--	--	--	S	Function unknown	PREDICTED: niban-like protein 1-like [Oreochromis niloticus]
faap20	384	801	11.1433	22.1992	0.000434026	1.00821	up	--	--	--	--	--	--	78	Function unknown	PREDICTED: uncharacterized protein LOC102793603 [Neolamprologus brichardi]
lage3	282	670	27.4331	68.0125	9.16829e-06	1.19435	up	--	--	--	K15902|4.25337e-60|mze:101482998|L antigen family member 3-like; K15902 EKC/KEOPS complex subunit PCC1/LAGE3 (A)	--	--	S	Function unknown	PREDICTED: L antigen family member 3-like [Oreochromis niloticus]
LOC106098181	530	179	19.318	6.23018	4.24656e-10	-1.60614	down	--	--	--	--	--	Torsin-4A GN=tor4a OS=Xenopus tropicalis (Western clawed frog) PE=2 SV=1	405	Function unknown	PREDICTED: uncharacterized protein LOC102787380 [Neolamprologus brichardi]
Tilapia_newGene_581	165	72	6.20322	2.26929	0.0013607	-1.22622	down	--	--	--	--	--	Transposon TX1 uncharacterized 149 kDa protein OS=Xenopus laevis (African clawed frog) PE=3 SV=1	R	General function prediction only	pol-like protein [Danio rerio]
LOC106096624	744	213	13.5915	3.68011	2.91989e-14	-1.84545	down	--	--	--	--	--	--	S	Function unknown	PREDICTED: uncharacterized protein LOC102080506 isoform X1 [Oreochromis niloticus]
tmem132e	2612	914	26.0926	12.1969	4.98324e-12	-1.56246	down	--	--	--	K17599|0|mze:101480769|transmembrane protein 132E-like; K17599 transmembrane protein 132 (A)	--	--	S	Function unknown	PREDICTED: transmembrane protein 132E [Oreochromis niloticus]
LOC100695925	2	28	0.114273	1.36444	0.00385763	2.97311	up	--	--	--	--	--	--	--	--	PREDICTED: low affinity immunoglobulin gamma Fc region receptor II-like isoform X2 [Oreochromis niloticus]
LOC102077879	50	12	3.34875	0.91918	0.00284896	-1.96261	down	--	--	--	--	--	--	K	Transcription	PREDICTED: zinc finger protein with KRAB and SCAN domains 8-like [Oreochromis niloticus]
LOC102080487	3	30	0.0520599	0.415024	0.00562311	2.71834	up	[L]	Replication, recombination and repair	Molecular Function: transporter activity (GO:0005215);; Biological Process: transport (GO:0006810);; Cellular Component: synaptic vesicle (GO:0008021);; Cellular Component: membrane (GO:0016020);;	--	--	--	R	General function prediction only	PREDICTED: uncharacterized protein LOC102076140 [Oreochromis niloticus]
LOC102079892	1753	789	18.3964	8.53135	1.12341e-06	-1.19932	down	--	--	--	K04271|0|mze:101471380|P2Y purinoceptor 4-like; K04271 pyrimidinergic receptor P2Y, G protein-coupled, 4 (A)	ko04080:Neuroactive ligand-receptor interaction	P2Y purinoceptor 1 GN=P2RY1 OS=Gallus gallus (Chicken) PE=2 SV=1	R	General function prediction only	PREDICTED: P2Y purinoceptor 4-like [Oreochromis niloticus]
LOC100701997	37	121	0.558071	1.68773	6.91584e-05	1.61715	up	--	--	--	--	--	--	R	General function prediction only	PREDICTED: uncharacterized protein LOC100701997 [Oreochromis niloticus]
nek10	167	16	2.18544	0.187649	0	-3.30044	down	[RTKL]	--	--	K08857|0|mze:101477302|serine/threonine-protein kinase Nek10-like; K08857 NIMA (never in mitosis gene a)-related kinase [EC:2.7.11.1] (A)	--	Serine/threonine-protein kinase Nek8 GN=nek8 OS=Danio rerio (Zebrafish) PE=2 SV=1	T	Signal transduction mechanisms	PREDICTED: serine/threonine-protein kinase Nek10 isoform X1 [Oreochromis niloticus]
slc26a6	131	38	2.29156	0.686202	1.96494e-06	-1.78931	down	[P]	Inorganic ion transport and metabolism	--	K14704|0|mze:101470130|solute carrier family 26 member 6-like; K14704 solute carrier family 26 (sulfate anion transporter), member 6 (A)	--	Solute carrier family 26 member 9 GN=slc26a9 OS=Xenopus tropicalis (Western clawed frog) PE=2 SV=1	P	Inorganic ion transport and metabolism	PREDICTED: solute carrier family 26 member 6-like [Oreochromis niloticus]
folh1b	238	77	3.80235	1.24536	6.38118e-08	-1.65562	down	--	--	Biological Process: proteolysis (GO:0006508);; Molecular Function: peptidase activity (GO:0008233);;	--	--	Transferrin receptor protein 1 GN=TFRC OS=Gallus gallus (Chicken) PE=2 SV=2	P	Inorganic ion transport and metabolism	PREDICTED: glutamate carboxypeptidase 2-like isoform X1 [Oreochromis niloticus]
LOC106098083	54	309	1.68301	9.30197	1.11022e-16	2.4316	up	--	--	--	--	--	--	W	Extracellular structures	PREDICTED: thrombospondin-type laminin G domain and EAR repeat-containing protein-like isoform X1 [Haplochromis burtoni]
tnfaip3	462	227	3.67329	1.75603	0.00033287	-1.06887	down	--	--	Molecular Function: DNA binding (GO:0003677);; Molecular Function: zinc ion binding (GO:0008270);;	K11859|0|tru:101062530|tumor necrosis factor alpha-induced protein 3-like; K11859 tumor necrosis factor, alpha-induced protein 3 [EC:3.4.19.12 6.3.2.19] (A)	ko04621:NOD-like receptor signaling pathway	Ubiquitin thioesterase zranb1-B GN=zranb1-b OS=Xenopus laevis (African clawed frog) PE=2 SV=1	T	Signal transduction mechanisms	PREDICTED: tumor necrosis factor alpha-induced protein 3 isoform X1 [Oreochromis niloticus]
evc2	506	1057	4.99039	10.2224	0.000281635	1.01103	up	--	--	--	--	--	--	R	General function prediction only	PREDICTED: limbin-like isoform X1 [Oreochromis niloticus]
LOC100698612	52	13	0.790854	0.222404	0.00290275	-1.91587	down	[GEPR]	--	Cellular Component: integral component of membrane (GO:0016021);; Molecular Function: transmembrane transporter activity (GO:0022857);; Biological Process: transmembrane transport (GO:0055085);;	K08202|0|mze:101479579|solute carrier family 22 member 6-like; K08202 MFS transporter, OCT family, solute carrier family 22 (organic cation transporter), member 4/5 (A)	--	Solute carrier family 22 member 6-B GN=slc22a6-b OS=Xenopus laevis (African clawed frog) PE=2 SV=1	R	General function prediction only	PREDICTED: solute carrier family 22 member 6-like [Neolamprologus brichardi]
LOC100710716	3	30	0.0726158	0.629398	0.00562311	2.71834	up	--	--	--	K14525|7.40019e-175|mze:101470544|ribonuclease P protein subunit p25-like; K14525 ribonucleases P/MRP protein subunit RPP25 [EC:3.1.26.5] (A)	ko03008:Ribosome biogenesis in eukaryotes;ko03013:RNA transport	--	A	RNA processing and modification	PREDICTED: ribonuclease P protein subunit p25-like [Oreochromis niloticus]
LOC102078891	38	4	0.829742	0.098449	0.00017714	-2.84421	down	--	--	--	K17592|0|mze:101467601|sacsin-like; K17592 sacsin (A)	--	--	R	General function prediction only	PREDICTED: sacsin-like [Oreochromis niloticus]
cpne8	124	22	1.03619	0.210635	2.55198e-10	-2.455	down	--	--	--	--	--	--	T	Signal transduction mechanisms	PREDICTED: copine-8-like isoform X1 [Oreochromis niloticus]
Tilapia_newGene_1	589	124	13.9887	3.05183	0	-2.28152	down	[C]	Energy production and conversion	Molecular Function: cytochrome-c oxidase activity (GO:0004129);; Molecular Function: iron ion binding (GO:0005506);; Cellular Component: mitochondrial inner membrane (GO:0005743);; Biological Process: oxidative phosphorylation (GO:0006119);; Molecular Function: electron carrier activity (GO:0009055);; Biological Process: aerobic respiration (GO:0009060);; Cellular Component: integral component of…	K02256|0|ola:805432|COX1; cytochrome c oxidase subunit I; K02256 cytochrome c oxidase subunit 1 [EC:1.9.3.1] (A)	ko00190:Oxidative phosphorylation;ko04260:Cardiac muscle contraction	Cytochrome c oxidase subunit 1 GN=mt-co1 OS=Salmo salar (Atlantic salmon) PE=3 SV=1	C	Energy production and conversion	cytochrome c oxidase subunit I (mitochondrion) [Oryzias melastigma]
LOC100699899	94	30	1.66691	0.344727	0.000273954	-1.64208	down	[T]	Signal transduction mechanisms	Biological Process: ossification (GO:0001503);; Molecular Function: guanylate cyclase activity (GO:0004383);; Molecular Function: protein kinase activity (GO:0004672);; Molecular Function: ATP binding (GO:0005524);; Molecular Function: GTP binding (GO:0005525);; Biological Process: cGMP biosynthetic process (GO:0006182);; Biological Process: protein phosphorylation (GO:0006468);; Biological Proce…	K12324|0|mze:101476270|atrial natriuretic peptide receptor 2-like; K12324 atrial natriuretic peptide receptor B [EC:4.6.1.2] (A)	ko00230:Purine metabolism;ko04270:Vascular smooth muscle contraction	Atrial natriuretic peptide receptor 2 (Precursor) GN=npr2 OS=Anguilla japonica (Japanese eel) PE=2 SV=1	T	Signal transduction mechanisms	PREDICTED: atrial natriuretic peptide receptor 2-like [Oreochromis niloticus]
LOC100710485	359	161	4.26671	2.07715	5.73001e-05	-1.19764	down	--	--	--	--	--	Transmembrane anterior posterior transformation protein 1 homolog GN=tapt1 OS=Danio rerio (Zebrafish) PE=3 SV=1	S	Function unknown	PREDICTED: transmembrane anterior posterior transformation protein 1 homolog isoform X2 [Oreochromis niloticus]
LOC100704464	512	1154	82.7818	186.845	1.82843e-05	1.12055	up	--	--	Biological Process: multi-organism process (GO:0051704);;	--	--	Moronecidin (Precursor) OS=Morone saxatilis (Striped bass) PE=1 SV=1	--	--	PREDICTED: moronecidin-like [Oreochromis niloticus]
LOC100696237	0	47	0	1.35624	3.14212e-09	4.82842	up	--	--	Molecular Function: carbohydrate binding (GO:0030246);;	--	--	Ladderlectin (Precursor) OS=Oncorhynchus mykiss (Rainbow trout) PE=1 SV=2	R	General function prediction only	PREDICTED: type-2 ice-structuring protein-like [Oreochromis niloticus]
LOC106098826	291	1	23.0823	0.0488466	0	-6.80169	down	--	--	--	--	--	--	S	Function unknown	PREDICTED: uncharacterized protein LOC102289477 [Haplochromis burtoni]
cspp1	269	131	2.4187	1.14628	0.00159492	-1.07749	down	--	--	--	K16771|0|mze:101470577|centrosome and spindle pole-associated protein 1-like; K16771 centrosome and spindle pole-associated protein 1 (A)	--	--	S	Function unknown	PREDICTED: centrosome and spindle pole-associated protein 1-like isoform X1 [Oreochromis niloticus]
LOC100703454	196	85	18.6646	7.54058	0.000465737	-1.23801	down	--	--	Molecular Function: calcium ion binding (GO:0005509);;	--	--	Protein S100-A11 GN=S100A11 OS=Gallus gallus (Chicken) PE=1 SV=2	130	Function unknown	PREDICTED: protein S100-A1-like isoform X1 [Oreochromis niloticus]
tbc1d22b	313	156	4.09418	2.16357	0.00163408	-1.04582	down	[R]	General function prediction only	Molecular Function: Rab GTPase activator activity (GO:0005097);; Biological Process: positive regulation of Rab GTPase activity (GO:0032851);;	--	--	TBC domain-containing protein kinase-like protein OS=Gallus gallus (Chicken) PE=2 SV=2	U	Intracellular trafficking, secretion, and vesicular transport	PREDICTED: TBC1 domain family member 22B [Oreochromis niloticus]
LOC100704016	65	9	1.67528	0.276881	5.10809e-07	-2.68653	down	[E]	Amino acid transport and metabolism	Molecular Function: metallocarboxypeptidase activity (GO:0004181);; Biological Process: proteolysis (GO:0006508);; Molecular Function: zinc ion binding (GO:0008270);;	K01298|0|mze:101471320|carboxypeptidase A2-like; K01298 carboxypeptidase A2 [EC:3.4.17.15] (A)	--	--	R	General function prediction only	PREDICTED: carboxypeptidase A2-like [Oreochromis niloticus]
LOC102076641	154	1	4.34449	0.0446746	0	-5.89085	down	--	--	--	--	--	--	304	Function unknown	PREDICTED: leucine-rich repeat neuronal protein 4-like isoform X1 [Oreochromis niloticus]
gpx3	587	287	31.2666	15.4615	0.000152576	-1.07714	down	[O]	Posttranslational modification, protein turnover, chaperones	Molecular Function: glutathione peroxidase activity (GO:0004602);; Biological Process: response to oxidative stress (GO:0006979);; Biological Process: oxidation-reduction process (GO:0055114);;	K00432|2.37215e-145|mze:101475490|glutathione peroxidase 3-like; K00432 glutathione peroxidase [EC:1.11.1.9] (A)	ko00480:Glutathione metabolism;ko00590:Arachidonic acid metabolism	Probable glutathione peroxidase 8-B GN=gpx8-b OS=Xenopus laevis (African clawed frog) PE=2 SV=1	O	Posttranslational modification, protein turnover, chaperones	PREDICTED: LOW QUALITY PROTEIN: glutathione peroxidase 3-like [Oreochromis niloticus]
LOC100702243	4565	9501	845.065	1584.92	0.000227332	1.00785	up	[Z]	Cytoskeleton	Molecular Function: GTPase activity (GO:0003924);; Molecular Function: structural constituent of cytoskeleton (GO:0005200);; Molecular Function: GTP binding (GO:0005525);; Cellular Component: cytoplasm (GO:0005737);; Cellular Component: microtubule (GO:0005874);; Biological Process: GTP catabolic process (GO:0006184);; Biological Process: microtubule-based process (GO:0007017);; Biological Proces…	K07374|2.8076e-87|amj:102560922|TUBA1C; tubulin, alpha 1c; K07374 tubulin alpha (A)	ko04145:Phagosome;ko04540:Gap junction	Tubulin alpha chain GN=tuba OS=Xenopus laevis (African clawed frog) PE=2 SV=2	Z	Cytoskeleton	PREDICTED: tubulin alpha chain-like [Oreochromis niloticus]
LOC102083150	1	217	0.0322821	5.78606	0	6.31379	up	--	--	--	--	--	--	--	--	PREDICTED: uncharacterized protein LOC102083150 [Oreochromis niloticus]
LOC100690838	203	91	1.57939	0.742236	0.00081195	-1.1917	down	--	--	--	K09171|0|mze:101467845|nuclear factor 1 X-type-like; K09171 nuclear factor I/X (A)	--	Nuclear factor 1 X-type GN=NFIX OS=Gallus gallus (Chicken) PE=2 SV=1	K	Transcription	PREDICTED: nuclear factor 1 X-type-like isoform X1 [Stegastes partitus]
ctgf	294	141	5.99313	2.84305	0.000781579	-1.10015	down	--	--	Biological Process: regulation of cell growth (GO:0001558);; Molecular Function: insulin-like growth factor binding (GO:0005520);; Cellular Component: extracellular region (GO:0005576);; Biological Process: notochord development (GO:0030903);;	K06827|0|mze:101466391|connective tissue growth factor-like; K06827 connective tissue growth factor (A)	--	Protein NOV homolog (Precursor) GN=nov OS=Xenopus laevis (African clawed frog) PE=2 SV=1	W	Extracellular structures	PREDICTED: connective tissue growth factor-like [Oreochromis niloticus]
LOC100705719	7	45	0.193012	1.30467	0.000695586	2.38259	up	--	--	Molecular Function: N-formyl peptide receptor activity (GO:0004982);; Molecular Function: olfactory receptor activity (GO:0004984);; Cellular Component: plasma membrane (GO:0005886);; Biological Process: G-protein coupled receptor signaling pathway (GO:0007186);; Cellular Component: integral component of membrane (GO:0016021);; Biological Process: detection of chemical stimulus involved in sensor…	K04245|0|mze:101465896|chemokine-like receptor 1-like; K04245 chemokine-like receptor 1 (A)	--	C3a anaphylatoxin chemotactic receptor GN=c3ar1 OS=Danio rerio (Zebrafish) PE=3 SV=1	T	Signal transduction mechanisms	PREDICTED: chemokine-like receptor 1-like [Oreochromis niloticus]
LOC102081671	203	28	2.18682	0.237456	0	-2.83332	down	--	--	Molecular Function: phospholipid binding (GO:0005543);; Biological Process: signal transduction (GO:0007165);;	--	--	SLIT-ROBO Rho GTPase-activating protein 2 GN=srgap2 OS=Danio rerio (Zebrafish) PE=2 SV=1	T	Signal transduction mechanisms	PREDICTED: rho GTPase-activating protein 20-like [Oreochromis niloticus]
LOC100707450	299	71	5.18966	1.23451	2.62568e-13	-2.09716	down	--	--	Cellular Component: integral component of membrane (GO:0016021);;	K06081|0|mze:101487301|poliovirus receptor-related protein 1-like; K06081 poliovirus receptor-related protein 1 (A)	ko04514:Cell adhesion molecules (CAMs);ko04520:Adherens junction;ko05168:Herpes simplex infection	Nectin-3-like protein (Precursor) GN=pvrl3l OS=Danio rerio (Zebrafish) PE=2 SV=2	T	Signal transduction mechanisms	PREDICTED: poliovirus receptor-related protein 1-like isoform X2 [Oreochromis niloticus]
LOC100700182	36	3	1.11642	0.0959391	0.000119595	-3.04707	down	--	--	--	K05092|1.51675e-153|mze:101480562|receptor-type tyrosine-protein kinase FLT3-like; K05092 fms-related tyrosine kinase 3 [EC:2.7.10.1] (A)	ko04060:Cytokine-cytokine receptor interaction	Mast/stem cell growth factor receptor Kit (Precursor) GN=KIT OS=Gallus gallus (Chicken) PE=2 SV=1	T	Signal transduction mechanisms	PREDICTED: Down syndrome cell adhesion molecule-like protein Dscam2-like [Oreochromis niloticus]
bcl11b	91	36	0.587461	0.243405	0.00862024	-1.34613	down	[R]	General function prediction only	Molecular Function: nucleic acid binding (GO:0003676);; Molecular Function: metal ion binding (GO:0046872);;	--	--	Myoneurin GN=mynn OS=Danio rerio (Zebrafish) PE=2 SV=1	K	Transcription	PREDICTED: B-cell lymphoma/leukemia 11B-like isoform X1 [Oreochromis niloticus]
LOC100694824	584	19	7.00497	0.255356	0	-4.87069	down	--	--	Molecular Function: GABA-A receptor activity (GO:0004890);; Molecular Function: extracellular ligand-gated ion channel activity (GO:0005230);; Cellular Component: plasma membrane (GO:0005886);; Biological Process: signal transduction (GO:0007165);; Cellular Component: integral component of membrane (GO:0016021);; Cellular Component: cell junction (GO:0030054);; Biological Process: ion transmembra…	K05189|0|mze:101470427|gamma-aminobutyric acid receptor subunit pi-like; K05189 gamma-aminobutyric acid receptor subunit pi (A)	ko04080:Neuroactive ligand-receptor interaction	Gamma-aminobutyric acid receptor subunit beta-3 (Precursor) GN=GABRB3 OS=Gallus gallus (Chicken) PE=2 SV=1	T	Signal transduction mechanisms	PREDICTED: gamma-aminobutyric acid receptor subunit pi-like isoform X1 [Oreochromis niloticus]
LOC100699518	54	4	1.57885	0.101755	8.36264e-08	-3.3332	down	--	--	--	--	--	Synembryn-A GN=ric8a OS=Xenopus tropicalis (Western clawed frog) PE=2 SV=1	T	Signal transduction mechanisms	PREDICTED: synembryn-A-like isoform X1 [Pundamilia nyererei]
tcf7l1	86	30	1.39197	0.447747	0.00212094	-1.51608	down	--	--	Biological Process: Wnt signaling pathway (GO:0016055);;	K04490|0|mze:101481605|transcription factor 7-like 1-A-like; K04490 transcription factor 7-like 1 (A)	ko04310:Wnt signaling pathway;ko04520:Adherens junction;ko04916:Melanogenesis	Transcription factor 7-like 1-A GN=tcf7l1a OS=Danio rerio (Zebrafish) PE=1 SV=1	K	Transcription	PREDICTED: transcription factor 7-like 1-A-like isoform X1 [Oreochromis niloticus]
cntn1	118	252	1.31845	2.85364	0.00477312	1.03495	up	--	--	--	K06759|0|mze:101480807|contactin-1a-like; K06759 contactin 1 (A)	ko04514:Cell adhesion molecules (CAMs)	Contactin-1a (Precursor) GN=cntn1a OS=Danio rerio (Zebrafish) PE=2 SV=1	T	Signal transduction mechanisms	PREDICTED: contactin-1a-like [Oreochromis niloticus]
LOC100691544	140	54	3.30725	1.31743	0.00032381	-1.39563	down	--	--	--	--	--	Glutamate receptor-interacting protein 2 OS=Xenopus laevis (African clawed frog) PE=2 SV=2	T	Signal transduction mechanisms	PREDICTED: glutamate receptor-interacting protein 2-like [Oreochromis niloticus]
dner	157	368	2.57516	6.00819	0.000111032	1.17115	up	--	--	Molecular Function: calcium ion binding (GO:0005509);; Biological Process: glial cell differentiation (GO:0010001);; Biological Process: negative regulation of glial cell proliferation (GO:0060253);; Biological Process: negative regulation of neural precursor cell proliferation (GO:2000178);;	--	--	Notch 1 intracellular domain (Precursor) GN=notch1a OS=Danio rerio (Zebrafish) PE=2 SV=1	T	Signal transduction mechanisms	PREDICTED: delta/notch-like EGF repeat containing [Oreochromis niloticus]
LOC100705283	8	42	0.194839	1.01349	0.00597101	2.12912	up	--	--	--	K08452|0|mze:101463969|G-protein coupled receptor 56-like; K08452 G protein-coupled receptor 97 (A)	--	G-protein coupled receptor 126 (Precursor) GN=gpr126 OS=Danio rerio (Zebrafish) PE=2 SV=1	T	Signal transduction mechanisms	PREDICTED: G-protein coupled receptor 56-like [Oreochromis niloticus]
LOC100694188	120	268	2.35255	4.86622	0.00136849	1.09926	up	--	--	Biological Process: G1/S transition of mitotic cell cycle (GO:0000082);; Biological Process: endothelial cell development (GO:0001885);; Biological Process: heart looping (GO:0001947);; Molecular Function: sequence-specific DNA binding transcription factor activity (GO:0003700);; Cellular Component: nucleus (GO:0005634);; Cellular Component: cytosol (GO:0005829);; Biological Process: regulation o…	K15613|0|tru:101073206|homeobox protein Meis1-like; K15613 homeobox protein Meis1 (A)	--	Homeobox protein Meis1 GN=meis1 OS=Xenopus laevis (African clawed frog) PE=1 SV=1	K	Transcription	PREDICTED: homeobox protein Meis1-like [Oreochromis niloticus]
LOC100704899	214	108	6.21183	3.19182	0.00827475	-1.02434	down	--	--	Molecular Function: regulatory region DNA binding (GO:0000975);; Molecular Function: sequence-specific DNA binding transcription factor activity (GO:0003700);; Biological Process: regulation of transcription, DNA-templated (GO:0006355);;	K09444|0|mze:101465785|interferon regulatory factor 1-like; K09444 interferon regulatory factor 1 (A)	--	Interferon regulatory factor 1 GN=IRF1 OS=Gallus gallus (Chicken) PE=2 SV=1	K	Transcription	PREDICTED: interferon regulatory factor 1-like [Oreochromis niloticus]
LOC100696794	120	38	1.27083	0.388674	2.60511e-05	-1.66443	down	--	--	Molecular Function: calcium ion binding (GO:0005509);; Biological Process: cell-cell junction assembly (GO:0007043);; Biological Process: heart development (GO:0007507);; Cellular Component: membrane (GO:0016020);;	--	--	Protein HEG (Precursor) GN=heg OS=Danio rerio (Zebrafish) PE=1 SV=1	T	Signal transduction mechanisms	PREDICTED: protein HEG-like isoform X2 [Oreochromis niloticus]
dse	494	246	4.91429	2.51723	0.000409448	-1.05002	down	--	--	--	K01794|0|mze:101475897|dermatan-sulfate epimerase-like; K01794 chondroitin-glucuronate 5-epimerase [EC:5.1.3.19] (A)	ko00532:Glycosaminoglycan biosynthesis - chondroitin sulfate / dermatan sulfate	--	G	Carbohydrate transport and metabolism	PREDICTED: dermatan-sulfate epimerase isoform X2 [Oreochromis niloticus]
LOC100709281	330	10	12.1643	0.411546	0	-4.87267	down	[S]	Function unknown	--	--	--	Gamma-glutamylaminecyclotransferase B GN=ggact.2 OS=Danio rerio (Zebrafish) PE=2 SV=1	S	Function unknown	PREDICTED: gamma-glutamylaminecyclotransferase B-like isoform X1 [Oreochromis niloticus]
LOC100702615	310	89	6.90652	2.2862	1.09537e-10	-1.82991	down	--	--	Molecular Function: nucleic acid binding (GO:0003676);; Molecular Function: hydrolase activity, acting on acid anhydrides (GO:0016817);;	K12649|1.04783e-117|mze:101468974|uncharacterized LOC101468974; K12649 ATP-dependent RNA helicase DHX58 [EC:3.6.3.14] (A)	ko04622:RIG-I-like receptor signaling pathway	--	A	RNA processing and modification	PREDICTED: probable ATP-dependent RNA helicase DHX58-like [Oreochromis niloticus]
LOC100690064	225	571	7.08183	21.3899	1.63716e-06	1.28795	up	--	--	Molecular Function: sequence-specific DNA binding transcription factor activity (GO:0003700);; Molecular Function: steroid hormone receptor activity (GO:0003707);; Molecular Function: steroid binding (GO:0005496);; Cellular Component: nucleus (GO:0005634);; Biological Process: regulation of transcription, DNA-templated (GO:0006355);; Molecular Function: zinc ion binding (GO:0008270);; Biological …	K08553|0|mze:101467647|estrogen-related receptor gamma-like; K08553 estrogen-related receptor beta (A)	--	Estrogen receptor GN=ESR1 OS=Taeniopygia guttata (Zebra finch) PE=2 SV=1	T	Signal transduction mechanisms	PREDICTED: estrogen-related receptor gamma-like isoform X1 [Oreochromis niloticus]
LOC100707881	993	493	23.1259	11.1489	9.18211e-05	-1.05696	down	--	--	Molecular Function: sequence-specific DNA binding transcription factor activity (GO:0003700);; Cellular Component: nucleus (GO:0005634);; Biological Process: regulation of transcription, DNA-templated (GO:0006355);; Biological Process: fin regeneration (GO:0031101);; Molecular Function: sequence-specific DNA binding (GO:0043565);;	K09028|0|mze:101482945|transcription factor jun-B-like; K09028 transcription factor jun-B (A)	--	Transcription factor jun-B GN=junb OS=Cyprinus carpio (Common carp) PE=2 SV=1	K	Transcription	PREDICTED: transcription factor jun-B-like [Oreochromis niloticus]
LOC106099028	522	266	8.66343	4.89336	0.000696776	-1.01728	down	[R]	General function prediction only	--	--	--	Oocyte zinc finger protein XlCOF6 (Fragment) OS=Xenopus laevis (African clawed frog) PE=3 SV=1	K	Transcription	PREDICTED: zinc finger protein 99-like [Neolamprologus brichardi]
LOC100711851	10	53	0.201364	1.15149	0.000539777	2.18138	up	[TZDR]	--	--	--	--	Neuronal calcium sensor 1 GN=ncs1 OS=Xenopus laevis (African clawed frog) PE=2 SV=2	P	Inorganic ion transport and metabolism	PREDICTED: Kv channel-interacting protein 4-like isoform X2 [Oreochromis niloticus]
LOC100701523	87	12	3.82681	0.527106	3.0921e-09	-2.74188	down	--	--	Molecular Function: serine-type endopeptidase inhibitor activity (GO:0004867);;	K13963|1.26369e-150|mze:101478865|leukocyte elastase inhibitor-like; K13963 serpin B (A)	--	Leukocyte elastase inhibitor GN=serpinb1 OS=Xenopus tropicalis (Western clawed frog) PE=2 SV=1	O	Posttranslational modification, protein turnover, chaperones	PREDICTED: leukocyte elastase inhibitor-like, partial [Oreochromis niloticus]
LOC100698791	236	121	2.29894	1.21261	0.00815911	-1.00293	down	--	--	--	K02296|0|mze:101476868|aryl hydrocarbon receptor nuclear translocator-like protein 2-like; K02296 aryl hydrocarbon receptor nuclear translocator-like protein 1 (A)	ko05168:Herpes simplex infection	Aryl hydrocarbon receptor nuclear translocator-like protein 2 GN=ARNTL2 OS=Gallus gallus (Chicken) PE=1 SV=1	K	Transcription	PREDICTED: LOW QUALITY PROTEIN: aryl hydrocarbon receptor nuclear translocator-like protein 2-like [Oreochromis niloticus]
LOC100693577	144	516	4.37015	16.0281	6.76315e-12	1.78023	up	[R]	General function prediction only	Biological Process: acyl-CoA metabolic process (GO:0006637);; Molecular Function: thiolester hydrolase activity (GO:0016790);;	K01068|0|mze:101478905|acyl-coenzyme A thioesterase 4-like; K01068 acyl-coenzyme A thioesterase 1/2/4 [EC:3.1.2.2] (A)	ko00062:Fatty acid elongation;ko01040:Biosynthesis of unsaturated fatty acids	--	R	General function prediction only	PREDICTED: bile acid-CoA:amino acid N-acyltransferase-like isoform X1 [Oreochromis niloticus]
LOC100704529	104	18	1.62632	0.217232	3.57672e-09	-2.47141	down	[R]	General function prediction only	Molecular Function: neurotransmitter:sodium symporter activity (GO:0005328);; Molecular Function: taurine:sodium symporter activity (GO:0005369);; Cellular Component: integral component of plasma membrane (GO:0005887);; Biological Process: neurotransmitter transport (GO:0006836);;	K05039|0|mze:101486200|sodium- and chloride-dependent taurine transporter-like; K05039 solute carrier family 6 (neurotransmitter transporter, GABA) member 6/8/11/12/13 (A)	--	Creatine transporter OS=Torpedo marmorata (Marbled electric ray) PE=2 SV=1	P	Inorganic ion transport and metabolism	PREDICTED: sodium- and chloride-dependent taurine transporter-like isoform X2 [Oreochromis niloticus]
LOC100706505	152	403	5.43011	15.446	1.85737e-06	1.34784	up	[R]	General function prediction only	--	K10324|0|xma:102218199|ankyrin repeat and SOCS box protein 2-like; K10324 ankyrin repeat and SOCS box protein 2 (A)	--	Serine/threonine-protein phosphatase 6 regulatory ankyrin repeat subunit B GN=ANKRD44 OS=Gallus gallus (Chicken) PE=2 SV=1	R	General function prediction only	PREDICTED: ankyrin repeat and SOCS box protein 2-like isoform X1 [Oreochromis niloticus]
zbtb25	80	27	0.803656	0.261129	0.0023255	-1.55715	down	--	--	Molecular Function: nucleic acid binding (GO:0003676);; Cellular Component: nucleus (GO:0005634);; Molecular Function: metal ion binding (GO:0046872);;	K10504|0|mze:101487352|zinc finger and BTB domain-containing protein 25-like; K10504 zinc finger and BTB domain-containing protein 25 (A)	--	Myoneurin GN=mynn OS=Xenopus laevis (African clawed frog) PE=2 SV=1	R	General function prediction only	PREDICTED: zinc finger and BTB domain-containing protein 25-like isoform X1 [Oreochromis niloticus]
LOC100696895	124	13	4.05131	0.384642	2.29816e-14	-3.14353	down	--	--	--	--	--	--	108	Function unknown	PREDICTED: coiled-coil domain-containing protein 30-like isoform X2 [Oreochromis niloticus]
LOC100706879	164	65	1.15321	0.460507	0.000191502	-1.36148	down	--	--	--	--	--	Uncharacterized protein KIAA1522 homolog GN=si:ch211-194e15.5 OS=Danio rerio (Zebrafish) PE=4 SV=1	S	Function unknown	PREDICTED: uncharacterized protein KIAA1522 homolog isoform X3 [Oreochromis niloticus]
lhfpl2	77	175	1.96283	4.131	0.00583682	1.11842	up	--	--	Cellular Component: integral component of membrane (GO:0016021);;	--	--	Lipoma HMGIC fusion partner-like 2 protein GN=lhfpl2 OS=Danio rerio (Zebrafish) PE=2 SV=1	S	Function unknown	PREDICTED: lipoma HMGIC fusion partner-like 2 protein-like [Oreochromis niloticus]
Tilapia_newGene_5942	30	3	3.86955	0.407035	0.00253718	-2.79667	down	--	--	--	--	--	--	S	Function unknown	PREDICTED: papilin-like [Neolamprologus brichardi]
LOC102080605	1	33	0.0632433	1.5025	5.21376e-05	3.65836	up	--	--	--	--	--	--	--	--	PREDICTED: calphotin-like, partial [Oreochromis niloticus]
LOC102079507	1656	854	29.2249	16.8459	0.000208179	-1.0033	down	--	--	--	--	--	--	R	General function prediction only	PREDICTED: myelin-oligodendrocyte glycoprotein-like isoform X1 [Oreochromis niloticus]
LOC100701712	594	68	5.20561	0.584776	0	-3.14431	down	[BQ]	--	--	K11408|0|mze:101467054|histone deacetylase 7-like; K11408 histone deacetylase 7 [EC:3.5.1.98] (A)	--	Histone deacetylase 4 GN=HDAC4 OS=Gallus gallus (Chicken) PE=2 SV=1	B	Chromatin structure and dynamics	PREDICTED: histone deacetylase 7-like isoform X1 [Oreochromis niloticus]
bahcc1	91	251	0.324529	0.845458	9.6861e-06	1.39818	up	--	--	--	--	--	--	K	Transcription	PREDICTED: BAH and coiled-coil domain-containing protein 1-like [Neolamprologus brichardi]
slc13a3	55	13	0.684588	0.176613	0.000992055	-1.99436	down	[P]	Inorganic ion transport and metabolism	Molecular Function: transporter activity (GO:0005215);; Biological Process: sodium ion transport (GO:0006814);; Cellular Component: membrane (GO:0016020);; Biological Process: transmembrane transport (GO:0055085);;	K14445|0|mze:101482327|solute carrier family 13 member 3-like; K14445 solute carrier family 13 (sodium-dependent dicarboxylate transporter), member 2/3/5 (A)	--	--	P	Inorganic ion transport and metabolism	PREDICTED: solute carrier family 13 member 3 isoform X1 [Oreochromis niloticus]
LOC100698337	324	109	3.8011	1.31083	1.42508e-08	-1.60586	down	--	--	--	--	--	Protein FAM110B GN=fam110b OS=Danio rerio (Zebrafish) PE=2 SV=1	S	Function unknown	PREDICTED: protein FAM110B-like [Oreochromis niloticus]
LOC100700462	124	53	5.18837	2.20994	0.00456081	-1.24885	down	--	--	Cellular Component: nucleus (GO:0005634);; Biological Process: response to stress (GO:0006950);; Biological Process: regulation of cell cycle (GO:0051726);;	K04402|8.82892e-112|mze:101470608|growth arrest and DNA damage-inducible protein GADD45 alpha-like; K04402 growth arrest and DNA-damage-inducible protein (A)	ko04010:MAPK signaling pathway;ko04068:FoxO signaling pathway;ko04110:Cell cycle;ko04115:p53 signaling pathway	40S ribosomal protein S12 OS=Gallus gallus (Chicken) PE=1 SV=2	D	Cell cycle control, cell division, chromosome partitioning	PREDICTED: growth arrest and DNA damage-inducible protein GADD45 alpha-like isoform X1 [Oreochromis niloticus]
LOC100711575	306	141	4.90269	2.28375	0.000237215	-1.15755	down	--	--	Molecular Function: calcium ion binding (GO:0005509);; Cellular Component: integral component of membrane (GO:0016021);;	K12473|0|tru:101072134|low-density lipoprotein receptor 1-like; K12473 low-density lipoprotein receptor (A)	ko04144:Endocytosis	Low-density lipoprotein receptor 1 (Precursor) GN=ldlr-a OS=Xenopus laevis (African clawed frog) PE=2 SV=1	T	Signal transduction mechanisms	PREDICTED: low-density lipoprotein receptor 1-like [Oreochromis niloticus]
LOC100702004	121	36	1.92879	0.5608	7.42498e-06	-1.75079	down	--	--	--	K05763|0|mze:101465591|moesin-like; K05763 moesin (A)	ko04810:Regulation of actin cytoskeleton	Radixin GN=RDX OS=Gallus gallus (Chicken) PE=2 SV=1	R	General function prediction only	PREDICTED: moesin-like isoform X2 [Oreochromis niloticus]
abhd3	162	10	1.88443	0.125085	0	-3.85365	down	[R]	General function prediction only	Molecular Function: carboxylic ester hydrolase activity (GO:0004091);;	K13696|0|mze:101480151|abhydrolase domain-containing protein 3-like; K13696 abhydrolase domain-containing protein 1/3 (A)	--	Abhydrolase domain-containing protein 2-A GN=abhd2a OS=Danio rerio (Zebrafish) PE=2 SV=1	R	General function prediction only	PREDICTED: abhydrolase domain-containing protein 3-like isoform X1 [Oreochromis niloticus]
LOC100692082	49	150	1.08658	3.78807	3.93256e-05	1.53317	up	--	--	Biological Process: glutamine metabolic process (GO:0006541);; Molecular Function: omega peptidase activity (GO:0008242);;	K01307|0|mze:101486490|gamma-glutamyl hydrolase-like; K01307 gamma-glutamyl hydrolase [EC:3.4.19.9] (A)	ko00790:Folate biosynthesis	--	H	Coenzyme transport and metabolism	PREDICTED: gamma-glutamyl hydrolase-like isoform X1 [Oreochromis niloticus]
LOC100692514	1296	0	17.3583	0	0	-9.61319	down	--	--	Molecular Function: peroxidase activity (GO:0004601);; Molecular Function: calcium ion binding (GO:0005509);; Biological Process: response to oxidative stress (GO:0006979);; Molecular Function: heme binding (GO:0020037);; Biological Process: oxidation-reduction process (GO:0055114);;	K00431|0|mze:101472649|thyroid peroxidase-like; K00431 thyroid peroxidase [EC:1.11.1.8] (A)	ko00350:Tyrosine metabolism	Peroxidasin (Precursor) GN=pxdn OS=Xenopus tropicalis (Western clawed frog) PE=2 SV=1	R	General function prediction only	PREDICTED: thyroid peroxidase-like [Oreochromis niloticus]
LOC102078701	165	31	7.6167	1.39466	5.00178e-12	-2.39823	down	--	--	--	K10408|7.54903e-133|lcm:102350316|dynein heavy chain 8, axonemal-like; K10408 dynein heavy chain, axonemal (A)	--	--	Z	Cytoskeleton	PREDICTED: dynein heavy chain 5, axonemal-like isoform X1 [Oreochromis niloticus]
slc7a7	65	6	1.26077	0.117363	1.15447e-08	-3.16045	down	[E]	Amino acid transport and metabolism	Biological Process: amino acid transmembrane transport (GO:0003333);; Molecular Function: amino acid transmembrane transporter activity (GO:0015171);; Cellular Component: integral component of membrane (GO:0016021);;	K13867|0|mze:101473360|Y+L amino acid transporter 1-like; K13867 solute carrier family 7 (L-type amino acid transporter), member 7 (A)	--	Y+L amino acid transporter 2 OS=Danio rerio (Zebrafish) PE=2 SV=1	E	Amino acid transport and metabolism	PREDICTED: Y+L amino acid transporter 1-like isoform X1 [Oreochromis niloticus]
LOC106097676	8	53	0.413936	2.59395	7.87463e-05	2.45293	up	[R]	General function prediction only	--	--	--	O-acetyl-ADP-ribose deacetylase MACROD2 GN=macrod2 OS=Xenopus laevis (African clawed frog) PE=2 SV=1	R	General function prediction only	PREDICTED: uncharacterized protein LOC102794022 [Neolamprologus brichardi]
gpr161	265	638	4.59491	10.7292	6.76507e-06	1.21309	up	--	--	Molecular Function: G-protein coupled receptor activity (GO:0004930);; Biological Process: G-protein coupled receptor signaling pathway (GO:0007186);; Cellular Component: integral component of membrane (GO:0016021);;	K08439|0|mze:101472335|G-protein coupled receptor 161-like; K08439 G protein-coupled receptor 161 (A)	--	G-protein coupled receptor 161 GN=gpr161 OS=Danio rerio (Zebrafish) PE=2 SV=2	T	Signal transduction mechanisms	PREDICTED: G-protein coupled receptor 161-like isoform X1 [Maylandia zebra]
opn3	140	44	3.79524	0.945546	5.14076e-06	-1.68103	down	--	--	Molecular Function: G-protein coupled receptor activity (GO:0004930);; Biological Process: G-protein coupled receptor signaling pathway (GO:0007186);; Biological Process: visual perception (GO:0007601);; Molecular Function: photoreceptor activity (GO:0009881);; Cellular Component: integral component of membrane (GO:0016021);; Biological Process: protein-chromophore linkage (GO:0018298);;	K04256|0|mze:101464711|opsin-3-like; K04256 c-opsin (A)	--	Pinopsin OS=Columba livia (Domestic pigeon) PE=1 SV=1	R	General function prediction only	PREDICTED: opsin-3-like [Oreochromis niloticus]
LOC100689908	853	269	14.2844	4.72468	1.13953e-12	-1.70793	down	--	--	Molecular Function: lipoprotein lipase activity (GO:0004465);; Cellular Component: extracellular region (GO:0005576);; Biological Process: lipid metabolic process (GO:0006629);;	K01059|0|mze:101478316|lipoprotein lipase-like; K01059 lipoprotein lipase [EC:3.1.1.34] (A)	ko00561:Glycerolipid metabolism;ko03320:PPAR signaling pathway	Lipoprotein lipase (Precursor) GN=LPL OS=Gallus gallus (Chicken) PE=1 SV=1	I	Lipid transport and metabolism	PREDICTED: lipoprotein lipase-like [Oreochromis niloticus]
LOC100707699	170	67	2.81246	1.00428	0.00013341	-1.3702	down	--	--	Molecular Function: steroid hormone receptor activity (GO:0003707);; Molecular Function: retinoic acid receptor activity (GO:0003708);; Cellular Component: nucleus (GO:0005634);; Biological Process: regulation of transcription, DNA-templated (GO:0006355);; Molecular Function: zinc ion binding (GO:0008270);; Biological Process: steroid hormone mediated signaling pathway (GO:0043401);; Molecular Fu…	K03728|0|mze:101468050|nuclear receptor subfamily 1 group D member 1-like; K03728 nuclear receptor subfamily 1 group D member 1 (A)	--	Peroxisome proliferator-activated receptor gamma GN=pparg OS=Xenopus laevis (African clawed frog) PE=1 SV=1	K	Transcription	PREDICTED: nuclear receptor subfamily 1 group D member 1-like [Oreochromis niloticus]
LOC106099045	2	44	0.0323955	0.611883	1.2474e-06	3.5946	up	[L]	Replication, recombination and repair	--	--	--	Retinoic acid receptor gamma-A GN=rarga OS=Danio rerio (Zebrafish) PE=1 SV=2	R	General function prediction only	PREDICTED: uncharacterized protein LOC101156905 [Oryzias latipes]
gsr	583	163	11.2231	3.17614	7.31637e-14	-1.87698	down	[C]	Energy production and conversion	Molecular Function: glutathione-disulfide reductase activity (GO:0004362);; Biological Process: glutathione metabolic process (GO:0006749);; Biological Process: cell redox homeostasis (GO:0045454);; Molecular Function: flavin adenine dinucleotide binding (GO:0050660);; Molecular Function: NADP binding (GO:0050661);; Biological Process: oxidation-reduction process (GO:0055114);;	K00383|0|mze:101474090|glutathione reductase, mitochondrial-like; K00383 glutathione reductase (NADPH) [EC:1.8.1.7] (A)	ko00480:Glutathione metabolism	--	Q	Secondary metabolites biosynthesis, transport and catabolism	PREDICTED: glutathione reductase, mitochondrial-like isoform X1 [Maylandia zebra]
slc37a2	33	295	0.554832	5.2351	0	3.0485	up	[G]	Carbohydrate transport and metabolism	Molecular Function: transporter activity (GO:0005215);; Biological Process: carbohydrate transport (GO:0008643);; Cellular Component: integral component of membrane (GO:0016021);; Biological Process: transmembrane transport (GO:0055085);;	K13783|0|mze:101483403|sugar phosphate exchanger 2-like; K13783 MFS transporter, OPA family, solute carrier family 37 (glycerol-3-phosphate transporter), member 1/2 (A)	--	Sugar phosphate exchanger 2 GN=slc37a2 OS=Danio rerio (Zebrafish) PE=2 SV=1	P	Inorganic ion transport and metabolism	PREDICTED: sugar phosphate exchanger 2-like [Oreochromis niloticus]
LOC100704273	131	24	1.74064	0.322595	1.7986e-10	-2.4164	down	--	--	Molecular Function: DNA binding (GO:0003677);; Cellular Component: nucleus (GO:0005634);; Biological Process: regulation of transcription, DNA-templated (GO:0006355);; Biological Process: multicellular organismal development (GO:0007275);; Molecular Function: metal ion binding (GO:0046872);; Molecular Function: protein dimerization activity (GO:0046983);;	K09103|0|mze:101476299|transcription factor COE2-like; K09103 early B-cell factor (A)	--	Transcription factor COE2 GN=coe2 OS=Danio rerio (Zebrafish) PE=2 SV=1	K	Transcription	PREDICTED: transcription factor COE2-like isoform X4 [Oreochromis niloticus]
LOC102076959	158	4	2.01375	0.0867774	0	-4.85354	down	--	--	--	--	--	--	--	--	PREDICTED: stereocilin-like isoform X2 [Poecilia reticulata]
LOC102080683	51	330	1.86371	11.827	0	2.60589	up	--	--	--	--	--	--	T	Signal transduction mechanisms	PREDICTED: hepatitis A virus cellular receptor 1-like [Oreochromis niloticus]
LOC102075650	162	53	3.09294	1.01599	3.0737e-06	-1.63003	down	--	--	--	--	--	--	414	Function unknown	PREDICTED: myb/SANT-like DNA-binding domain-containing protein 4-like [Oreochromis niloticus]
LOC102076121	8	48	0.393847	3.8392	0.000567592	2.31468	up	--	--	--	--	--	--	R	General function prediction only	PREDICTED: uncharacterized protein LOC102076121 [Oreochromis niloticus]
trpc6	181	79	2.49519	1.18375	0.000826034	-1.22759	down	--	--	Molecular Function: calcium channel activity (GO:0005262);; Cellular Component: integral component of membrane (GO:0016021);; Biological Process: calcium ion transmembrane transport (GO:0070588);;	K04969|0|mze:101486047|short transient receptor potential channel 6-like; K04969 transient receptor potential cation channel subfamily C member 6 (A)	--	--	P	Inorganic ion transport and metabolism	PREDICTED: short transient receptor potential channel 6-like isoform X1 [Pundamilia nyererei]
bcl2	154	62	2.07857	0.875175	0.000400628	-1.33803	down	--	--	Biological Process: negative regulation of apoptotic process (GO:0043066);;	K02161|1.3758e-169|mze:101466853|apoptosis regulator Bcl-2-like; K02161 apoptosis regulator BCL-2 (A)	ko04141:Protein processing in endoplasmic reticulum;ko04210:Apoptosis;ko04261:Adrenergic signaling in cardiomyocytes;ko04510:Focal adhesion	Apoptosis regulator Bcl-2 GN=BCL2 OS=Gallus gallus (Chicken) PE=2 SV=1	T	Signal transduction mechanisms	PREDICTED: apoptosis regulator Bcl-2-like [Oreochromis niloticus]
LOC100697259	302	120	1.98722	0.790278	4.07752e-06	-1.3683	down	[R]	General function prediction only	Molecular Function: Rab GTPase activator activity (GO:0005097);; Biological Process: positive regulation of Rab GTPase activity (GO:0032851);;	--	--	Rab GTPase-activating protein 1-like OS=Gallus gallus (Chicken) PE=2 SV=1	R	General function prediction only	PREDICTED: EVI5-like protein-like isoform X1 [Oreochromis niloticus]
LOC100691858	1353	3426	21.5162	57.6709	5.55852e-08	1.28996	up	--	--	--	--	--	--	S	Function unknown	PREDICTED: anoctamin-9-like isoform X1 [Oreochromis niloticus]
LOC100689862	76	255	3.42973	11.5361	3.81788e-08	1.67562	up	--	--	Cellular Component: nucleosome (GO:0000786);; Molecular Function: DNA binding (GO:0003677);; Cellular Component: nucleus (GO:0005634);; Biological Process: nucleosome assembly (GO:0006334);; Molecular Function: protein heterodimerization activity (GO:0046982);;	K11252|2.21939e-59|dan:Dana_GF18984|GF18984 gene product from transcript GF18984-RA; K11252 histone H2B (A)	--	Histone H2B OS=Rhacophorus schlegelii (Japanese gliding frog) PE=1 SV=3	B	Chromatin structure and dynamics	PREDICTED: histone H2B.3-like [Oryzias latipes]
sycp3	213	88	8.33255	4.05937	9.38357e-05	-1.30797	down	--	--	--	--	--	--	S	Function unknown	PREDICTED: synaptonemal complex protein 3-like isoform X1 [Oreochromis niloticus]
Tilapia_newGene_575	65	255	12.3727	49.6701	3.89855e-10	1.89598	up	--	--	--	--	--	Ig mu chain C region membrane-bound form OS=Ictalurus punctatus (Channel catfish) PE=4 SV=1	R	General function prediction only	immunoglobulin heavy chain [Oreochromis niloticus]
LOC100700402	76	283	1.46126	5.36551	5.88652e-10	1.82497	up	--	--	Molecular Function: zinc ion binding (GO:0008270);;	K15699|4.07517e-101|mze:101471119|RING finger protein 122-like; K15699 RING finger protein 122 (A)	--	E3 ubiquitin-protein ligase RNF12 OS=Xenopus tropicalis (Western clawed frog) PE=2 SV=1	O	Posttranslational modification, protein turnover, chaperones	PREDICTED: RING finger protein 122-like [Oreochromis niloticus]
LOC100694775	285	627	5.02089	10.4463	0.000134264	1.08372	up	--	--	Molecular Function: binding (GO:0005488);; Biological Process: regulation of transcription, DNA-templated (GO:0006355);; Biological Process: negative regulation of macromolecule metabolic process (GO:0010605);; Biological Process: cell differentiation (GO:0030154);; Biological Process: regulation of histone methylation (GO:0031060);; Biological Process: negative regulation of cellular metabolic p…	--	--	Protein Jumonji GN=jarid2b OS=Danio rerio (Zebrafish) PE=3 SV=2	231	General function prediction only	PREDICTED: uncharacterized protein LOC100694775 isoform X1 [Oreochromis niloticus]
socs1	51	126	1.39665	3.4529	0.00681272	1.22887	up	--	--	Biological Process: protein ubiquitination (GO:0016567);; Biological Process: intracellular signal transduction (GO:0035556);;	K04694|5.7273e-138|mze:101465207|suppressor of cytokine signaling 1-like; K04694 suppressor of cytokine signaling 1 (A)	ko04120:Ubiquitin mediated proteolysis;ko04630:Jak-STAT signaling pathway;ko04910:Insulin signaling pathway	Cytokine-inducible SH2-containing protein GN=CISH OS=Gallus gallus (Chicken) PE=2 SV=1	T	Signal transduction mechanisms	PREDICTED: suppressor of cytokine signaling 1-like [Oreochromis niloticus]
LOC100697674	133	56	3.74548	1.70042	0.00233832	-1.27164	down	--	--	--	--	--	Putative ferric-chelate reductase 1 GN=frrs1 OS=Danio rerio (Zebrafish) PE=2 SV=1	T	Signal transduction mechanisms	PREDICTED: putative ferric-chelate reductase 1-like [Oreochromis niloticus]
slc23a1	23	92	0.521	2.0381	3.66401e-05	1.87693	up	--	--	Molecular Function: transporter activity (GO:0005215);; Cellular Component: membrane (GO:0016020);; Biological Process: transmembrane transport (GO:0055085);;	K14611|0|tru:101072183|solute carrier family 23 member 1-like; K14611 solute carrier family 23 (nucleobase transporter), member 1/2 (A)	--	Solute carrier family 23 member 2 {ECO:0000250|UniProtKB:Q9UGH3} GN=slc23a2 OS=Xenopus tropicalis (Western clawed frog) PE=2 SV=1	P	Inorganic ion transport and metabolism	PREDICTED: solute carrier family 23 member 1-like [Oreochromis niloticus]
LOC102080922	194	0	8.15649	0	0	-6.88368	down	[K]	Transcription	--	--	--	ALX homeobox protein 1 GN=alx1 OS=Xenopus laevis (African clawed frog) PE=2 SV=1	R	General function prediction only	PREDICTED: retinal homeobox protein Rx-B-like [Oreochromis niloticus]
LOC100700520	69	10	1.26133	0.202167	3.15431e-07	-2.64188	down	--	--	--	--	--	--	S	Function unknown	PREDICTED: transmembrane protein C15orf27-like [Oreochromis niloticus]
LOC100693073	473	51	7.54155	0.795054	0	-3.21997	down	--	--	Cellular Component: intracellular (GO:0005622);; Biological Process: signal transduction (GO:0007165);;	--	--	Rho GTPase-activating protein 21 GN=arhgap21 OS=Xenopus tropicalis (Western clawed frog) PE=2 SV=1	T	Signal transduction mechanisms	PREDICTED: rho GTPase-activating protein 20-like [Oreochromis niloticus]
fndc3b	324	131	2.01253	0.824237	4.52712e-06	-1.34438	down	--	--	--	--	--	Fibronectin type-III domain-containing protein 3a GN=FNDC3A OS=Gallus gallus (Chicken) PE=2 SV=2	S	Function unknown	PREDICTED: fibronectin type III domain-containing protein 3B isoform X1 [Oreochromis niloticus]
LOC100711482	1226	434	19.6014	7.41296	5.39285e-11	-1.54381	down	[O]	Posttranslational modification, protein turnover, chaperones	Molecular Function: peptidyl-prolyl cis-trans isomerase activity (GO:0003755);; Molecular Function: FK506 binding (GO:0005528);; Biological Process: protein folding (GO:0006457);; Cellular Component: membrane (GO:0016020);; Biological Process: peptidyl-proline modification (GO:0018208);;	K09571|0|mze:101485431|peptidyl-prolyl cis-trans isomerase FKBP5-like; K09571 FK506-binding protein 4/5 [EC:5.2.1.8] (A)	--	Peptidyl-prolyl cis-trans isomerase FKBP1A GN=fkbp1a OS=Xenopus laevis (African clawed frog) PE=3 SV=3	O	Posttranslational modification, protein turnover, chaperones	PREDICTED: peptidyl-prolyl cis-trans isomerase FKBP5-like [Oreochromis niloticus]
LOC100708240	209	80	2.79448	1.16193	1.63473e-05	-1.41559	down	[V]	Defense mechanisms	Molecular Function: ATP binding (GO:0005524);; Biological Process: ATP catabolic process (GO:0006200);; Cellular Component: integral component of membrane (GO:0016021);; Molecular Function: ATPase activity, coupled to transmembrane movement of substances (GO:0042626);; Biological Process: transmembrane transport (GO:0055085);;	K05666|0|mze:101468212|canalicular multispecific organic anion transporter 1-like; K05666 ATP-binding cassette, subfamily C (CFTR/MRP), member 2 (A)	ko02010:ABC transporters	Multidrug resistance-associated protein 1 GN=ABCC1 OS=Gallus gallus (Chicken) PE=2 SV=1	Q	Secondary metabolites biosynthesis, transport and catabolism	PREDICTED: canalicular multispecific organic anion transporter 1-like, partial [Oreochromis niloticus]
ada	466	234	7.29647	4.3567	0.000606026	-1.03777	down	[F]	Nucleotide transport and metabolism	Biological Process: purine ribonucleoside monophosphate biosynthetic process (GO:0009168);; Molecular Function: deaminase activity (GO:0019239);;	K01488|0|mze:101473733|adenosine deaminase-like; K01488 adenosine deaminase [EC:3.5.4.4] (A)	ko00230:Purine metabolism	Adenosine deaminase GN=ada OS=Danio rerio (Zebrafish) PE=2 SV=2	F	Nucleotide transport and metabolism	PREDICTED: adenosine deaminase-like [Oreochromis niloticus]
LOC102077161	226	111	3.34971	1.72552	0.0037853	-1.06354	down	--	--	Molecular Function: hormone activity (GO:0005179);; Cellular Component: extracellular region (GO:0005576);;	--	--	--	R	General function prediction only	PREDICTED: ADM2-like [Oreochromis niloticus]
podn	198	470	4.06373	9.5025	3.00788e-05	1.19104	up	[S]	Function unknown	Molecular Function: sterol binding (GO:0032934);;	--	--	Leucine-rich repeat-containing G-protein coupled receptor 4 (Precursor) GN=lgr4 OS=Danio rerio (Zebrafish) PE=2 SV=1	R	General function prediction only	PREDICTED: podocan [Oreochromis niloticus]
LOC100698653	197	451	9.47645	21.9823	0.000103365	1.13897	up	[R]	General function prediction only	Molecular Function: oxidoreductase activity (GO:0016491);; Biological Process: oxidation-reduction process (GO:0055114);;	--	--	Dehydrogenase/reductase SDR family member 11 (Precursor) GN=DHRS11 OS=Gallus gallus (Chicken) PE=2 SV=1	Q	Secondary metabolites biosynthesis, transport and catabolism	PREDICTED: dehydrogenase/reductase SDR family member 11-like [Oreochromis niloticus]
LOC100699865	64	4	1.27924	0.0994481	8.11925e-10	-3.57158	down	[R]	General function prediction only	Molecular Function: neurotransmitter:sodium symporter activity (GO:0005328);; Biological Process: neurotransmitter transport (GO:0006836);; Cellular Component: integral component of membrane (GO:0016021);;	K05039|0|mze:101475927|sodium- and chloride-dependent GABA transporter 2-like; K05039 solute carrier family 6 (neurotransmitter transporter, GABA) member 6/8/11/12/13 (A)	--	Creatine transporter OS=Torpedo marmorata (Marbled electric ray) PE=2 SV=1	P	Inorganic ion transport and metabolism	PREDICTED: sodium- and chloride-dependent GABA transporter 2-like [Oreochromis niloticus]
LOC100692129	41	144	0.341425	1.08209	3.39937e-06	1.72294	up	--	--	--	K02633|0|mze:101465886|period circadian protein homolog 2-like; K02633 period circadian protein (A)	ko05168:Herpes simplex infection	Period circadian protein homolog 2 GN=PER2 OS=Gallus gallus (Chicken) PE=2 SV=1	T	Signal transduction mechanisms	PREDICTED: period circadian protein homolog 2-like isoform X1 [Oreochromis niloticus]
nr5a2	116	50	1.39655	0.581484	0.0076191	-1.2353	down	--	--	Molecular Function: sequence-specific DNA binding transcription factor activity (GO:0003700);; Molecular Function: steroid hormone receptor activity (GO:0003707);; Cellular Component: nucleus (GO:0005634);; Biological Process: regulation of transcription, DNA-templated (GO:0006355);; Molecular Function: zinc ion binding (GO:0008270);; Biological Process: steroid hormone mediated signaling pathway…	K08027|0|mze:101465878|nuclear receptor subfamily 5 group A member 2-like; K08027 nuclear receptor subfamily 5 group A member 2 (A)	--	Nuclear receptor subfamily 5 group A member 2 GN=NR5A2 OS=Gallus gallus (Chicken) PE=2 SV=1	K	Transcription	PREDICTED: nuclear receptor subfamily 5 group A member 2-like isoform X1 [Oreochromis niloticus]
eya2	315	108	5.98044	2.17471	3.30206e-08	-1.57852	down	--	--	Biological Process: multicellular organismal development (GO:0007275);;	K17620|0|mze:101483071|eyes absent homolog 2-like; K17620 eyes absent homolog 2 [EC:3.1.3.48] (A)	--	Eyes absent homolog 4 (Fragment) GN=EYA4 OS=Gallus gallus (Chicken) PE=2 SV=1	K	Transcription	PREDICTED: eyes absent homolog 2-like isoform X1 [Oreochromis niloticus]
LOC100705595	654	260	6.55476	2.80676	8.15284e-08	-1.3743	down	--	--	--	K16687|0|mze:101485529|yorkie homolog; K16687 protein yorkie (A)	--	Transcriptional coactivator YAP1 GN=YAP1 OS=Gallus gallus (Chicken) PE=1 SV=1	O	Posttranslational modification, protein turnover, chaperones	PREDICTED: yorkie homolog isoform X1 [Oreochromis niloticus]
LOC100711544	108	246	2.18546	5.82226	0.00123232	1.12633	up	[TZDR]	--	Molecular Function: calcium ion binding (GO:0005509);;	--	--	Guanylyl cyclase inhibitory protein GN=GCIP OS=Lithobates pipiens (Northern leopard frog) PE=2 SV=3	T	Signal transduction mechanisms	PREDICTED: guanylyl cyclase inhibitory protein-like isoform X2 [Oreochromis niloticus]
srpx2	223	73	4.35457	1.45309	1.61707e-07	-1.63762	down	--	--	--	--	--	Sushi repeat-containing protein SRPX2 (Precursor) GN=srpx2 OS=Xenopus laevis (African clawed frog) PE=2 SV=1	R	General function prediction only	PREDICTED: sushi repeat-containing protein SRPX2-like [Oreochromis niloticus]
ino80d	1239	2666	17.3985	42.9249	5.22519e-05	1.05514	up	--	--	--	K11668|0|mze:101471886|INO80 complex subunit D-like; K11668 INO80 complex subunit D (A)	--	INO80 complex subunit D GN=ino80d OS=Xenopus laevis (African clawed frog) PE=2 SV=1	S	Function unknown	PREDICTED: INO80 complex subunit D isoform X1 [Oreochromis niloticus]
LOC100693114	578	131	13.1972	3.33835	0	-2.17623	down	--	--	Cellular Component: plasma membrane (GO:0005886);; Molecular Function: zinc ion binding (GO:0008270);; Cellular Component: integral component of membrane (GO:0016021);; Molecular Function: metal ion transmembrane transporter activity (GO:0046873);; Biological Process: zinc ion transmembrane transport (GO:0071577);;	K14709|1.824e-166|mze:101484071|zinc transporter ZIP1-like; K14709 solute carrier family 39 (zinc transporter), member 1/2/3 (A)	--	Zinc transporter ZIP1 GN=slc39a1 OS=Takifugu rubripes (Japanese pufferfish) PE=2 SV=1	P	Inorganic ion transport and metabolism	PREDICTED: zinc transporter ZIP1-like [Oreochromis niloticus]
kcnj8	666	50	11.5917	0.727361	0	-3.73982	down	--	--	Molecular Function: ATP-activated inward rectifier potassium channel activity (GO:0015272);; Cellular Component: integral component of membrane (GO:0016021);; Biological Process: regulation of ion transmembrane transport (GO:0034765);; Biological Process: potassium ion transmembrane transport (GO:0071805);;	K05001|0|mze:101483736|ATP-sensitive inward rectifier potassium channel 8-like; K05001 potassium inwardly-rectifying channel subfamily J member 8 (A)	--	G protein-activated inward rectifier potassium channel 1 GN=KCNJ3 OS=Gallus gallus (Chicken) PE=2 SV=1	P	Inorganic ion transport and metabolism	PREDICTED: ATP-sensitive inward rectifier potassium channel 8-like [Oreochromis niloticus]
strn4	162	73	1.40852	0.592325	0.00284051	-1.18057	down	[R]	General function prediction only	--	K17608|0|mze:101473481|striatin-4-like; K17608 striatin 1/3/4 (A)	--	Lissencephaly-1 homolog {ECO:0000255|HAMAP-Rule:MF_03141} GN=pafah1b1 OS=Xenopus laevis (African clawed frog) PE=2 SV=3	D	Cell cycle control, cell division, chromosome partitioning	PREDICTED: striatin-4-like [Oreochromis niloticus]
fah	94	7	2.40368	0.273631	3.12417e-13	-3.50572	down	[Q]	Secondary metabolites biosynthesis, transport and catabolism	Molecular Function: fumarylacetoacetase activity (GO:0004334);; Biological Process: aromatic amino acid family metabolic process (GO:0009072);;	K01555|0|mze:101476012|fumarylacetoacetase-like; K01555 fumarylacetoacetase [EC:3.7.1.2] (A)	ko00350:Tyrosine metabolism	--	G	Carbohydrate transport and metabolism	PREDICTED: fumarylacetoacetase-like [Oreochromis niloticus]
LOC100704714	241	60	2.12726	0.556849	2.41003e-11	-2.02459	down	--	--	--	K13858|0|mze:101481040|sodium bicarbonate cotransporter 3-like; K13858 solute carrier family 4 (sodium bicarbonate cotransporter), member 7 (A)	--	Electrogenic sodium bicarbonate cotransporter 1 GN=SLC4A4 OS=Ambystoma tigrinum (Eastern tiger salamander) PE=2 SV=1	P	Inorganic ion transport and metabolism	PREDICTED: sodium bicarbonate cotransporter 3-like isoform X2 [Oreochromis niloticus]
tbc1d4	576	283	5.21095	2.48078	0.000185836	-1.07005	down	[R]	General function prediction only	--	K17902|0|mze:101480160|TBC1 domain family member 4-like; K17902 TBC1 domain family member 4 (A)	--	Rab GTPase-activating protein 1-like OS=Gallus gallus (Chicken) PE=2 SV=1	R	General function prediction only	PREDICTED: TBC1 domain family member 4-like isoform X1 [Oreochromis niloticus]
LOC100710688	622	266	5.23877	2.33778	1.4636e-06	-1.26941	down	--	--	--	K06521|0|mze:101475744|semaphorin-4G-like; K06521 semaphorin 4 (A)	--	Semaphorin-4E (Precursor) GN=sema4e OS=Danio rerio (Zebrafish) PE=2 SV=1	T	Signal transduction mechanisms	PREDICTED: semaphorin-4G-like isoform X1 [Oreochromis niloticus]
LOC100693835	1	755	0.0255568	13.7932	0	8.10449	up	--	--	--	--	--	Protein FAM188B GN=fam188b OS=Xenopus tropicalis (Western clawed frog) PE=2 SV=1	S	Function unknown	PREDICTED: protein FAM188B2-like [Oreochromis niloticus]
scara5	116	278	1.42287	3.64022	0.000208239	1.20001	up	--	--	--	--	--	Scavenger receptor class A member 5 GN=scara5 OS=Danio rerio (Zebrafish) PE=3 SV=1	T	Signal transduction mechanisms	PREDICTED: scavenger receptor class A member 5-like [Oreochromis niloticus]
ppp1r1b	89	12	1.96236	0.27752	1.48829e-09	-2.77406	down	--	--	Molecular Function: protein phosphatase inhibitor activity (GO:0004864);; Biological Process: signal transduction (GO:0007165);;	K15494|5.06831e-86|mze:101482548|protein phosphatase 1 regulatory subunit 1B-like; K15494 protein phosphatase 1 regulatory subunit 1B (A)	--	--	T	Signal transduction mechanisms	PREDICTED: protein phosphatase 1 regulatory subunit 1B-like isoform X1 [Oreochromis niloticus]
mafb	583	149	6.9841	1.84622	1.22125e-15	-2.00513	down	--	--	Molecular Function: sequence-specific DNA binding transcription factor activity (GO:0003700);; Cellular Component: nucleus (GO:0005634);; Biological Process: regulation of transcription, DNA-templated (GO:0006355);; Biological Process: embryonic pattern specification (GO:0009880);; Biological Process: anterior/posterior pattern specification (GO:0009952);; Molecular Function: sequence-specific DN…	K09036|0|mze:101471935|transcription factor MafB-like; K09036 transcription factor MAFB (A)	--	Transcription factor MafB GN=mafb OS=Danio rerio (Zebrafish) PE=2 SV=1	K	Transcription	PREDICTED: transcription factor MafB-like [Oreochromis niloticus]
LOC100702416	248	79	2.95493	0.948946	2.77e-08	-1.6784	down	--	--	--	--	--	--	1522	Function unknown	PREDICTED: sterile alpha motif domain-containing protein 9-like isoform X1 [Oreochromis niloticus]
lrp2	422	181	1.28053	0.510247	7.43785e-06	-1.26266	down	--	--	Molecular Function: calcium ion binding (GO:0005509);; Biological Process: receptor-mediated endocytosis (GO:0006898);; Cellular Component: integral component of membrane (GO:0016021);; Biological Process: renal absorption (GO:0070293);;	K06233|0|mze:101471014|low-density lipoprotein receptor-related protein 2-like; K06233 low density lipoprotein-related protein 2 (A)	ko04340:Hedgehog signaling pathway	Low-density lipoprotein receptor-related protein 1 (Precursor) GN=LRP1 OS=Gallus gallus (Chicken) PE=2 SV=1	T	Signal transduction mechanisms	PREDICTED: low-density lipoprotein receptor-related protein 2-like isoform X1 [Haplochromis burtoni]
LOC100708017	918	353	12.9122	5.60515	5.92575e-09	-1.42379	down	--	--	Molecular Function: transporter activity (GO:0005215);; Cellular Component: integral component of membrane (GO:0016021);; Biological Process: transmembrane transport (GO:0055085);;	K14383|0|mze:101468815|sodium/myo-inositol cotransporter-like; K14383 solute carrier family 5 (sodium/myo-inositol cotransporter), member 3 (A)	--	Sodium/glucose cotransporter 4 GN=slc5a9 OS=Danio rerio (Zebrafish) PE=2 SV=1	P	Inorganic ion transport and metabolism	PREDICTED: sodium/myo-inositol cotransporter-like [Oreochromis niloticus]
ano6	187	91	1.90666	0.967177	0.00669456	-1.07425	down	--	--	Cellular Component: integral component of membrane (GO:0016021);;	--	--	Anoctamin-10 GN=ano10 OS=Danio rerio (Zebrafish) PE=2 SV=1	P	Inorganic ion transport and metabolism	PREDICTED: anoctamin-6 [Oreochromis niloticus]
ccdc89	32	4	1.10388	0.172491	0.0032705	-2.60754	down	--	--	--	--	--	Coiled-coil domain-containing protein 89 {ECO:0000250|UniProtKB:Q8N998} OS=Danio rerio (Zebrafish) PE=2 SV=1	S	Function unknown	PREDICTED: coiled-coil domain-containing protein 89-like isoform X1 [Oreochromis niloticus]
chrdl2	77	25	3.7626	1.5723	0.00187139	-1.6073	down	--	--	--	K17280|0|mze:101486447|chordin-like protein 2-like; K17280 chordin-like protein 2 (A)	--	Chordin-like protein 1 (Precursor) GN=CHRDL1 OS=Gallus gallus (Chicken) PE=2 SV=1	R	General function prediction only	PREDICTED: chordin-like protein 2-like [Oreochromis niloticus]
LOC100700804	71	0	2.14636	0	3.55271e-15	-5.45452	down	--	--	Molecular Function: voltage-gated chloride channel activity (GO:0005247);; Biological Process: chloride transport (GO:0006821);; Cellular Component: membrane (GO:0016020);; Biological Process: regulation of ion transmembrane transport (GO:0034765);; Biological Process: regulation of anion transport (GO:0044070);;	K05025|0|mze:101475791|chloride intracellular channel protein 5-like; K05025 chloride intracellular channel protein 5 (A)	--	--	P	Inorganic ion transport and metabolism	PREDICTED: chloride intracellular channel protein 5-like isoform X1 [Oreochromis niloticus]
Tilapia_newGene_832	70	13	1.22731	0.261857	4.27529e-06	-2.33321	down	--	--	--	K16628|1.66368e-107|mze:101463794|collagen alpha-1(VII) chain-like; K16628 collagen, type VII, alpha (A)	--	Kunitz-type serine protease inhibitor 2 OS=Hemachatus haemachatus (Rinkhals) PE=1 SV=1	W	Extracellular structures	PREDICTED: collagen alpha-1(VII) chain-like [Oreochromis niloticus]
LOC100703120	120	13	2.58407	0.301426	8.85958e-14	-3.09686	down	--	--	--	--	--	--	R	General function prediction only	PREDICTED: butyrophilin subfamily 1 member A1-like [Oreochromis niloticus]
nkx6-1	41	4	0.996679	0.100631	4.14017e-05	-2.94941	down	--	--	Molecular Function: transcription regulatory region sequence-specific DNA binding (GO:0000976);; Biological Process: type B pancreatic cell differentiation (GO:0003309);; Biological Process: pancreatic A cell differentiation (GO:0003310);; Molecular Function: sequence-specific DNA binding transcription factor activity (GO:0003700);; Cellular Component: nucleus (GO:0005634);; Biological Process: r…	K08030|3.25502e-167|mze:101473270|homeobox protein Nkx-6.1-like; K08030 homeobox protein Nkx-6.1 (A)	--	Homeobox protein Nkx-6.3 GN=nkx6-3 OS=Xenopus laevis (African clawed frog) PE=2 SV=1	K	Transcription	PREDICTED: homeobox protein Nkx-6.1-like isoform X1 [Oreochromis niloticus]
tet3	118	38	0.604699	0.13694	4.15536e-05	-1.64052	down	--	--	--	--	--	CXXC-type zinc finger protein 4 GN=cxxc4 OS=Xenopus laevis (African clawed frog) PE=2 SV=1	K	Transcription	PREDICTED: methylcytosine dioxygenase TET3-like isoform X1 [Oreochromis niloticus]
pde4d	258	50	2.18394	0.470909	3.33067e-15	-2.37732	down	--	--	Molecular Function: 3',5'-cyclic-nucleotide phosphodiesterase activity (GO:0004114);; Biological Process: signal transduction (GO:0007165);; Biological Process: metabolic process (GO:0008152);; Molecular Function: metal ion binding (GO:0046872);;	K13293|0|dre:566998|pde4d, si:dkey-190g11.2; phosphodiesterase 4D, cAMP-specific; K13293 cAMP-specific phosphodiesterase 4 [EC:3.1.4.53] (A)	ko00230:Purine metabolism	Dual 3&apos;,5&apos;-cyclic-AMP and -GMP phosphodiesterase 11A GN=pde11a OS=Takifugu rubripes (Japanese pufferfish) PE=3 SV=1	T	Signal transduction mechanisms	PREDICTED: cAMP-specific 3&apos;,5&apos;-cyclic phosphodiesterase 4D-like isoform X2 [Oreochromis niloticus]
LOC100710135	119	30	1.89368	0.513737	3.85424e-07	-1.97705	down	--	--	--	--	--	Protein FAM46C GN=fam46c OS=Danio rerio (Zebrafish) PE=2 SV=1	S	Function unknown	PREDICTED: protein FAM46A-like [Oreochromis niloticus]
LOC100697991	51	10	0.348564	0.0748433	0.000376164	-2.21767	down	[T]	Signal transduction mechanisms	--	--	--	Receptor-type tyrosine-protein phosphatase gamma (Precursor) GN=PTPRG OS=Gallus gallus (Chicken) PE=2 SV=1	T	Signal transduction mechanisms	PREDICTED: receptor-type tyrosine-protein phosphatase zeta-like [Oreochromis niloticus]
LOC100696631	118	36	0.682515	0.220238	1.53064e-05	-1.71507	down	--	--	Biological Process: ossification (GO:0001503);; Molecular Function: steroid hormone receptor activity (GO:0003707);; Molecular Function: vitamin D binding (GO:0005499);; Cellular Component: nucleus (GO:0005634);; Biological Process: regulation of transcription from RNA polymerase II promoter (GO:0006357);; Molecular Function: transcription factor binding (GO:0008134);; Molecular Function: zinc io…	K08539|0|mze:101474679|vitamin D3 receptor A-like; K08539 vitamin D3 receptor (A)	--	Vitamin D3 receptor A GN=vdra OS=Danio rerio (Zebrafish) PE=1 SV=2	K	Transcription	PREDICTED: vitamin D3 receptor A-like isoform X1 [Oreochromis niloticus]
LOC100697420	1948	774	26.5431	10.5955	4.21604e-09	-1.37898	down	--	--	Molecular Function: iron ion binding (GO:0005506);; Cellular Component: collagen trimer (GO:0005581);; Cellular Component: endoplasmic reticulum (GO:0005783);; Biological Process: motor neuron axon guidance (GO:0008045);; Molecular Function: procollagen-lysine 5-dioxygenase activity (GO:0008475);; Molecular Function: oxidoreductase activity, acting on single donors with incorporation of molecular…	K13646|0|tru:100101242|fglh3; lysyl hydroxylase 3; K13646 lysyl hydroxylase/galactosyltransferase/glucosyltransferase [EC:1.14.11.4 2.4.1.50 2.4.1.66] (A)	ko00310:Lysine degradation;ko00514:Other types of O-glycan biosynthesis	Procollagen-lysine,2-oxoglutarate 5-dioxygenase 1 (Precursor) GN=PLOD1 OS=Gallus gallus (Chicken) PE=1 SV=1	O	Posttranslational modification, protein turnover, chaperones	PREDICTED: procollagen-lysine,2-oxoglutarate 5-dioxygenase 3-like isoform X2 [Oreochromis niloticus]
LOC100697693	217	16	4.2187	0.394181	0	-3.67502	down	--	--	Molecular Function: calcium ion binding (GO:0005509);; Cellular Component: plasma membrane (GO:0005886);; Biological Process: homophilic cell adhesion via plasma membrane adhesion molecules (GO:0007156);; Cellular Component: integral component of membrane (GO:0016021);;	--	--	Cadherin-11 (Precursor) GN=CDH11 OS=Gallus gallus (Chicken) PE=2 SV=1	T	Signal transduction mechanisms	PREDICTED: neural-cadherin-like [Oreochromis niloticus]
LOC100701110	152	62	3.29318	0.808677	0.00056677	-1.31937	down	[R]	General function prediction only	--	K01528|0|mze:101484724|dynamin-2-like; K01528 dynamin GTPase [EC:3.6.5.5] (A)	ko04144:Endocytosis	Dynamin-1-like protein GN=dnm1l OS=Danio rerio (Zebrafish) PE=2 SV=1	U	Intracellular trafficking, secretion, and vesicular transport	PREDICTED: dynamin-2-like isoform X3 [Oreochromis niloticus]
tmem150c	111	31	2.48163	0.751982	5.75426e-06	-1.83329	down	--	--	--	--	--	Transmembrane protein 150B (Precursor) GN=tmem150b OS=Danio rerio (Zebrafish) PE=2 SV=1	S	Function unknown	PREDICTED: transmembrane protein 150C-like [Neolamprologus brichardi]
bcl11a	82	4	0.606263	0.0349191	2.73115e-13	-3.92112	down	[R]	General function prediction only	--	--	--	MDS1 and EVI1 complex locus protein EVI1-B GN=mecom-b OS=Xenopus laevis (African clawed frog) PE=2 SV=1	K	Transcription	PREDICTED: B-cell lymphoma/leukemia 11A-like isoform X1 [Oreochromis niloticus]
pvrl1	260	100	2.14765	0.888384	4.1597e-06	-1.41251	down	--	--	--	K06081|0|mze:101481860|poliovirus receptor-related protein 1-like; K06081 poliovirus receptor-related protein 1 (A)	ko04514:Cell adhesion molecules (CAMs);ko04520:Adherens junction;ko05168:Herpes simplex infection	Nectin-3-like protein (Precursor) GN=pvrl3l OS=Danio rerio (Zebrafish) PE=2 SV=2	T	Signal transduction mechanisms	PREDICTED: poliovirus receptor-related protein 1-like isoform X1 [Oreochromis niloticus]
LOC100693428	87	33	0.687682	0.264271	0.00636225	-1.40205	down	--	--	--	--	--	Myotubularin-related protein 13 GN=sbf2 OS=Xenopus laevis (African clawed frog) PE=2 SV=1	Z	Cytoskeleton	PREDICTED: pleckstrin homology-like domain family B member 2-like [Oreochromis niloticus]
stxbp5	113	44	0.858914	0.338058	0.00166624	-1.37595	down	--	--	--	K08518|0|mze:101485226|syntaxin-binding protein 5-like; K08518 syntaxin-binding protein 5 (A)	--	Syntaxin-binding protein 5-like GN=stxbp5l OS=Danio rerio (Zebrafish) PE=3 SV=1	U	Intracellular trafficking, secretion, and vesicular transport	PREDICTED: syntaxin-binding protein 5-like isoform X1 [Oreochromis niloticus]
znfx1	64	152	0.410416	0.977607	0.00503775	1.17788	up	[L]	Replication, recombination and repair	--	--	--	Putative regulator of nonsense transcripts 1 GN=rent1 OS=Takifugu rubripes (Japanese pufferfish) PE=3 SV=1	L	Replication, recombination and repair	PREDICTED: NFX1-type zinc finger-containing protein 1 [Oreochromis niloticus]
LOC100701737	1358	3621	58.7461	158.648	4.89661e-09	1.36447	up	[R]	General function prediction only	Biological Process: sodium ion transport (GO:0006814);; Molecular Function: bile acid:sodium symporter activity (GO:0008508);; Cellular Component: membrane (GO:0016020);;	K14341|0|mze:101486733|sodium/bile acid cotransporter-like; K14341 solute carrier family 10 (sodium/bile acid cotransporter), member 1 (A)	--	--	P	Inorganic ion transport and metabolism	PREDICTED: sodium/bile acid cotransporter-like isoform X1 [Oreochromis niloticus]
LOC100697895	32	0	4.12173	0	3.9274e-06	-4.34433	down	--	--	Molecular Function: calcium ion binding (GO:0005509);;	--	--	Protein S100-A11 GN=S100A11 OS=Gallus gallus (Chicken) PE=1 SV=2	U	Intracellular trafficking, secretion, and vesicular transport	PREDICTED: protein S100-A13-like [Oreochromis niloticus]
LOC100707044	216	39	5.79018	1.13817	1.12133e-14	-2.46779	down	--	--	--	--	--	--	P	Inorganic ion transport and metabolism	PREDICTED: uncharacterized protein LOC100707044 isoform X2 [Oreochromis niloticus]
hgd	35	6	1.05289	0.176536	0.00700335	-2.29778	down	[Q]	Secondary metabolites biosynthesis, transport and catabolism	Molecular Function: homogentisate 1,2-dioxygenase activity (GO:0004411);; Biological Process: L-phenylalanine catabolic process (GO:0006559);; Biological Process: tyrosine metabolic process (GO:0006570);; Biological Process: oxidation-reduction process (GO:0055114);;	K00451|0|mze:101477821|homogentisate 1,2-dioxygenase-like; K00451 homogentisate 1,2-dioxygenase [EC:1.13.11.5] (A)	ko00350:Tyrosine metabolism	--	E	Amino acid transport and metabolism	PREDICTED: homogentisate 1,2-dioxygenase-like [Oreochromis niloticus]
nox4	89	3	1.01361	0.0485523	1.88738e-15	-4.31457	down	--	--	Cellular Component: integral component of membrane (GO:0016021);; Molecular Function: oxidoreductase activity (GO:0016491);; Biological Process: oxidation-reduction process (GO:0055114);;	--	--	--	Q	Secondary metabolites biosynthesis, transport and catabolism	PREDICTED: NADPH oxidase 4-like isoform X1 [Oreochromis niloticus]
LOC100699135	1268	2792	10.4872	24.1702	2.14175e-05	1.08839	up	[R]	General function prediction only	--	--	--	Serine/threonine-protein phosphatase 6 regulatory ankyrin repeat subunit C GN=ankrd52 OS=Danio rerio (Zebrafish) PE=2 SV=1	2244	General function prediction only	PREDICTED: KN motif and ankyrin repeat domain-containing protein 1-like isoform X1 [Oreochromis niloticus]
itga2	140	51	1.32759	0.521145	0.000104771	-1.47548	down	--	--	Biological Process: cell adhesion (GO:0007155);; Biological Process: integrin-mediated signaling pathway (GO:0007229);; Cellular Component: integrin complex (GO:0008305);;	K06481|0|mze:101463902|integrin alpha-2-like; K06481 integrin alpha 2 (A)	ko04145:Phagosome;ko04510:Focal adhesion;ko04512:ECM-receptor interaction;ko04810:Regulation of actin cytoskeleton	Integrin alpha-1 (Fragment) GN=ITGA1 OS=Gallus gallus (Chicken) PE=2 SV=1	W	Extracellular structures	PREDICTED: integrin alpha-2 [Oreochromis niloticus]
LOC102080506	280	48	5.43675	0.927903	0	-2.55155	down	--	--	--	--	--	--	S	Function unknown	PREDICTED: uncharacterized protein LOC102080506 isoform X1 [Oreochromis niloticus]
tfpi2	554	138	25.3831	6.6334	7.77156e-16	-2.04107	down	--	--	Molecular Function: serine-type endopeptidase inhibitor activity (GO:0004867);; Cellular Component: extracellular region (GO:0005576);; Biological Process: blood coagulation (GO:0007596);; Biological Process: negative regulation of peptidase activity (GO:0010466);;	--	--	Kunitz-type serine protease inhibitor bitisilin-3 (Fragment) OS=Bitis gabonica (Gaboon adder) PE=2 SV=1	O	Posttranslational modification, protein turnover, chaperones	PREDICTED: tissue factor pathway inhibitor 2-like [Oreochromis niloticus]
LOC100690521	208	92	1.21929	0.535462	0.000530306	-1.21104	down	--	--	Molecular Function: G-protein coupled receptor activity (GO:0004930);; Biological Process: G-protein coupled receptor signaling pathway (GO:0007186);; Cellular Component: integral component of membrane (GO:0016021);;	K08404|0|mze:101487239|uracil nucleotide/cysteinyl leukotriene receptor-like; K08404 G protein-coupled receptor 17 (A)	--	G-protein coupled receptor 183-A GN=gpr183a OS=Danio rerio (Zebrafish) PE=2 SV=1	T	Signal transduction mechanisms	PREDICTED: uracil nucleotide/cysteinyl leukotriene receptor-like [Oreochromis niloticus]
LOC100698867	189	65	0.822685	0.270415	2.52781e-06	-1.56426	down	[KL]	--	--	K11642|0|mze:101477315|chromodomain-helicase-DNA-binding protein 3-like; K11642 chromodomain-helicase-DNA-binding protein 3 [EC:3.6.4.12] (A)	--	Chromodomain-helicase-DNA-binding protein 1 GN=CHD1 OS=Gallus gallus (Chicken) PE=1 SV=1	R	General function prediction only	PREDICTED: chromodomain-helicase-DNA-binding protein 3 isoform X1 [Oreochromis niloticus]
LOC100702375	128	48	1.74346	0.672286	0.000358522	-1.43231	down	[G]	Carbohydrate transport and metabolism	--	K00850|0|mze:101472402|6-phosphofructokinase type C-like; K00850 6-phosphofructokinase 1 [EC:2.7.1.11] (A)	ko00010:Glycolysis / Gluconeogenesis;ko00030:Pentose phosphate pathway;ko00051:Fructose and mannose metabolism;ko00052:Galactose metabolism;ko01200:Carbon metabolism;ko01230:Biosynthesis of amino acids;ko03018:RNA degradation	--	G	Carbohydrate transport and metabolism	PREDICTED: 6-phosphofructokinase type C-like isoform X3 [Oreochromis niloticus]
LOC100702855	280	123	5.17149	2.4457	0.000100215	-1.22466	down	[E]	Amino acid transport and metabolism	Biological Process: amino acid transmembrane transport (GO:0003333);; Molecular Function: amino acid transmembrane transporter activity (GO:0015171);; Cellular Component: integral component of membrane (GO:0016021);;	K13782|0|mze:101481302|asc-type amino acid transporter 1-like; K13782 solute carrier family 7 (L-type amino acid transporter), member 10 (A)	--	Y+L amino acid transporter 2 OS=Xenopus tropicalis (Western clawed frog) PE=2 SV=1	E	Amino acid transport and metabolism	PREDICTED: asc-type amino acid transporter 1-like [Oreochromis niloticus]
Tilapia_newGene_5205	159	902	6.07236	19.8221	0	2.44253	up	--	--	--	--	--	--	--	--	PREDICTED: putative uncharacterized protein FLJ22184-like [Maylandia zebra]
wscd2	118	25	1.37548	0.30699	1.62889e-08	-2.21256	down	--	--	Molecular Function: sulfotransferase activity (GO:0008146);;	--	--	WSC domain-containing protein 2 GN=wscd2 OS=Danio rerio (Zebrafish) PE=3 SV=1	O	Posttranslational modification, protein turnover, chaperones	PREDICTED: WSC domain-containing protein 2-like isoform X1 [Oreochromis niloticus]
ano8	123	356	0.758426	4.11086	2.38242e-07	1.47149	up	--	--	--	--	--	Anoctamin-10 GN=ano10 OS=Danio rerio (Zebrafish) PE=2 SV=1	D	Cell cycle control, cell division, chromosome partitioning	PREDICTED: anoctamin-8-like isoform X1 [Pundamilia nyererei]
LOC102077028	354	92	4.63822	1.28974	7.17315e-13	-1.9735	down	--	--	--	--	--	--	R	General function prediction only	PREDICTED: uncharacterized protein LOC102786105 [Neolamprologus brichardi]
LOC100703406	13	158	0.413864	4.54777	0	3.39649	up	--	--	--	--	--	Olfactomedin (Precursor) OS=Lithobates catesbeiana (American bullfrog) PE=1 SV=1	W	Extracellular structures	PREDICTED: olfactomedin-4-like isoform X2 [Oreochromis niloticus]
LOC106097701	149	415	22.741	77.8792	3.21946e-07	1.41844	up	[F]	Nucleotide transport and metabolism	Molecular Function: N6-(1,2-dicarboxyethyl)AMP AMP-lyase (fumarate-forming) activity (GO:0004018);; Cellular Component: cytoplasm (GO:0005737);; Biological Process: purine ribonucleotide biosynthetic process (GO:0009152);;	K01756|5.68859e-82|tru:101072237|adenylosuccinate lyase-like; K01756 adenylosuccinate lyase [EC:4.3.2.2] (A)	ko00230:Purine metabolism;ko00250:Alanine, aspartate and glutamate metabolism	Adenylosuccinate lyase GN=ADSL OS=Gallus gallus (Chicken) PE=2 SV=2	F	Nucleotide transport and metabolism	PREDICTED: adenylosuccinate lyase-like isoform X2 [Oreochromis niloticus]
LOC100705232	652	216	7.16262	2.19451	5.11419e-11	-1.63545	down	--	--	--	K16449|0|mze:101482755|regulator of G-protein signaling 6-like; K16449 regulator of G-protein signaling (A)	--	Regulator of G-protein signaling 17 GN=RGS17 OS=Gallus gallus (Chicken) PE=2 SV=1	T	Signal transduction mechanisms	PREDICTED: regulator of G-protein signaling 6-like isoform X2 [Oreochromis niloticus]
LOC100690652	226	108	3.61997	1.73879	0.00206687	-1.10246	down	[RTKL]	--	Molecular Function: protein serine/threonine kinase activity (GO:0004674);; Molecular Function: ATP binding (GO:0005524);; Biological Process: protein phosphorylation (GO:0006468);; Biological Process: cell communication (GO:0007154);; Molecular Function: phosphatidylinositol binding (GO:0035091);;	K13302|0|mze:101469250|serine/threonine-protein kinase Sgk1-like; K13302 serum/glucocorticoid-regulated kinase 1 [EC:2.7.11.1] (A)	ko04068:FoxO signaling pathway	Serine/threonine-protein kinase Sgk1 GN=SGK1 OS=Gallus gallus (Chicken) PE=2 SV=1	T	Signal transduction mechanisms	PREDICTED: serine/threonine-protein kinase Sgk1-like isoform X1 [Oreochromis niloticus]
LOC100696606	370	876	11.0873	27.2623	5.17444e-06	1.19042	up	--	--	--	K06484|0|mze:101474604|integrin alpha-5-like; K06484 integrin alpha 5 (A)	ko04145:Phagosome;ko04510:Focal adhesion;ko04512:ECM-receptor interaction;ko04810:Regulation of actin cytoskeleton	Integrin alpha-5 light chain (Precursor) GN=itga5 OS=Xenopus laevis (African clawed frog) PE=2 SV=1	W	Extracellular structures	PREDICTED: integrin alpha-5-like [Oreochromis niloticus]
Tilapia_newGene_3224	55	15	0.472968	0.139233	0.00412256	-1.8105	down	--	--	--	--	--	Small membrane A-kinase anchor protein OS=Danio rerio (Zebrafish) PE=3 SV=1	S	Function unknown	PREDICTED: small membrane A-kinase anchor protein-like [Oreochromis niloticus]
LOC100711956	531	259	3.30081	1.56449	0.00018295	-1.08009	down	--	--	--	K15291|0|mze:101482845|regulating synaptic membrane exocytosis protein 1-like; K15291 regulating synaptic membrane exocytosis protein 1 (A)	--	Protein piccolo (Fragment) GN=PCLO OS=Gallus gallus (Chicken) PE=2 SV=1	U	Intracellular trafficking, secretion, and vesicular transport	PREDICTED: regulating synaptic membrane exocytosis protein 2-like isoform X1 [Oreochromis niloticus]
LOC100709945	118	4	6.51287	0.239215	0	-4.43747	down	--	--	Molecular Function: G-protein coupled receptor activity (GO:0004930);; Biological Process: signal transduction (GO:0007165);;	K05050|2.09186e-137|mze:101487265|c-X-C chemokine receptor type 1-like; K05050 interleukin 8 receptor beta (A)	ko04060:Cytokine-cytokine receptor interaction;ko04144:Endocytosis	C-X-C chemokine receptor type 4-B GN=cxcr4-b OS=Xenopus laevis (African clawed frog) PE=2 SV=1	--	--	PREDICTED: c-X-C chemokine receptor type 2-like [Oreochromis niloticus]
Tilapia_newGene_5104	262	112	13.2883	6.60478	6.86748e-05	-1.2626	down	--	--	--	--	--	--	R	General function prediction only	PREDICTED: uncharacterized protein LOC102208681 isoform X1 [Pundamilia nyererei]
yjefn3	126	48	4.19055	1.53579	0.000536651	-1.40989	down	[S]	Function unknown	--	--	--	NAD(P)H-hydrate epimerase {ECO:0000255|HAMAP-Rule:MF_03159} (Precursor) GN=apoa1bp OS=Xenopus tropicalis (Western clawed frog) PE=3 SV=1	S	Function unknown	PREDICTED: yjeF N-terminal domain-containing protein 3-like [Oreochromis niloticus]
aldh8a1	2	36	0.0579278	0.810759	6.65545e-05	3.31707	up	[C]	Energy production and conversion	Biological Process: liver development (GO:0001889);; Cellular Component: cytoplasm (GO:0005737);; Molecular Function: oxidoreductase activity, acting on the aldehyde or oxo group of donors, NAD or NADP as acceptor (GO:0016620);; Biological Process: oxidation-reduction process (GO:0055114);;	--	--	Aldehyde dehydrogenase family 8 member A1 GN=aldh8a1 OS=Danio rerio (Zebrafish) PE=2 SV=1	C	Energy production and conversion	PREDICTED: aldehyde dehydrogenase family 8 member A1-like isoformX1 [Oreochromis niloticus]
gata4	305	60	3.80505	0.858764	3.33067e-16	-2.3623	down	[K]	Transcription	Biological Process: liver development (GO:0001889);; Biological Process: heart looping (GO:0001947);; Molecular Function: sequence-specific DNA binding transcription factor activity (GO:0003700);; Cellular Component: nucleus (GO:0005634);; Molecular Function: zinc ion binding (GO:0008270);; Biological Process: myeloid cell differentiation (GO:0030099);; Molecular Function: sequence-specific DNA b…	K09183|0|mze:101481014|transcription factor GATA-4-like; K09183 GATA-binding protein 4 (A)	--	Transcription factor GATA-4 GN=gata4 OS=Xenopus laevis (African clawed frog) PE=2 SV=1	K	Transcription	GATA4 [Oreochromis niloticus]
rasl11a	123	50	2.77925	1.14706	0.00201178	-1.31868	down	[R]	General function prediction only	Molecular Function: GTPase activity (GO:0003924);; Molecular Function: GTP binding (GO:0005525);; Cellular Component: nucleolus (GO:0005730);; Biological Process: GTP catabolic process (GO:0006184);; Biological Process: small GTPase mediated signal transduction (GO:0007264);; Cellular Component: membrane (GO:0016020);; Biological Process: positive regulation of transcription from RNA polymerase I…	K07852|1.75957e-178|mze:101475739|ras-like protein family member 11A-like; K07852 Ras-like protein family member 11A (A)	--	Ras-like protein family member 11A-like GN=zgc:110179 OS=Danio rerio (Zebrafish) PE=2 SV=1	R	General function prediction only	PREDICTED: ras-like protein family member 11A-like [Maylandia zebra]
LOC100702076	57	4	0.853925	0.0649016	2.05357e-08	-3.40894	down	--	--	--	--	--	Zinc finger protein 385B GN=znf385b OS=Danio rerio (Zebrafish) PE=2 SV=1	R	General function prediction only	PREDICTED: zinc finger protein 385A-like [Maylandia zebra]
phgdh	600	283	14.5209	6.86824	4.60584e-05	-1.12878	down	[HE]	--	Molecular Function: phosphoglycerate dehydrogenase activity (GO:0004617);; Biological Process: L-serine biosynthetic process (GO:0006564);; Molecular Function: NAD binding (GO:0051287);; Biological Process: oxidation-reduction process (GO:0055114);;	K00058|0|mze:101474426|d-3-phosphoglycerate dehydrogenase-like; K00058 D-3-phosphoglycerate dehydrogenase [EC:1.1.1.95] (A)	ko00260:Glycine, serine and threonine metabolism;ko01200:Carbon metabolism;ko01230:Biosynthesis of amino acids	C-terminal-binding protein 2 GN=ctbp2 OS=Xenopus laevis (African clawed frog) PE=1 SV=1	E	Amino acid transport and metabolism	PREDICTED: d-3-phosphoglycerate dehydrogenase-like [Oreochromis niloticus]
kiaa1644	40	6	0.559741	0.058534	0.000753615	-2.48225	down	--	--	--	--	--	Uncharacterized protein KIAA1644 homolog (Precursor) OS=Danio rerio (Zebrafish) PE=2 SV=2	R	General function prediction only	PREDICTED: uncharacterized protein KIAA1644 homolog isoform X1 [Oreochromis niloticus]
LOC100697214	563	287	4.87961	4.42298	0.00059416	-1.01709	down	--	--	--	--	--	--	U	Intracellular trafficking, secretion, and vesicular transport	PREDICTED: ras and Rab interactor 2-like [Oreochromis niloticus]
LOC100700688	123	0	3.09338	0	0	-6.23331	down	--	--	--	--	--	Stonustoxin subunit beta OS=Synanceia horrida (Estuarine stonefish) PE=1 SV=3	1353	Function unknown	PREDICTED: stonustoxin subunit beta-like [Oreochromis niloticus]
macc1	319	108	3.89258	1.36111	1.98724e-08	-1.59663	down	--	--	--	--	--	SH3 domain-binding protein 4 GN=sh3bp4 OS=Seriola quinqueradiata (Five-ray yellowtail) PE=2 SV=1	S	Function unknown	PREDICTED: metastasis-associated in colon cancer protein 1 [Oreochromis niloticus]
LOC100704864	247	515	2.94549	5.86111	0.00104171	1.00586	up	[K]	Transcription	Molecular Function: sequence-specific DNA binding transcription factor activity (GO:0003700);; Biological Process: regulation of transcription, DNA-templated (GO:0006355);; Molecular Function: sequence-specific DNA binding (GO:0043565);;	K09404|0|mze:101484886|forkhead box protein K2-like; K09404 forkhead box protein K (A)	--	Forkhead box protein K2 OS=Xenopus laevis (African clawed frog) PE=2 SV=2	K	Transcription	PREDICTED: forkhead box protein K2 [Oreochromis niloticus]
LOC100704181	296	147	2.70454	1.33782	0.001809	-1.05046	down	--	--	--	K06732|0|mze:101476980|CUB domain-containing protein 1-like; K06732 CUB domain-containing protein 1 (A)	--	--	S	Function unknown	PREDICTED: CUB domain-containing protein 1-like [Oreochromis niloticus]
gng2	138	53	4.19662	1.71955	0.000329381	-1.40125	down	--	--	Biological Process: sprouting angiogenesis (GO:0002040);; Molecular Function: signal transducer activity (GO:0004871);; Cellular Component: cytosol (GO:0005829);; Cellular Component: heterotrimeric G-protein complex (GO:0005834);; Biological Process: G-protein coupled receptor signaling pathway (GO:0007186);; Biological Process: cell proliferation (GO:0008283);; Biological Process: vascular endot…	K07826|3.48957e-44|xma:102223285|guanine nucleotide-binding protein G(I)/G(S)/G(O) subunit gamma-2-like; K07826 guanine nucleotide-binding protein G(I)/G(S)/G(O) subunit gamma-2 (A)	--	--	T	Signal transduction mechanisms	Guanine nucleotide-binding protein GI/GS/GO subunit gamma-2 [Salmo salar]
LOC100709239	2763	1103	56.3331	22.2172	3.48325e-09	-1.37278	down	--	--	Biological Process: neural tube formation (GO:0001841);; Cellular Component: nucleus (GO:0005634);; Cellular Component: cytoplasm (GO:0005737);; Cellular Component: apical plasma membrane (GO:0016324);; Biological Process: spinal cord development (GO:0021510);; Cellular Component: cleavage furrow (GO:0032154);; Biological Process: embryonic heart tube development (GO:0035050);; Biological Process…	K06093|0|mze:101479882|partitioning defective 6 homolog gamma-like; K06093 partitioning defective protein 6 (A)	ko04144:Endocytosis;ko04530:Tight junction	MAGUK p55 subfamily member 5-A GN=mpp5a OS=Danio rerio (Zebrafish) PE=1 SV=2	T	Signal transduction mechanisms	PREDICTED: partitioning defective 6 homolog gamma-like [Oreochromis niloticus]
LOC100695879	657	39	16.1945	0.916252	0	-4.06527	down	[R]	General function prediction only	Molecular Function: nucleic acid binding (GO:0003676);; Molecular Function: metal ion binding (GO:0046872);;	K09198|0|mze:101468657|transcription factor Sp8-like; K09198 transcription factor Sp8 (A)	--	Transcription factor Sp8 GN=sp8b OS=Danio rerio (Zebrafish) PE=2 SV=1	K	Transcription	PREDICTED: transcription factor Sp8-like [Oreochromis niloticus]
Tilapia_newGene_4045	7	54	0.236985	1.62918	1.7612e-05	2.63677	up	--	--	--	--	--	--	S	Function unknown	unnamed protein product [Oncorhynchus mykiss]
gpr153	486	167	4.89359	1.75118	1.47984e-09	-1.58064	down	--	--	Molecular Function: G-protein coupled receptor activity (GO:0004930);; Biological Process: G-protein coupled receptor signaling pathway (GO:0007186);; Cellular Component: integral component of membrane (GO:0016021);;	K08437|0|mze:101467795|probable G-protein coupled receptor 153-like; K08437 G protein-coupled receptor 153 (A)	--	--	T	Signal transduction mechanisms	PREDICTED: probable G-protein coupled receptor 153 [Oreochromis niloticus]
LOC100696736	142	57	1.77495	0.64084	0.000638696	-1.34019	down	--	--	--	K05058|0|mze:101465439|leukemia inhibitory factor receptor-like; K05058 leukemia inhibitory factor receptor (A)	ko04060:Cytokine-cytokine receptor interaction;ko04630:Jak-STAT signaling pathway	--	T	Signal transduction mechanisms	PREDICTED: leukemia inhibitory factor receptor-like [Oreochromis niloticus]
LOC100711234	92	227	1.70639	4.52605	0.000281923	1.23874	up	--	--	--	--	--	--	R	General function prediction only	PREDICTED: F-box/LRR-repeat protein 3-like [Oreochromis niloticus]
lama3	867	287	4.90982	1.27636	9.94249e-12	-1.6385	down	--	--	--	K06240|0|mze:101467834|laminin subunit alpha-3-like; K06240 laminin, alpha 3/5 (A)	ko04510:Focal adhesion;ko04512:ECM-receptor interaction	Laminin subunit gamma-1 (Precursor) GN=lamc1 OS=Danio rerio (Zebrafish) PE=2 SV=2	W	Extracellular structures	PREDICTED: laminin subunit alpha-3 isoform X1 [Oreochromis niloticus]
mkx	87	28	1.09812	0.355136	0.000605438	-1.62642	down	--	--	Molecular Function: sequence-specific DNA binding transcription factor activity (GO:0003700);; Cellular Component: nucleus (GO:0005634);; Biological Process: regulation of transcription, DNA-templated (GO:0006355);; Molecular Function: sequence-specific DNA binding (GO:0043565);; Biological Process: embryonic viscerocranium morphogenesis (GO:0048703);;	--	--	Iroquois-class homeodomain protein irx-2 {ECO:0000250|UniProtKB:Q9BZI1} OS=Xenopus tropicalis (Western clawed frog) PE=2 SV=1	K	Transcription	PREDICTED: homeobox protein Mohawk-like isoformX2 [Oreochromis niloticus]
LOC100693190	30	0	0.838724	0	1.27443e-05	-4.25594	down	--	--	--	--	--	--	261	General function prediction only	PREDICTED: dentin sialophosphoprotein-like [Oreochromis niloticus]
LOC100707598	275	71	5.36849	1.451	1.32346e-11	-1.97714	down	--	--	Biological Process: proteolysis (GO:0006508);; Molecular Function: metallopeptidase activity (GO:0008237);; Molecular Function: metal ion binding (GO:0046872);;	K06704|0|mze:101471777|disintegrin and metalloproteinase domain-containing protein 10-like; K06704 disintegrin and metalloproteinase domain-containing protein 10 [EC:3.4.24.81] (A)	--	Disintegrin and metalloproteinase domain-containing protein 10 (Precursor) GN=adam10 OS=Xenopus laevis (African clawed frog) PE=2 SV=1	W	Extracellular structures	PREDICTED: disintegrin and metalloproteinase domain-containing protein 10-like [Oreochromis niloticus]
LOC100702592	164	60	4.74307	1.7768	3.38088e-05	-1.47387	down	[Q]	Secondary metabolites biosynthesis, transport and catabolism	Molecular Function: monooxygenase activity (GO:0004497);; Molecular Function: iron ion binding (GO:0005506);; Molecular Function: electron carrier activity (GO:0009055);; Molecular Function: oxidoreductase activity, acting on paired donors, with incorporation or reduction of molecular oxygen (GO:0016705);; Molecular Function: heme binding (GO:0020037);; Biological Process: oxidation-reduction pro…	K17860|0|mze:101478178|cytochrome P450 3A40-like; K17860 cytochrome P450, family 3, subfamily C (A)	--	Cytochrome P450 3A40 GN=cyp3a40 OS=Oryzias latipes (Medaka fish) PE=2 SV=1	Q	Secondary metabolites biosynthesis, transport and catabolism	PREDICTED: cytochrome P450 3A40-like [Oreochromis niloticus]
lmod3	54	0	0.786319	0	1.96952e-11	-5.06998	down	--	--	Molecular Function: tropomyosin binding (GO:0005523);; Cellular Component: cytoskeleton (GO:0005856);;	--	--	--	Z	Cytoskeleton	PREDICTED: leiomodin-3-like [Oreochromis niloticus]
slit1	597	307	3.2657	1.68898	0.000679302	-1.00481	down	[S]	Function unknown	--	K06838|0|mze:101467001|slit homolog 1 protein-like; K06838 slit 1 (A)	--	Delta-like protein C (Precursor) GN=dlc OS=Danio rerio (Zebrafish) PE=2 SV=1	T	Signal transduction mechanisms	PREDICTED: slit homolog 1 protein-like isoform X2 [Oreochromis niloticus]
LOC100698543	74	272	3.4138	11.8261	1.34462e-09	1.80577	up	--	--	Cellular Component: nucleosome (GO:0000786);; Molecular Function: DNA binding (GO:0003677);; Cellular Component: extracellular region (GO:0005576);; Cellular Component: nucleus (GO:0005634);; Biological Process: nucleosome assembly (GO:0006334);; Biological Process: xenobiotic metabolic process (GO:0006805);; Biological Process: defense response to Gram-negative bacterium (GO:0050829);; Biologica…	K11275|1.16888e-30|mze:101469306|histone H1-like; K11275 histone H1/5 (A)	--	Oncorhyncin II OS=Oncorhynchus mykiss (Rainbow trout) PE=1 SV=2	B	Chromatin structure and dynamics	PREDICTED: histone H1-like [Maylandia zebra]
gna12	225	83	2.23008	0.846883	3.73042e-06	-1.46918	down	--	--	Biological Process: in utero embryonic development (GO:0001701);; Molecular Function: GTPase activity (GO:0003924);; Molecular Function: signal transducer activity (GO:0004871);; Molecular Function: GTP binding (GO:0005525);; Cellular Component: heterotrimeric G-protein complex (GO:0005834);; Biological Process: GTP catabolic process (GO:0006184);; Biological Process: adenylate cyclase-modulating…	K04346|0|mze:101473086|guanine nucleotide-binding protein subunit alpha-12-like; K04346 guanine nucleotide-binding protein subunit alpha-12 (A)	ko04010:MAPK signaling pathway;ko04270:Vascular smooth muscle contraction;ko04810:Regulation of actin cytoskeleton	Guanine nucleotide-binding protein G(q) subunit alpha GN=gnaq OS=Xenopus laevis (African clawed frog) PE=2 SV=2	T	Signal transduction mechanisms	PREDICTED: guanine nucleotide-binding protein subunit alpha-12-like isoform X1 [Oreochromis niloticus]
st6gal2	76	170	0.68245	1.59136	0.0089622	1.09547	up	--	--	Molecular Function: beta-galactoside alpha-2,6-sialyltransferase activity (GO:0003835);; Biological Process: protein glycosylation (GO:0006486);; Cellular Component: integral component of membrane (GO:0016021);; Cellular Component: Golgi cisterna membrane (GO:0032580);;	K00779|0|mze:101464130|beta-galactoside alpha-2,6-sialyltransferase 2-like; K00779 beta-galactoside alpha2,6-sialyltransferase (sialyltransferase 2) [EC:2.4.99.1] (A)	ko00510:N-Glycan biosynthesis;ko00514:Other types of O-glycan biosynthesis	Beta-galactoside alpha-2,6-sialyltransferase 2 GN=st6gal2 OS=Takifugu rubripes (Japanese pufferfish) PE=2 SV=1	G	Carbohydrate transport and metabolism	PREDICTED: beta-galactoside alpha-2,6-sialyltransferase 2-like isoform X1 [Oreochromis niloticus]
sema3b	1899	966	14.322	7.53862	0.000118963	-1.0232	down	--	--	Molecular Function: receptor activity (GO:0004872);; Biological Process: multicellular organismal development (GO:0007275);; Cellular Component: membrane (GO:0016020);;	K06840|0|mze:101473539|semaphorin-3B-like; K06840 semaphorin 3 (A)	--	Semaphorin-3A (Precursor) GN=SEMA3A OS=Gallus gallus (Chicken) PE=1 SV=1	T	Signal transduction mechanisms	PREDICTED: semaphorin-3B isoform X1 [Oreochromis niloticus]
LOC100693623	104	364	2.38847	8.27837	3.61337e-10	1.74198	up	--	--	Molecular Function: serine-type endopeptidase activity (GO:0004252);; Biological Process: proteolysis (GO:0006508);; Molecular Function: kinase activity (GO:0016301);; Biological Process: phosphorylation (GO:0016310);; Biological Process: plasminogen activation (GO:0031639);;	K01348|0|mze:101473472|urokinase-type plasminogen activator-like; K01348 urokinase plasminogen activator [EC:3.4.21.73] (A)	--	Urokinase-type plasminogen activator chain B (Precursor) GN=PLAU OS=Gallus gallus (Chicken) PE=2 SV=1	O	Posttranslational modification, protein turnover, chaperones	PREDICTED: urokinase-type plasminogen activator-like [Oreochromis niloticus]
nfic	216	103	1.01972	0.530805	0.00238687	-1.10495	down	--	--	--	K09170|0|mze:101476871|nuclear factor 1 C-type-like; K09170 nuclear factor I/C (A)	--	Nuclear factor 1 C-type GN=NFIC OS=Gallus gallus (Chicken) PE=1 SV=1	K	Transcription	PREDICTED: nuclear factor 1 C-type isoform X1 [Oreochromis niloticus]
ror1	113	47	0.932072	0.403549	0.00496021	-1.28425	down	[RTKL]	--	--	K05122|0|xma:102231947|tyrosine-protein kinase transmembrane receptor ROR1-like; K05122 receptor tyrosine kinase-like orphan receptor 1 [EC:2.7.10.1] (A)	--	Muscle, skeletal receptor tyrosine protein kinase (Precursor) GN=MUSK OS=Gallus gallus (Chicken) PE=2 SV=1	T	Signal transduction mechanisms	PREDICTED: tyrosine-protein kinase transmembrane receptor ROR1-like isoform X2 [Oreochromis niloticus]
sox4	568	124	5.55717	1.27704	0	-2.2293	down	--	--	--	K09268|5.64206e-174|mze:101476667|transcription factor SOX-4-like; K09268 transcription factor SOX4/11/12 (SOX group C) (A)	--	Transcription factor Sox-11 OS=Xenopus tropicalis (Western clawed frog) PE=2 SV=1	K	Transcription	PREDICTED: transcription factor SOX-4-like [Oreochromis niloticus]
ppap2b	265	94	4.14761	1.53857	3.63038e-07	-1.52753	down	[I]	Lipid transport and metabolism	Molecular Function: catalytic activity (GO:0003824);; Biological Process: metabolic process (GO:0008152);; Cellular Component: membrane (GO:0016020);;	K01080|0|mze:101487182|lipid phosphate phosphohydrolase 3-like; K01080 phosphatidate phosphatase [EC:3.1.3.4] (A)	ko00561:Glycerolipid metabolism;ko00564:Glycerophospholipid metabolism;ko00565:Ether lipid metabolism;ko00600:Sphingolipid metabolism	Lipid phosphate phosphatase-related protein type 1 GN=lppr1 OS=Xenopus tropicalis (Western clawed frog) PE=2 SV=1	I	Lipid transport and metabolism	PREDICTED: lipid phosphate phosphohydrolase 3-like isoform 1 [Oreochromis niloticus]
dhodh	71	179	2.05511	5.19112	0.000649241	1.26518	up	[F]	Nucleotide transport and metabolism	Molecular Function: dihydroorotate oxidase activity (GO:0004158);; Biological Process: 'de novo' pyrimidine nucleobase biosynthetic process (GO:0006207);; Biological Process: UMP biosynthetic process (GO:0006222);; Cellular Component: membrane (GO:0016020);; Biological Process: oxidation-reduction process (GO:0055114);;	K00254|0|mze:101466007|dihydroorotate dehydrogenase (quinone), mitochondrial-like; K00254 dihydroorotate dehydrogenase [EC:1.3.5.2] (A)	ko00240:Pyrimidine metabolism	--	F	Nucleotide transport and metabolism	PREDICTED: dihydroorotate dehydrogenase (quinone), mitochondrial-like [Oreochromis niloticus]
LOC100708878	42	124	0.930043	2.81468	0.000351928	1.47651	up	--	--	Molecular Function: nucleic acid binding (GO:0003676);; Molecular Function: protein dimerization activity (GO:0046983);;	--	--	--	1176	Replication, recombination and repair	PREDICTED: zinc finger BED domain-containing protein 1-like [Oreochromis niloticus]
LOC100702039	111	41	2.86164	0.914682	0.000775106	-1.44849	down	--	--	Molecular Function: phospholipid binding (GO:0005543);;	--	--	Rho guanine nucleotide exchange factor 6 GN=ARHGEF6 OS=Gallus gallus (Chicken) PE=2 SV=1	455	Signal transduction mechanisms	PREDICTED: uncharacterized protein LOC100702039 isoform X1 [Oreochromis niloticus]
tmem107	181	67	12.0286	4.56803	2.07784e-05	-1.4598	down	--	--	--	--	--	Transmembrane protein 107 GN=tmem107 OS=Xenopus laevis (African clawed frog) PE=2 SV=1	S	Function unknown	PREDICTED: transmembrane protein 107-like isoformX1 [Oreochromis niloticus]
LOC100710176	154	6	13.338	0.5181	0	-4.38399	down	--	--	--	K04896|2.00697e-80|mze:101469108|potassium voltage-gated channel subfamily E member 2-like; K04896 potassium voltage-gated channel Isk-related subfamily E member 2 (A)	--	--	P	Inorganic ion transport and metabolism	PREDICTED: potassium voltage-gated channel subfamily E member 2-like [Oreochromis niloticus]
LOC100704494	61	12	1.32131	0.270623	4.8279e-05	-2.24112	down	[R]	General function prediction only	Molecular Function: GTP binding (GO:0005525);; Biological Process: cell cycle (GO:0007049);;	--	--	Septin-2A GN=sept2-A OS=Xenopus tropicalis (Western clawed frog) PE=2 SV=1	R	General function prediction only	PREDICTED: uncharacterized protein LOC100704494 isoform X1 [Oreochromis niloticus]
LOC100696615	173	370	4.62917	10.0923	0.00127946	1.04032	up	--	--	--	K04805|0|mze:101470481|neuronal acetylcholine receptor subunit alpha-3-like; K04805 nicotinic acetylcholine receptor alpha-3 (A)	ko04080:Neuroactive ligand-receptor interaction	Neuronal acetylcholine receptor subunit alpha-3 (Precursor) GN=chrna3 OS=Carassius auratus (Goldfish) PE=2 SV=1	T	Signal transduction mechanisms	PREDICTED: neuronal acetylcholine receptor subunit alpha-3-like [Oreochromis niloticus]
gth-rii	373	184	6.50721	3.52151	0.000707294	-1.06184	down	--	--	Molecular Function: follicle-stimulating hormone receptor activity (GO:0004963);; Cellular Component: integral component of membrane (GO:0016021);; Biological Process: follicle-stimulating hormone signaling pathway (GO:0042699);;	K04248|0|mze:101467798|lutropin-choriogonadotropic hormone receptor-like; K04248 luteinizing hormone/choriogonadotropin receptor (A)	ko04020:Calcium signaling pathway;ko04080:Neuroactive ligand-receptor interaction	Lutropin-choriogonadotropic hormone receptor {ECO:0000250|UniProtKB:P22888} (Precursor) OS=Gallus gallus (Chicken) PE=2 SV=2	T	Signal transduction mechanisms	gonadotropin receptor II precursor [Oreochromis niloticus]
LOC100705504	928	367	11.051	5.2961	1.85897e-08	-1.38355	down	--	--	Cellular Component: membrane (GO:0016020);;	--	--	--	R	General function prediction only	PREDICTED: synaptoporin-like [Oreochromis niloticus]
Tilapia_newGene_5885	52	131	3.08957	7.51454	0.00394875	1.25713	up	--	--	--	--	--	--	--	--	PREDICTED: uncharacterized protein LOC103397244 [Cynoglossus semilaevis]
LOC100693705	436	121	9.78066	2.96608	8.6986e-13	-1.88385	down	[O]	Posttranslational modification, protein turnover, chaperones	Molecular Function: peptidyl-prolyl cis-trans isomerase activity (GO:0003755);; Molecular Function: calcium ion binding (GO:0005509);; Molecular Function: FK506 binding (GO:0005528);; Biological Process: protein folding (GO:0006457);; Cellular Component: membrane (GO:0016020);; Biological Process: peptidyl-proline modification (GO:0018208);;	K09577|2.65962e-153|mze:101471944|peptidyl-prolyl cis-trans isomerase FKBP14-like; K09577 FK506-binding protein 14 [EC:5.2.1.8] (A)	--	Peptidyl-prolyl cis-trans isomerase FKBP1A GN=fkbp1a OS=Xenopus laevis (African clawed frog) PE=3 SV=3	O	Posttranslational modification, protein turnover, chaperones	PREDICTED: peptidyl-prolyl cis-trans isomerase FKBP14-like [Oreochromis niloticus]
LOC100706256	94	213	2.20937	7.15707	0.00258193	1.11712	up	[I]	Lipid transport and metabolism	Molecular Function: hydrolase activity (GO:0016787);;	K03927|1.39768e-159|mze:101468340|fatty acyl-CoA hydrolase precursor, medium chain-like; K03927 carboxylesterase 2 [EC:3.1.1.1 3.1.1.84 3.1.1.56] (A)	ko00983:Drug metabolism - other enzymes	Fatty acyl-CoA hydrolase precursor, medium chain (Precursor) OS=Anas platyrhynchos (Domestic duck) PE=1 SV=1	I	Lipid transport and metabolism	PREDICTED: carboxylesterase 5A-like [Oreochromis niloticus]
LOC100693886	8	44	0.617533	3.01138	0.00273603	2.19366	up	--	--	Biological Process: cation transport (GO:0006812);; Molecular Function: channel activity (GO:0015267);; Cellular Component: pore complex (GO:0046930);; Biological Process: pore complex assembly (GO:0046931);; Biological Process: hemolysis in other organism involved in symbiotic interaction (GO:0052331);;	--	--	--	S	Function unknown	PREDICTED: cytolysin Src-1-like [Oreochromis niloticus]
LOC102076536	135	62	1.66367	0.798864	0.00998771	-1.15022	down	--	--	--	--	--	Rab effector MyRIP GN=myrip OS=Danio rerio (Zebrafish) PE=1 SV=1	U	Intracellular trafficking, secretion, and vesicular transport	PREDICTED: melanophilin-like [Oreochromis niloticus]
kmo	75	13	1.94671	0.452414	6.92247e-07	-2.43052	down	--	--	Molecular Function: kynurenine 3-monooxygenase activity (GO:0004502);; Cellular Component: mitochondrial outer membrane (GO:0005741);; Biological Process: tryptophan catabolic process (GO:0006569);; Cellular Component: integral component of membrane (GO:0016021);; Biological Process: quinolinate biosynthetic process (GO:0019805);; Biological Process: 'de novo' NAD biosynthetic process from trypto…	K00486|0|mze:101464994|kynurenine 3-monooxygenase-like; K00486 kynurenine 3-monooxygenase [EC:1.14.13.9] (A)	ko00380:Tryptophan metabolism	Kynurenine 3-monooxygenase {ECO:0000255|HAMAP-Rule:MF_03018} OS=Danio rerio (Zebrafish) PE=2 SV=1	C	Energy production and conversion	PREDICTED: kynurenine 3-monooxygenase-like isoform X1 [Oreochromis niloticus]
LOC100706586	103	16	1.06412	0.166966	7.45535e-10	-2.61201	down	--	--	Molecular Function: nucleotide binding (GO:0000166);; Cellular Component: nucleus (GO:0005634);;	--	--	SKI family transcriptional corepressor 1 homolog-B GN=skor1b OS=Danio rerio (Zebrafish) PE=2 SV=1	K	Transcription	PREDICTED: dachshund homolog 2-like [Oreochromis niloticus]
armc2	25	1	0.356991	0.0222319	0.00187117	-3.34506	down	--	--	--	--	--	--	W	Extracellular structures	PREDICTED: armadillo repeat-containing protein 2-like isoform X1 [Oreochromis niloticus]
LOC100694626	96	30	1.19317	0.446117	0.000163181	-1.67193	down	--	--	--	--	--	--	S	Function unknown	PREDICTED: uncharacterized protein KIAA0895-like isoform X1 [Oreochromis niloticus]
LOC100711993	76	12	0.49438	0.0794814	1.79128e-07	-2.55076	down	[RTKL]	--	Biological Process: heart morphogenesis (GO:0003007);; Molecular Function: transmembrane receptor protein tyrosine kinase activity (GO:0004714);; Molecular Function: insulin-like growth factor binding (GO:0005520);; Molecular Function: ATP binding (GO:0005524);; Biological Process: anterior/posterior pattern specification (GO:0009952);; Cellular Component: integral component of membrane (GO:00160…	K05087|0|mze:101479543|insulin-like growth factor 1 receptor-like; K05087 insulin-like growth factor 1 receptor [EC:2.7.10.1] (A)	ko04068:FoxO signaling pathway;ko04114:Oocyte meiosis;ko04144:Endocytosis;ko04510:Focal adhesion;ko04520:Adherens junction;ko04914:Progesterone-mediated oocyte maturation	Insulin-like growth factor 1 receptor beta chain (Precursor) GN=igf1r OS=Xenopus laevis (African clawed frog) PE=1 SV=1	T	Signal transduction mechanisms	PREDICTED: insulin-like growth factor 1 receptor-like [Oreochromis niloticus]
LOC102075929	100	239	2.75598	6.35512	0.000459011	1.19426	up	--	--	--	K12327|0|mze:101473804|non-muscle caldesmon-like; K12327 caldesmon (A)	ko04270:Vascular smooth muscle contraction	Caldesmon, smooth muscle (Fragment) GN=CALD1 OS=Meleagris gallopavo (Common turkey) PE=1 SV=2	S	Function unknown	PREDICTED: lymphocyte-specific protein 1-like [Neolamprologus brichardi]
cfap54	3	68	0.0195642	0.359196	1.15996e-10	3.85466	up	--	--	--	--	--	--	1186	Function unknown	PREDICTED: uncharacterized protein LOC100709605 isoform X1 [Oreochromis niloticus]
LOC100705436	1612	13	48.8318	0.399924	0	-6.8263	down	[E]	Amino acid transport and metabolism	Cellular Component: cytoplasm (GO:0005737);; Molecular Function: zinc ion binding (GO:0008270);; Molecular Function: S-adenosylmethionine-homocysteine S-methyltransferase activity (GO:0008898);; Biological Process: methionine biosynthetic process (GO:0009086);; Biological Process: methylation (GO:0032259);; Molecular Function: betaine-homocysteine S-methyltransferase activity (GO:0047150);;	K00544|0|mze:101464577|betaine--homocysteine S-methyltransferase 1-like; K00544 betaine-homocysteine S-methyltransferase [EC:2.1.1.5] (A)	ko00260:Glycine, serine and threonine metabolism;ko00270:Cysteine and methionine metabolism	Betaine--homocysteine S-methyltransferase 1 GN=bhmt OS=Danio rerio (Zebrafish) PE=2 SV=1	E	Amino acid transport and metabolism	PREDICTED: betaine--homocysteine S-methyltransferase 1-like [Oreochromis niloticus]
Tilapia_newGene_834	551	4767	29.6056	240.918	0	3.05979	up	--	--	--	--	--	--	S	Function unknown	unnamed protein product [Oncorhynchus mykiss]
LOC100703631	483	164	8.57242	2.52559	9.78331e-10	-1.59762	down	[Z]	Cytoskeleton	--	K18627|0|mze:101465125|kinesin-like protein KIF25-like; K18627 kinesin family member 25 (A)	--	Carboxy-terminal kinesin 2 OS=Xenopus laevis (African clawed frog) PE=2 SV=1	Z	Cytoskeleton	PREDICTED: kinesin-like protein KIF25-like [Haplochromis burtoni]
senp5	114	48	2.40576	0.992488	0.00574801	-1.26747	down	[O]	Posttranslational modification, protein turnover, chaperones	--	K08594|0|mze:101469453|sentrin-specific protease 5-like; K08594 sentrin-specific protease 5 [EC:3.4.22.68] (A)	--	--	O	Posttranslational modification, protein turnover, chaperones	PREDICTED: sentrin-specific protease 5-like isoform X1 [Oreochromis niloticus]
LOC100702720	1420	495	12.0991	3.8316	1.6101e-11	-1.56644	down	--	--	Molecular Function: catalytic activity (GO:0003824);; Biological Process: signal transduction (GO:0007165);; Biological Process: metabolic process (GO:0008152);; Cellular Component: integral component of membrane (GO:0016021);;	--	--	Teneurin C-terminal-associated peptide GN=TENM1 OS=Gallus gallus (Chicken) PE=1 SV=1	T	Signal transduction mechanisms	PREDICTED: teneurin-1-like isoform X2 [Oreochromis niloticus]
LOC100693645	617	300	12.3952	5.9265	0.000113653	-1.08531	down	[R]	General function prediction only	Molecular Function: DNA binding (GO:0003677);; Biological Process: negative regulation of gene expression (GO:0010629);; Biological Process: erythrocyte differentiation (GO:0030218);; Biological Process: hatching (GO:0035188);; Biological Process: positive regulation of transcription, DNA-templated (GO:0045893);; Molecular Function: metal ion binding (GO:0046872);; Biological Process: hatching gl…	K17846|0|mze:101481311|Krueppel-like factor 4-like; K17846 krueppel-like factor 4 (A)	--	Transcription factor Sp9 GN=sp9 OS=Danio rerio (Zebrafish) PE=2 SV=1	K	Transcription	PREDICTED: Krueppel-like factor 4-like [Oreochromis niloticus]
lpl	4701	1502	78.2642	25.2872	1.56541e-14	-1.6943	down	--	--	Molecular Function: lipoprotein lipase activity (GO:0004465);; Cellular Component: extracellular region (GO:0005576);; Biological Process: lipid metabolic process (GO:0006629);;	K01059|0|mze:101478598|lipoprotein lipase-like; K01059 lipoprotein lipase [EC:3.1.1.34] (A)	ko00561:Glycerolipid metabolism;ko03320:PPAR signaling pathway	Lipoprotein lipase (Precursor) GN=LPL OS=Gallus gallus (Chicken) PE=1 SV=1	I	Lipid transport and metabolism	lipoprotein lipase precursor [Oreochromis niloticus]
LOC100698006	2908	1176	14.326	5.61009	6.17443e-09	-1.35421	down	[T]	Signal transduction mechanisms	--	K12331|0|mze:101467573|rho guanine nucleotide exchange factor 11-like; K12331 Rho guanine nucleotide exchange factor 11 (A)	ko04270:Vascular smooth muscle contraction	Delphilin GN=grid2ip OS=Danio rerio (Zebrafish) PE=3 SV=1	T	Signal transduction mechanisms	PREDICTED: rho guanine nucleotide exchange factor 11-like isoform X1 [Oreochromis niloticus]
trpc1	155	10	8.32635	0.251347	0	-3.79059	down	--	--	Biological Process: angiogenesis (GO:0001525);; Biological Process: vasculogenesis (GO:0001570);; Molecular Function: calcium channel activity (GO:0005262);; Cellular Component: integral component of membrane (GO:0016021);; Biological Process: filopodium assembly (GO:0046847);; Biological Process: calcium ion transmembrane transport (GO:0070588);;	K04964|0|mze:101484852|short transient receptor potential channel 1-like; K04964 transient receptor potential cation channel subfamily C member 1 (A)	--	--	P	Inorganic ion transport and metabolism	PREDICTED: short transient receptor potential channel 1 isoform X1 [Oreochromis niloticus]
bahd1	269	94	1.62306	0.594139	2.08011e-07	-1.54901	down	--	--	--	--	--	--	K	Transcription	PREDICTED: bromo adjacent homology domain-containing 1 protein-like [Oreochromis niloticus]
tmem132c	175	700	2.01142	7.90926	4.21885e-15	1.94058	up	--	--	--	K17599|0|mze:101476092|transmembrane protein 132C-like; K17599 transmembrane protein 132 (A)	--	--	S	Function unknown	PREDICTED: transmembrane protein 132C-like [Oreochromis niloticus]
xk	446	12	6.7364	0.248867	0	-5.07797	down	--	--	--	--	--	XK-related protein 6 OS=Tetraodon nigroviridis (Spotted green pufferfish) PE=2 SV=1	S	Function unknown	PREDICTED: membrane transport protein XK-like [Oreochromis niloticus]
LOC100696082	1381	638	78.0799	36.3416	4.21954e-06	-1.1613	down	[P]	Inorganic ion transport and metabolism	--	--	--	--	P	Inorganic ion transport and metabolism	PREDICTED: thiosulfate sulfurtransferase/rhodanese-like domain-containing protein 1-like [Oreochromis niloticus]
Tilapia_newGene_3189	33	4	1.6774	0.238594	0.00201249	-2.64978	down	--	--	--	K15261|6.16148e-125|mze:101480800|poly [ADP-ribose] polymerase 14-like; K15261 poly [ADP-ribose] polymerase 10/14/15 [EC:2.4.2.30] (A)	--	--	BK	-	PREDICTED: uncharacterized protein LOC102079761 [Oreochromis niloticus]
LOC102078097	6	54	0.367437	2.32286	5.28422e-06	2.81386	up	--	--	--	--	--	--	--	--	PREDICTED: lymphocyte antigen 6G-like [Oreochromis niloticus]
Tilapia_newGene_7149	344	132	7.8782	3.10918	6.40511e-07	-1.41954	down	--	--	--	--	--	--	R	General function prediction only	PREDICTED: uncharacterized protein LOC102076542 [Oreochromis niloticus]
Tilapia_newGene_362	756	344	25.2852	11.8755	7.44617e-06	-1.18132	down	--	--	Cellular Component: integral component of membrane (GO:0016021);;	--	--	--	--	--	unnamed protein product [Tetraodon nigroviridis]
LOC100696784	465	73	5.61928	0.994665	0	-2.69226	down	[G]	Carbohydrate transport and metabolism	--	--	--	Scavenger receptor class A member 5 GN=scara5 OS=Danio rerio (Zebrafish) PE=3 SV=1	R	General function prediction only	PREDICTED: HHIP-like protein 1-like isoform X1 [Oreochromis niloticus]
hsd17b3	47	10	0.83817	0.214045	0.0017996	-2.10369	down	[R]	General function prediction only	Cellular Component: endoplasmic reticulum (GO:0005783);; Biological Process: androgen biosynthetic process (GO:0006702);; Molecular Function: testosterone 17-beta-dehydrogenase (NADP+) activity (GO:0047045);; Biological Process: oxidation-reduction process (GO:0055114);;	K10207|0|mze:101468772|testosterone 17-beta-dehydrogenase 3-like; K10207 testosterone 17beta-dehydrogenase (NADP+) [EC:1.1.1.64] (A)	ko00140:Steroid hormone biosynthesis	Estradiol 17-beta-dehydrogenase 12 GN=HSD17B12 OS=Anas platyrhynchos (Domestic duck) PE=2 SV=1	Q	Secondary metabolites biosynthesis, transport and catabolism	PREDICTED: testosterone 17-beta-dehydrogenase 3-like isoform X1 [Oreochromis niloticus]
mapk15	284	88	5.8667	1.74793	3.25288e-09	-1.72022	down	[RTKL]	--	Biological Process: MAPK cascade (GO:0000165);; Molecular Function: MAP kinase activity (GO:0004707);; Molecular Function: ATP binding (GO:0005524);; Biological Process: protein phosphorylation (GO:0006468);;	K08293|0|mze:101463616|mitogen-activated protein kinase 15-like; K08293 mitogen-activated protein kinase [EC:2.7.11.24] (A)	--	Mitogen-activated protein kinase 1 GN=mapk1 OS=Xenopus laevis (African clawed frog) PE=1 SV=3	T	Signal transduction mechanisms	PREDICTED: mitogen-activated protein kinase 15-like isoform X1 [Oreochromis niloticus]
plekhg7	27	1	0.495768	0.0268384	0.000596852	-3.44944	down	[T]	Signal transduction mechanisms	Molecular Function: Rho guanyl-nucleotide exchange factor activity (GO:0005089);; Molecular Function: phospholipid binding (GO:0005543);; Biological Process: regulation of Rho protein signal transduction (GO:0035023);;	--	--	--	T	Signal transduction mechanisms	PREDICTED: pleckstrin homology domain-containing family G member 7-like isoform X1 [Oreochromis niloticus]
LOC100707124	499	251	6.60241	3.47524	0.000534015	-1.03567	down	[O]	Posttranslational modification, protein turnover, chaperones	Biological Process: cell redox homeostasis (GO:0045454);;	K09536|0|mze:101463650|dnaJ homolog subfamily C member 16-like; K09536 DnaJ homolog subfamily C member 16 (A)	--	DnaJ homolog subfamily C member 16 (Precursor) GN=DNAJC16 OS=Gallus gallus (Chicken) PE=2 SV=1	O	Posttranslational modification, protein turnover, chaperones	PREDICTED: dnaJ homolog subfamily C member 16 [Oreochromis niloticus]
gth-ri	848	234	8.02256	2.57616	1.88738e-15	-1.8992	down	--	--	Molecular Function: follicle-stimulating hormone receptor activity (GO:0004963);; Cellular Component: integral component of membrane (GO:0016021);; Biological Process: follicle-stimulating hormone signaling pathway (GO:0042699);;	K04247|0|mze:101485007|follicle-stimulating hormone receptor-like; K04247 follicle stimulating hormone receptor (A)	ko04080:Neuroactive ligand-receptor interaction	Follicle-stimulating hormone receptor (Precursor) GN=FSHR OS=Cairina moschata (Muscovy duck) PE=2 SV=1	T	Signal transduction mechanisms	gonadotropin receptor I precursor [Oreochromis niloticus]
npr3	69	12	1.38859	0.281899	2.43078e-06	-2.41448	down	--	--	Cellular Component: integral component of membrane (GO:0016021);;	K12325|0|mze:101477016|atrial natriuretic peptide receptor 3-like; K12325 atrial natriuretic peptide clearance receptor (A)	--	Atrial natriuretic peptide receptor 2 (Precursor) GN=npr2 OS=Anguilla japonica (Japanese eel) PE=2 SV=1	T	Signal transduction mechanisms	PREDICTED: atrial natriuretic peptide receptor 3-like [Oreochromis niloticus]
LOC100704906	43	3	0.662788	0.0481756	3.5245e-06	-3.29304	down	--	--	--	--	--	Neoverrucotoxin subunit beta OS=Synanceia verrucosa (Reef stonefish) PE=1 SV=1	R	General function prediction only	PREDICTED: uncharacterized protein LOC100704906 [Oreochromis niloticus]
LOC106097284	213	81	10.386	3.92846	1.21483e-05	-1.42517	down	--	--	--	--	--	--	--	--	PREDICTED: CXADR-like membrane protein-like [Pundamilia nyererei]
LOC100711354	142	345	2.9425	6.79052	5.34386e-05	1.22177	up	[R]	General function prediction only	--	--	--	Beta-TrCP GN=fbxw1 OS=Xenopus laevis (African clawed frog) PE=2 SV=1	R	General function prediction only	PREDICTED: WD repeat-containing protein 64-like [Oreochromis niloticus]
celsr1	326	149	3.89094	1.50707	0.000146252	-1.16972	down	--	--	--	K04600|0|mze:101471573|cadherin EGF LAG seven-pass G-type receptor 1-like; K04600 cadherin EGF LAG seven-pass G-type receptor 1 (A)	--	Protocadherin-15 (Precursor) GN=Pcdh15 OS=Gallus gallus (Chicken) PE=1 SV=1	T	Signal transduction mechanisms	PREDICTED: cadherin EGF LAG seven-pass G-type receptor 1-like isoform X1 [Oreochromis niloticus]
LOC100696486	52	3	0.59141	0.0323586	4.16632e-08	-3.55792	down	--	--	--	--	--	SKI family transcriptional corepressor 1 homolog-B GN=skor1b OS=Danio rerio (Zebrafish) PE=2 SV=1	K	Transcription	PREDICTED: SKI family transcriptional corepressor 1 homolog-B-like isoform X1 [Oreochromis niloticus]
LOC100706767	1203	123	12.9828	1.81904	0	-3.32128	down	--	--	--	--	--	--	S	Function unknown	PREDICTED: uncharacterized protein LOC100706767 isoform X1 [Oreochromis niloticus]
LOC100697995	697	1780	5.69059	13.9132	6.88426e-08	1.30125	up	[H]	Coenzyme transport and metabolism	Biological Process: Mo-molybdopterin cofactor biosynthetic process (GO:0006777);; Biological Process: glycine receptor clustering (GO:0072579);;	K15376|0|xma:102216699|gephyrin-like; K15376 gephyrin [EC:2.10.1.1 2.7.7.75] (A)	--	Molybdopterin molybdenumtransferase GN=GPHN OS=Gallus gallus (Chicken) PE=1 SV=1	H	Coenzyme transport and metabolism	PREDICTED: gephyrin-like isoform X3 [Oreochromis niloticus]
LOC102077866	344	22	15.8252	0.554226	0	-3.91485	down	--	--	--	K18273|1.89198e-119|mze:101478398|alpha-tectorin-like (A)	--	Alpha-tectorin (Precursor) GN=TECTA OS=Gallus gallus (Chicken) PE=1 SV=1	--	--	PREDICTED: alpha-tectorin-like [Neolamprologus brichardi]
LOC100695172	202	65	6.6408	2.441	2.57601e-07	-1.65942	down	[KR]	--	Molecular Function: N-acetyltransferase activity (GO:0008080);;	K00657|1.32406e-123|mze:101467227|diamine acetyltransferase 2-like; K00657 diamine N-acetyltransferase [EC:2.3.1.57] (A)	ko00330:Arginine and proline metabolism	Diamine acetyltransferase 1 GN=SAT1 OS=Gallus gallus (Chicken) PE=2 SV=1	E	Amino acid transport and metabolism	PREDICTED: diamine acetyltransferase 2-like [Oreochromis niloticus]
LOC102077106	139	38	2.80032	0.796987	2.96909e-07	-1.8738	down	--	--	--	K08452|0|mze:101487409|G-protein coupled receptor 56-like; K08452 G protein-coupled receptor 97 (A)	--	G-protein coupled receptor 126 (Precursor) GN=gpr126 OS=Danio rerio (Zebrafish) PE=2 SV=1	T	Signal transduction mechanisms	PREDICTED: probable G-protein coupled receptor 97-like isoform X1 [Oreochromis niloticus]
LOC100708356	231	109	3.05291	1.29966	0.00141423	-1.12071	down	[R]	General function prediction only	--	K14946|0|mze:101484198|RNA binding protein fox-1 homolog 2-like; K14946 RNA binding protein fox-1 (A)	--	RNA binding protein fox-1 homolog 2 GN=rbfox2 OS=Xenopus laevis (African clawed frog) PE=1 SV=1	R	General function prediction only	PREDICTED: RNA binding protein fox-1 homolog 2-like isoform X1 [Neolamprologus brichardi]
gabbr2	873	3178	9.1383	33.8064	4.44089e-16	1.81275	up	--	--	Molecular Function: G-protein coupled GABA receptor activity (GO:0004965);; Cellular Component: plasma membrane (GO:0005886);; Biological Process: G-protein coupled receptor signaling pathway (GO:0007186);; Cellular Component: integral component of membrane (GO:0016021);;	K04615|0|mze:101479039|gamma-aminobutyric acid type B receptor subunit 2-like; K04615 gamma-aminobutyric acid type B receptor (A)	ko04080:Neuroactive ligand-receptor interaction	G-protein coupled receptor family C group 6 member A (Precursor) GN=gprc6a OS=Danio rerio (Zebrafish) PE=1 SV=1	T	Signal transduction mechanisms	PREDICTED: gamma-aminobutyric acid type B receptor subunit 2 [Oreochromis niloticus]
eml1	282	137	4.39353	1.78267	0.00125953	-1.08138	down	[R]	General function prediction only	--	K18595|0|mze:101479091|echinoderm microtubule-associated protein-like 1-like; K18595 echinoderm microtubule-associated protein-like 1/2 (A)	--	Echinoderm microtubule-associated protein-like 4 GN=eml4 OS=Xenopus tropicalis (Western clawed frog) PE=2 SV=1	S	Function unknown	PREDICTED: echinoderm microtubule associated protein like 1 isoform X1 [Oreochromis niloticus]
LOC102076196	104	249	3.45071	8.31004	0.000360742	1.1973	up	[R]	General function prediction only	--	--	--	Oocyte zinc finger protein XlCOF22 OS=Xenopus laevis (African clawed frog) PE=3 SV=1	R	General function prediction only	PREDICTED: zinc finger protein 726-like isoform X1 [Oreochromis niloticus]
cdo1	1347	696	44.3732	24.1664	0.000256796	-1.00017	down	--	--	--	K00456|3.68525e-141|mze:101466957|cysteine dioxygenase type 1-like; K00456 cysteine dioxygenase [EC:1.13.11.20] (A)	ko00270:Cysteine and methionine metabolism;ko00430:Taurine and hypotaurine metabolism	Cysteine dioxygenase type 1 GN=cdo1 OS=Danio rerio (Zebrafish) PE=2 SV=1	E	Amino acid transport and metabolism	PREDICTED: cysteine dioxygenase type 1-like [Oreochromis niloticus]
cav1	192	73	3.85523	1.49528	2.52946e-05	-1.4234	down	--	--	--	K06278|3.60859e-131|mze:101466056|caveolin-1-like; K06278 caveolin 1 (A)	ko04144:Endocytosis;ko04510:Focal adhesion	Caveolin-1 GN=cav1 OS=Takifugu rubripes (Japanese pufferfish) PE=3 SV=1	T	Signal transduction mechanisms	PREDICTED: caveolin-1-like [Oreochromis niloticus]
LOC100692216	399	175	7.85648	3.3158	1.89462e-05	-1.2303	down	--	--	--	K11275|6.54036e-41|mze:101485921|histone H1-like; K11275 histone H1/5 (A)	--	Oncorhyncin II OS=Oncorhynchus mykiss (Rainbow trout) PE=1 SV=2	B	Chromatin structure and dynamics	PREDICTED: histone H1-like [Maylandia zebra]
slc2a10	155	18	4.03465	0.491031	4.44089e-16	-3.03963	down	[GEPR]	--	--	K08147|0|mze:101473731|solute carrier family 2, facilitated glucose transporter member 10-like; K08147 MFS transporter, SP family, solute carrier family 2 (facilitated glucose transporter), member 10 (A)	--	Solute carrier family 2, facilitated glucose transporter member 10 GN=slc2a10 OS=Xenopus tropicalis (Western clawed frog) PE=2 SV=1	P	Inorganic ion transport and metabolism	PREDICTED: solute carrier family 2, facilitated glucose transporter member 10-like isoform X1 [Oreochromis niloticus]
smad7	140	50	2.63904	0.964174	7.04666e-05	-1.50311	down	--	--	Molecular Function: sequence-specific DNA binding transcription factor activity (GO:0003700);; Cellular Component: nucleus (GO:0005634);; Cellular Component: transcription factor complex (GO:0005667);; Biological Process: regulation of transcription, DNA-templated (GO:0006355);; Biological Process: transforming growth factor beta receptor signaling pathway (GO:0007179);;	K04677|0|mze:101474753|mothers against decapentaplegic homolog 7-like; K04677 mothers against decapentaplegic homolog 6/7 (A)	ko04144:Endocytosis;ko04350:TGF-beta signaling pathway	Mothers against decapentaplegic homolog 6 GN=SMAD6 OS=Gallus gallus (Chicken) PE=2 SV=1	T	Signal transduction mechanisms	PREDICTED: mothers against decapentaplegic homolog 7-like isoform X1 [Oreochromis niloticus]
LOC100691608	154	39	1.29838	0.351253	1.55098e-08	-1.98411	down	[R]	General function prediction only	Molecular Function: neurotransmitter:sodium symporter activity (GO:0005328);; Cellular Component: integral component of plasma membrane (GO:0005887);; Biological Process: neurotransmitter transport (GO:0006836);; Biological Process: sodium ion transmembrane transport (GO:0035725);;	K05048|0|mze:101476958|sodium-dependent neutral amino acid transporter SLC6A17-like; K05048 solute carrier family 6 (neurotransmitter transporter, amino acid/orphan) member 15/16/17/18/20 (A)	--	Creatine transporter OS=Torpedo marmorata (Marbled electric ray) PE=2 SV=1	P	Inorganic ion transport and metabolism	PREDICTED: sodium-dependent neutral amino acid transporter SLC6A17-like isoform X1 [Oreochromis niloticus]
arv1	212	28	3.29433	0.489243	0	-2.89541	down	[S]	Function unknown	--	--	--	--	S	Function unknown	PREDICTED: protein ARV1-like [Oreochromis niloticus]
LOC100711782	333	1063	5.6798	23.5062	1.134e-11	1.62036	up	--	--	--	--	--	Protein FAM160B2 OS=Danio rerio (Zebrafish) PE=2 SV=1	S	Function unknown	PREDICTED: protein FAM160B2-like isoform X1 [Oreochromis niloticus]
LOC100690931	18910	44091	989.256	2189.24	4.9289e-06	1.17191	up	--	--	--	--	--	--	--	--	PREDICTED: uncharacterized transmembrane protein DDB_G0289901-like [Oreochromis niloticus]
LOC100699254	79	25	0.993915	0.358348	0.00107619	-1.64353	down	[K]	Transcription	--	--	--	--	A	RNA processing and modification	PREDICTED: cold shock domain-containing protein C2-like isoform X1 [Oreochromis niloticus]
gmppa	1558	700	41.8142	19.5288	1.19856e-06	-1.20163	down	[MJ]	--	Biological Process: biosynthetic process (GO:0009058);; Molecular Function: nucleotidyltransferase activity (GO:0016779);;	K00966|0|mze:101478431|mannose-1-phosphate guanyltransferase alpha-A-like; K00966 mannose-1-phosphate guanylyltransferase [EC:2.7.7.13] (A)	ko00051:Fructose and mannose metabolism;ko00520:Amino sugar and nucleotide sugar metabolism	Mannose-1-phosphate guanyltransferase alpha-A GN=gmppaa OS=Danio rerio (Zebrafish) PE=2 SV=1	M	Cell wall/membrane/envelope biogenesis	PREDICTED: mannose-1-phosphate guanyltransferase alpha-A-like isoform X2 [Oreochromis niloticus]
LOC100711820	613	262	4.27538	1.72656	1.50911e-06	-1.27016	down	--	--	Molecular Function: calcium ion binding (GO:0005509);; Cellular Component: plasma membrane (GO:0005886);; Biological Process: homophilic cell adhesion via plasma membrane adhesion molecules (GO:0007156);; Cellular Component: integral component of membrane (GO:0016021);;	K16500|0|mze:101480347|protocadherin-15-like; K16500 protocadherin-15 (A)	--	Protocadherin-15 (Precursor) GN=Pcdh15 OS=Gallus gallus (Chicken) PE=1 SV=1	S	Function unknown	PREDICTED: protocadherin-15 [Oreochromis niloticus]
LOC106098536	1406	109	30.8116	2.44959	0	-3.71773	down	--	--	--	--	--	--	S	Function unknown	PREDICTED: histone-lysine N-methyltransferase SETMAR-like, partial [Maylandia zebra]
LOC102082277	77	7	0.585407	0.0613285	2.98694e-10	-3.22343	down	--	--	--	--	--	--	S	Function unknown	PREDICTED: sterile alpha motif domain-containing protein 9-like isoform X1 [Haplochromis burtoni]
pla2g6	162	338	3.74999	7.46282	0.00312317	1.00429	up	[R]	General function prediction only	Biological Process: lipid metabolic process (GO:0006629);; Molecular Function: hydrolase activity (GO:0016787);;	K16343|0|mze:101485355|85/88 kDa calcium-independent phospholipase A2-like; K16343 calcium-independent phospholipase A2 [EC:3.1.1.4] (A)	ko00564:Glycerophospholipid metabolism;ko00565:Ether lipid metabolism;ko00590:Arachidonic acid metabolism;ko00591:Linoleic acid metabolism;ko00592:alpha-Linolenic acid metabolism;ko04270:Vascular smooth muscle contraction	Serine/threonine-protein phosphatase 6 regulatory ankyrin repeat subunit B GN=ANKRD44 OS=Gallus gallus (Chicken) PE=2 SV=1	I	Lipid transport and metabolism	PREDICTED: 85/88 kDa calcium-independent phospholipase A2-like [Oreochromis niloticus]
LOC100692176	66	16	1.63898	0.386787	0.000202538	-1.98266	down	--	--	--	K03211|0|mze:101484072|transcription factor ETV6-like; K03211 ETS translocation variant 6/7 (A)	ko04320:Dorso-ventral axis formation	Transcriptional regulator Erg GN=ERG OS=Gallus gallus (Chicken) PE=2 SV=1	K	Transcription	PREDICTED: transcription factor ETV6-like [Oreochromis niloticus]
rec8	240	83	6.48603	3.76456	3.89849e-07	-1.56163	down	--	--	--	K13054|0|xma:102236333|meiotic recombination protein REC8 homolog; K13054 meiotic recombination protein REC8, animal type (A)	ko04114:Oocyte meiosis	--	S	Function unknown	PREDICTED: meiotic recombination protein REC8 homolog [Oreochromis niloticus]
Tilapia_newGene_8856	257	36	6.00691	0.967683	0	-2.8272	down	--	--	--	--	--	--	R	General function prediction only	PREDICTED: uncharacterized protein LOC102789568 [Neolamprologus brichardi]
LOC100705923	1011	444	15.2953	6.85894	1.00746e-06	-1.23331	down	--	--	Biological Process: lymphangiogenesis (GO:0001946);; Molecular Function: steroid hormone receptor activity (GO:0003707);; Molecular Function: ligand-activated sequence-specific DNA binding RNA polymerase II transcription factor activity (GO:0004879);; Cellular Component: nucleus (GO:0005634);; Biological Process: regulation of transcription from RNA polymerase II promoter (GO:0006357);; Molecular…	K08548|0|mze:101476329|COUP transcription factor 2-like; K08548 COUP transcription factor 2 (A)	--	COUP transcription factor 2 GN=NR2F2 OS=Gallus gallus (Chicken) PE=2 SV=1	K	Transcription	PREDICTED: COUP transcription factor 2-like isoformX2 [Oreochromis niloticus]
hadha	230	522	4.49	9.84311	8.41443e-05	1.12744	up	[I]	Lipid transport and metabolism	Molecular Function: 3-hydroxyacyl-CoA dehydrogenase activity (GO:0003857);; Molecular Function: enoyl-CoA hydratase activity (GO:0004300);; Biological Process: fatty acid beta-oxidation (GO:0006635);; Biological Process: response to bacterium (GO:0009617);; Cellular Component: mitochondrial fatty acid beta-oxidation multienzyme complex (GO:0016507);; Molecular Function: coenzyme binding (GO:00506…	K07515|0|mze:101473024|trifunctional enzyme subunit alpha, mitochondrial-like; K07515 enoyl-CoA hydratase / long-chain 3-hydroxyacyl-CoA dehydrogenase [EC:4.2.1.17 1.1.1.211] (A)	ko00062:Fatty acid elongation;ko00071:Fatty acid degradation;ko00280:Valine, leucine and isoleucine degradation;ko00310:Lysine degradation;ko00380:Tryptophan metabolism;ko00410:beta-Alanine metabolism;ko00640:Propanoate metabolism;ko00650:Butanoate metabolism;ko01040:Biosynthesis of unsaturated fatty acids;ko01200:Carbon metabolism;ko01212:Fatty acid metabolism	3-hydroxyacyl-CoA dehydrogenase GN=ehhadh OS=Danio rerio (Zebrafish) PE=2 SV=1	I	Lipid transport and metabolism	PREDICTED: trifunctional enzyme subunit alpha, mitochondrial-like [Oreochromis niloticus]
LOC100692678	36	0	0.759698	0	3.86634e-07	-4.50634	down	[L]	Replication, recombination and repair	--	--	--	--	211	Function unknown	PREDICTED: uncharacterized protein LOC100692678 isoform X1 [Oreochromis niloticus]
LOC100698242	57	0	1.43142	0	4.1086e-12	-5.14572	down	--	--	Molecular Function: NAD(P)+-protein-arginine ADP-ribosyltransferase activity (GO:0003956);; Biological Process: protein ADP-ribosylation (GO:0006471);;	K00775|5.58845e-176|mze:101478482|NAD(P)(+)--arginine ADP-ribosyltransferase 2-like; K00775 NAD(P)-arginine ADP-ribosyltransferase [EC:2.4.2.31] (A)	--	NAD(P)(+)--arginine ADP-ribosyltransferase 2 (Precursor) OS=Gallus gallus (Chicken) PE=2 SV=1	R	General function prediction only	PREDICTED: NAD(P)(+)--arginine ADP-ribosyltransferase 2-like isoform X1 [Oreochromis niloticus]
hes4	218	109	6.54352	3.17572	0.00636679	-1.03776	down	--	--	Molecular Function: DNA binding (GO:0003677);; Cellular Component: nucleus (GO:0005634);; Biological Process: regulation of transcription, DNA-templated (GO:0006355);; Molecular Function: protein dimerization activity (GO:0046983);; Biological Process: negative regulation of neurogenesis (GO:0050768);;	K06054|0|mze:101470131|transcription factor HES-4-B-like; K06054 hairy and enhancer of split 1 (A)	ko03460:Fanconi anemia pathway;ko04330:Notch signaling pathway	Transcription factor HES-4-B OS=Xenopus laevis (African clawed frog) PE=1 SV=1	K	Transcription	PREDICTED: transcription factor HES-4-B-like isoform X1 [Oreochromis niloticus]
nop16	1871	4628	64.1043	168.302	1.46578e-07	1.25648	up	--	--	Cellular Component: nucleolus (GO:0005730);;	--	--	Nucleolar protein 16 GN=nop16 OS=Tetraodon nigroviridis (Spotted green pufferfish) PE=3 SV=1	S	Function unknown	PREDICTED: nucleolar protein 16-like [Oreochromis niloticus]
zfpm1	301	138	1.62785	0.700721	0.0002227	-1.16456	down	[R]	General function prediction only	--	K17441|0|mze:101468041|zinc finger protein ZFPM1-like; K17441 zinc finger protein ZFPM1 (A)	--	Zinc finger protein ZFPM1 (Fragment) GN=zfpm1 OS=Xenopus laevis (African clawed frog) PE=1 SV=1	K	Transcription	PREDICTED: zinc finger protein ZFPM1-like isoform X1 [Oreochromis niloticus]
LOC100690062	1034	522	4.63102	2.22647	0.000153305	-1.03305	down	--	--	--	K16578|0|mze:101480717|CLIP-associating protein 1-like; K16578 CLIP-associating protein 1/2 (A)	--	CLIP-associating protein 1-A GN=clasp1-a OS=Xenopus laevis (African clawed frog) PE=2 SV=2	R	General function prediction only	PREDICTED: CLIP-associating protein 1-like [Oreochromis niloticus]
LOC102079613	42	3	0.491498	0.0346246	5.81067e-06	-3.26036	down	--	--	--	--	--	--	1622	Function unknown	PREDICTED: myosin-11-like isoform X4 [Oreochromis niloticus]
col4a5	3086	1476	17.9108	8.05543	9.52501e-06	-1.1125	down	--	--	Molecular Function: extracellular matrix structural constituent (GO:0005201);; Cellular Component: collagen trimer (GO:0005581);; Biological Process: axon target recognition (GO:0007412);; Biological Process: extracellular matrix organization (GO:0030198);; Biological Process: retinal ganglion cell axon guidance (GO:0031290);;	K06237|1.27154e-150|mze:101472438|collagen alpha-5(IV) chain-like; K06237 collagen, type IV, alpha (A)	ko04510:Focal adhesion;ko04512:ECM-receptor interaction	--	W	Extracellular structures	PREDICTED: collagen alpha-5(IV) chain-like isoform X3 [Oreochromis niloticus]
LOC102077096	496	248	1.57882	1.0033	0.000455881	-1.04423	down	--	--	--	--	--	--	3583	Posttranslational modification, protein turnover, chaperones	PREDICTED: E3 ubiquitin-protein ligase RNF213-like [Oreochromis niloticus]
dgke	123	45	0.972287	0.383147	0.000305544	-1.46537	down	--	--	Molecular Function: diacylglycerol kinase activity (GO:0004143);; Biological Process: protein kinase C-activating G-protein coupled receptor signaling pathway (GO:0007205);; Biological Process: intracellular signal transduction (GO:0035556);;	K00901|0|mze:101476650|diacylglycerol kinase epsilon-like; K00901 diacylglycerol kinase (ATP) [EC:2.7.1.107] (A)	ko00561:Glycerolipid metabolism;ko00564:Glycerophospholipid metabolism;ko04070:Phosphatidylinositol signaling system	--	I	Lipid transport and metabolism	PREDICTED: diacylglycerol kinase epsilon [Oreochromis niloticus]
LOC100704493	66	199	1.08855	3.28092	5.542e-06	1.51948	up	[P]	Inorganic ion transport and metabolism	Molecular Function: N,N-dimethylaniline monooxygenase activity (GO:0004499);; Cellular Component: endoplasmic reticulum membrane (GO:0005789);; Molecular Function: flavin adenine dinucleotide binding (GO:0050660);; Molecular Function: NADP binding (GO:0050661);; Biological Process: oxidation-reduction process (GO:0055114);;	K00485|0|mze:101470927|dimethylaniline monooxygenase [N-oxide-forming] 5-like; K00485 dimethylaniline monooxygenase (N-oxide forming) [EC:1.14.13.8] (A)	ko00982:Drug metabolism - cytochrome P450	--	Q	Secondary metabolites biosynthesis, transport and catabolism	PREDICTED: dimethylaniline monooxygenase [N-oxide-forming] 5-like isoform X1 [Oreochromis niloticus]
dynlt1	95	25	9.17656	2.45697	1.17543e-05	-1.9046	down	--	--	--	K10420|4.86835e-76|mze:101486477|dynein light chain Tctex-type 1-like; K10420 dynein light chain Tctex-type 1 (A)	--	--	N	Cell motility	PREDICTED: dynein light chain Tctex-type 1-like [Oreochromis niloticus]
pgr	670	300	8.58726	4.11139	5.85826e-06	-1.2039	down	--	--	Molecular Function: sequence-specific DNA binding transcription factor activity (GO:0003700);; Molecular Function: steroid hormone receptor activity (GO:0003707);; Cellular Component: nucleus (GO:0005634);; Biological Process: regulation of transcription, DNA-templated (GO:0006355);; Molecular Function: zinc ion binding (GO:0008270);; Biological Process: steroid hormone mediated signaling pathway…	K08556|0|mze:101484613|progesterone receptor-like; K08556 progesterone receptor (A)	ko04114:Oocyte meiosis;ko04914:Progesterone-mediated oocyte maturation	Progesterone receptor GN=PGR OS=Gallus gallus (Chicken) PE=1 SV=1	K	Transcription	PREDICTED: progesterone receptor isoform X2 [Oreochromis niloticus]
LOC100694252	678	348	3.37933	1.75721	0.000502544	-1.00798	down	[V]	Defense mechanisms	Molecular Function: ATP binding (GO:0005524);; Biological Process: ATP catabolic process (GO:0006200);; Molecular Function: ATPase activity (GO:0016887);;	K05641|0|mze:101484083|ATP-binding cassette sub-family A member 1-like; K05641 ATP-binding cassette, subfamily A (ABC1), member 1 (A)	ko02010:ABC transporters	ATP-binding cassette sub-family B member 8, mitochondrial (Precursor) GN=abcb8 OS=Xenopus tropicalis (Western clawed frog) PE=2 SV=1	Q	Secondary metabolites biosynthesis, transport and catabolism	PREDICTED: ATP-binding cassette sub-family A member 1-like isoform X1 [Oreochromis niloticus]
LOC100693731	64	188	1.90972	5.71226	1.60484e-05	1.48146	up	[A]	RNA processing and modification	--	K12603|0|mze:101479043|CCR4-NOT transcription complex subunit 6-like; K12603 CCR4-NOT transcription complex subunit 6 [EC:3.1.13.4] (A)	ko03018:RNA degradation	CCR4-NOT transcription complex subunit 6 GN=cnot6 OS=Xenopus laevis (African clawed frog) PE=1 SV=1	K	Transcription	PREDICTED: CCR4-NOT transcription complex subunit 6-like [Oreochromis niloticus]
LOC102080379	95	3	0.617717	0.0107203	2.22045e-16	-4.40703	down	--	--	--	--	--	--	S	Function unknown	PREDICTED: uncharacterized protein LOC102300190 [Haplochromis burtoni]
LOC102077961	145	48	2.51336	0.80845	1.09673e-05	-1.61006	down	--	--	--	--	--	Neural cell adhesion molecule 1 (Precursor) GN=NCAM1 OS=Gallus gallus (Chicken) PE=1 SV=3	328	General function prediction only	PREDICTED: cell adhesion molecule 4-like [Oreochromis niloticus]
LOC102082601	109	42	1.74006	0.608511	0.00178435	-1.38926	down	--	--	--	K01047|0|mze:101477235|group 3 secretory phospholipase A2-like; K01047 secretory phospholipase A2 [EC:3.1.1.4] (A)	ko00564:Glycerophospholipid metabolism;ko00565:Ether lipid metabolism;ko00590:Arachidonic acid metabolism;ko00591:Linoleic acid metabolism;ko00592:alpha-Linolenic acid metabolism;ko04270:Vascular smooth muscle contraction	Phospholipase A2 isozymes PA3A/PA3B/PA5 OS=Heloderma suspectum (Gila monster) PE=1 SV=3	I	Lipid transport and metabolism	PREDICTED: group 3 secretory phospholipase A2-like [Oreochromis niloticus]
jam2	441	132	9.62194	3.85776	1.53018e-11	-1.77639	down	--	--	--	K06735|0|mze:101473917|junctional adhesion molecule B-like; K06735 junctional adhesion molecule 2 (A)	ko04514:Cell adhesion molecules (CAMs);ko04530:Tight junction	V-set and immunoglobulin domain-containing protein 1 (Precursor) GN=VSIG1 OS=Gallus gallus (Chicken) PE=2 SV=1	T	Signal transduction mechanisms	PREDICTED: junctional adhesion molecule B-like isoform X2 [Oreochromis niloticus]
LOC100709741	64	161	0.565515	1.39154	0.0012454	1.25997	up	[RTKL]	--	Molecular Function: nucleotide binding (GO:0000166);; Molecular Function: protein tyrosine kinase activity (GO:0004713);; Biological Process: defense response (GO:0006952);; Cellular Component: membrane (GO:0016020);; Biological Process: phosphorylation (GO:0016310);;	K05090|0|mze:101466356|macrophage colony-stimulating factor 1 receptor 2-like; K05090 macrophage colony-stimulating factor 1 receptor [EC:2.7.10.1] (A)	ko04060:Cytokine-cytokine receptor interaction;ko04144:Endocytosis	Macrophage colony-stimulating factor 1 receptor 2 (Precursor) GN=csf1r2 OS=Takifugu rubripes (Japanese pufferfish) PE=3 SV=1	T	Signal transduction mechanisms	PREDICTED: macrophage colony-stimulating factor 1 receptor 2-like [Oreochromis niloticus]
bpnt1	774	1819	24.0128	61.0605	2.12543e-06	1.18166	up	[G]	Carbohydrate transport and metabolism	Biological Process: phosphatidylinositol phosphorylation (GO:0046854);;	K01082|0|mze:101472917|3'(2'),5'-bisphosphate nucleotidase 1-like; K01082 3'(2'), 5'-bisphosphate nucleotidase [EC:3.1.3.7] (A)	ko00920:Sulfur metabolism	Inositol monophosphatase 3 GN=impad1 OS=Danio rerio (Zebrafish) PE=2 SV=1	F	Nucleotide transport and metabolism	PREDICTED: 3&apos;(2&apos;),5&apos;-bisphosphate nucleotidase 1 isoform X1 [Stegastes partitus]
LOC100692642	145	57	4.70145	1.99324	0.00036953	-1.37001	down	--	--	Molecular Function: catalytic activity (GO:0003824);; Biological Process: metabolic process (GO:0008152);; Cellular Component: membrane (GO:0016020);;	--	--	Presqualene diphosphate phosphatase OS=Danio rerio (Zebrafish) PE=2 SV=1	I	Lipid transport and metabolism	PREDICTED: presqualene diphosphate phosphatase-like [Oreochromis niloticus]
LOC106097056	46	134	1.89108	5.24581	0.000250761	1.46046	up	--	--	--	--	--	--	--	--	PREDICTED: fibroin heavy chain-like [Oreochromis niloticus]
vwa1	784	304	9.39344	3.87544	1.48761e-08	-1.41107	down	--	--	--	--	--	Collagen alpha-1(XII) chain (Precursor) GN=COL12A1 OS=Gallus gallus (Chicken) PE=1 SV=3	W	Extracellular structures	PREDICTED: von Willebrand factor A domain-containing protein 1-like [Oreochromis niloticus]
LOC100711812	277	25	3.67369	0.354252	0	-3.43215	down	--	--	--	K02296|0|mze:101470055|aryl hydrocarbon receptor nuclear translocator-like protein 1-like; K02296 aryl hydrocarbon receptor nuclear translocator-like protein 1 (A)	ko05168:Herpes simplex infection	Aryl hydrocarbon receptor nuclear translocator-like protein 1 GN=ARNTL OS=Gallus gallus (Chicken) PE=1 SV=1	K	Transcription	PREDICTED: aryl hydrocarbon receptor nuclear translocator-like protein 1-like isoform X1 [Oreochromis niloticus]
ralgds	406	168	2.39647	1.03062	2.83609e-06	-1.3136	down	--	--	--	K08732|0|mze:101479161|ral guanine nucleotide dissociation stimulator-like; K08732 ral guanine nucleotide dissociation stimulator (A)	--	Ral guanine nucleotide dissociation stimulator-like 1 GN=rgl1 OS=Danio rerio (Zebrafish) PE=2 SV=1	T	Signal transduction mechanisms	PREDICTED: ral guanine nucleotide dissociation stimulator-like isoform X1 [Maylandia zebra]
LOC100711569	108	18	4.00849	0.697903	9.88743e-10	-2.52502	down	--	--	Molecular Function: N-formyl peptide receptor activity (GO:0004982);; Biological Process: G-protein coupled receptor signaling pathway (GO:0007186);; Cellular Component: integral component of membrane (GO:0016021);;	--	--	C3a anaphylatoxin chemotactic receptor GN=c3ar1 OS=Danio rerio (Zebrafish) PE=3 SV=1	T	Signal transduction mechanisms	PREDICTED: C3a anaphylatoxin chemotactic receptor-like [Oreochromis niloticus]
clg15h6orf165	864	222	19.7704	5.10214	0	-2.00149	down	--	--	--	--	--	UPF0704 protein C6orf165 homolog OS=Danio rerio (Zebrafish) PE=2 SV=1	S	Function unknown	PREDICTED: UPF0704 protein C6orf165 homolog isoform X2 [Oreochromis niloticus]
slc16a10	108	19	2.57644	0.38253	2.45765e-09	-2.45363	down	--	--	Cellular Component: plasma membrane (GO:0005886);; Cellular Component: integral component of membrane (GO:0016021);; Biological Process: transmembrane transport (GO:0055085);;	K08187|0|mze:101481112|monocarboxylate transporter 10-like; K08187 MFS transporter, MCP family, solute carrier family 16 (monocarboxylic acid transporters), member 10 (A)	--	Monocarboxylate transporter 10 GN=slc16a10 OS=Danio rerio (Zebrafish) PE=2 SV=1	P	Inorganic ion transport and metabolism	PREDICTED: monocarboxylate transporter 10-like [Oreochromis niloticus]
LOC102077758	123	53	0.742281	0.304789	0.0054764	-1.23732	down	--	--	--	--	--	Protein shisa-9 (Precursor) GN=shisa9 OS=Xenopus tropicalis (Western clawed frog) PE=2 SV=2	S	Function unknown	PREDICTED: protein shisa-7-like isoform X1 [Oreochromis niloticus]
wdpcp	334	883	5.09209	14.0659	7.7505e-08	1.34887	up	--	--	--	--	--	WD repeat-containing and planar cell polarity effector protein fritz homolog GN=wdpcp OS=Xenopus laevis (African clawed frog) PE=1 SV=1	S	Function unknown	PREDICTED: WD repeat-containing and planar cell polarity effector protein fritz homolog isoform X1 [Oreochromis niloticus]
LOC100698212	827	351	17.3811	7.86116	4.4623e-07	-1.28163	down	--	--	Cellular Component: integral component of membrane (GO:0016021);;	K06509|1.65886e-154|mze:101484104|CD82 antigen-like; K06509 CD82 antigen (A)	ko04115:p53 signaling pathway	Tetraspanin-9 GN=tspan9 OS=Xenopus tropicalis (Western clawed frog) PE=2 SV=1	R	General function prediction only	PREDICTED: CD82 antigen-like isoform X1 [Oreochromis niloticus]
LOC102081053	131	59	6.53193	2.92017	0.00830335	-1.17694	down	--	--	--	--	--	--	R	General function prediction only	PREDICTED: interferon-induced protein with tetratricopeptide repeats 1-like [Oreochromis niloticus]
LOC100707730	1503	766	85.1618	38.6032	0.000146609	-1.02015	down	--	--	Cellular Component: nucleosome (GO:0000786);; Molecular Function: DNA binding (GO:0003677);; Cellular Component: extracellular region (GO:0005576);; Cellular Component: nucleus (GO:0005634);; Biological Process: nucleosome assembly (GO:0006334);; Biological Process: xenobiotic metabolic process (GO:0006805);; Biological Process: defense response to Gram-negative bacterium (GO:0050829);; Biologica…	K11275|1.57817e-42|mze:101483325|histone H1.10-like; K11275 histone H1/5 (A)	--	Oncorhyncin II OS=Oncorhynchus mykiss (Rainbow trout) PE=1 SV=2	B	Chromatin structure and dynamics	PREDICTED: histone H1.10-like [Oreochromis niloticus]
LOC100702908	133	45	0.596792	0.194762	3.67451e-05	-1.5767	down	[T]	Signal transduction mechanisms	Molecular Function: protein tyrosine phosphatase activity (GO:0004725);; Biological Process: peptidyl-tyrosine dephosphorylation (GO:0035335);;	K06778|0|mze:101469772|receptor-type tyrosine-protein phosphatase delta-like; K06778 receptor-type tyrosine-protein phosphatase S [EC:3.1.3.48] (A)	--	Receptor-type tyrosine-protein phosphatase F (Precursor) GN=ptprf OS=Danio rerio (Zebrafish) PE=2 SV=1	T	Signal transduction mechanisms	PREDICTED: receptor-type tyrosine-protein phosphatase delta isoform X1 [Oreochromis niloticus]
LOC102076307	290	88	4.74556	1.55151	1.35855e-09	-1.75021	down	--	--	--	--	--	--	S	Function unknown	PREDICTED: transcriptional regulator ATRX homolog [Oreochromis niloticus]
LOC100701974	67	21	0.519388	0.135474	0.00366293	-1.64514	down	--	--	--	K15682|0|mze:101469448|PDZ domain-containing protein 4-like; K15682 ligand of Numb protein X 3/4 (A)	--	Discs large homolog 1-like protein GN=dlg1l OS=Danio rerio (Zebrafish) PE=2 SV=1	R	General function prediction only	PREDICTED: PDZ domain-containing protein 4-like isoform X1 [Oreochromis niloticus]
lrr1	1558	795	33.4536	16.6258	0.00014918	-1.01845	down	[S]	Function unknown	Molecular Function: isomerase activity (GO:0016853);;	K10348|0|mze:101472684|leucine-rich repeat protein 1-like; K10348 LRR-repeat protein 1 (A)	--	Leucine-rich repeat protein SHOC-2 GN=shoc2 OS=Danio rerio (Zebrafish) PE=2 SV=1	R	General function prediction only	PREDICTED: leucine-rich repeat protein 1-like [Oreochromis niloticus]
crh	1187	2547	48.812	106.368	5.87325e-05	1.05108	up	--	--	Molecular Function: hormone activity (GO:0005179);; Cellular Component: extracellular region (GO:0005576);; Biological Process: melanosome localization (GO:0032400);; Biological Process: response to immobilization stress (GO:0035902);;	K05256|5.84517e-96|mze:101474464|corticoliberin-like; K05256 corticotropin-releasing hormone (A)	--	Corticoliberin (Precursor) GN=crh OS=Carassius auratus (Goldfish) PE=1 SV=1	T	Signal transduction mechanisms	corticoliberin-like precursor [Haplochromis burtoni]
LOC106097608	859	1985	67.12	147.511	3.84895e-06	1.15752	up	[Z]	Cytoskeleton	Molecular Function: GTPase activity (GO:0003924);; Molecular Function: structural constituent of cytoskeleton (GO:0005200);; Molecular Function: GTP binding (GO:0005525);; Cellular Component: cytoplasm (GO:0005737);; Cellular Component: microtubule (GO:0005874);; Biological Process: GTP catabolic process (GO:0006184);; Biological Process: microtubule-based process (GO:0007017);; Biological Proces…	K07374|1.38914e-159|xma:102217348|tubulin alpha-1B chain-like; K07374 tubulin alpha (A)	ko04145:Phagosome;ko04540:Gap junction	Tubulin alpha chain OS=Torpedo marmorata (Marbled electric ray) PE=2 SV=1	Z	Cytoskeleton	PREDICTED: tubulin alpha-1B chain-like, partial [Xiphophorus maculatus]
hpse2	487	225	6.67569	3.47235	4.45584e-05	-1.1573	down	--	--	Biological Process: carbohydrate metabolic process (GO:0005975);; Cellular Component: membrane (GO:0016020);; Molecular Function: hydrolase activity, acting on glycosyl bonds (GO:0016798);;	K07965|0|mze:101464618|inactive heparanase-2-like; K07965 heparanase 2 [EC:3.2.1.-] (A)	ko00531:Glycosaminoglycan degradation	Heparanase (Precursor) GN=HPSE OS=Gallus gallus (Chicken) PE=1 SV=1	G	Carbohydrate transport and metabolism	PREDICTED: inactive heparanase-2 isoform X1 [Oreochromis niloticus]
LOC102079960	66	172	2.36953	9.29116	0.000412272	1.31105	up	--	--	--	K17599|0|mze:101477207|transmembrane protein 132C-like; K17599 transmembrane protein 132 (A)	--	--	S	Function unknown	PREDICTED: transmembrane protein 132C-like [Oreochromis niloticus]
LOC100693000	1088	516	12.569	6.15223	1.59122e-05	-1.123	down	--	--	--	--	--	Inverted formin-2 GN=inf2 OS=Xenopus tropicalis (Western clawed frog) PE=2 SV=1	912	Cytoskeleton	PREDICTED: FH2 domain-containing protein 1-like isoform X2 [Oreochromis niloticus]
scarf2	71	22	0.523235	0.176045	0.00199201	-1.66468	down	--	--	--	--	--	Multiple epidermal growth factor-like domains protein 10 (Precursor) GN=megf10 OS=Xenopus tropicalis (Western clawed frog) PE=2 SV=1	T	Signal transduction mechanisms	PREDICTED: scavenger receptor class F member 2-like [Oreochromis niloticus]
thbs4	3	35	0.0475126	0.422377	0.000503719	2.92955	up	--	--	Molecular Function: calcium ion binding (GO:0005509);; Cellular Component: extracellular region (GO:0005576);; Biological Process: cell adhesion (GO:0007155);;	K04659|0|ola:101162687|thrombospondin-4-B-like; K04659 thrombospondin 2/3/4/5 (A)	ko04145:Phagosome;ko04510:Focal adhesion;ko04512:ECM-receptor interaction	Thrombospondin-4-B (Precursor) GN=thbs4b OS=Danio rerio (Zebrafish) PE=2 SV=1	T	Signal transduction mechanisms	PREDICTED: thrombospondin-4-B-like [Oreochromis niloticus]
ptprd	225	76	1.38885	0.45739	3.5174e-07	-1.59361	down	[T]	Signal transduction mechanisms	Molecular Function: protein tyrosine phosphatase activity (GO:0004725);; Biological Process: peptidyl-tyrosine dephosphorylation (GO:0035335);;	K06777|0|mze:101484991|receptor-type tyrosine-protein phosphatase delta-like; K06777 receptor-type tyrosine-protein phosphatase delta [EC:3.1.3.48] (A)	--	Receptor-type tyrosine-protein phosphatase F (Precursor) GN=ptprf OS=Danio rerio (Zebrafish) PE=2 SV=1	T	Signal transduction mechanisms	PREDICTED: receptor-type tyrosine-protein phosphatase delta-like isoform X2 [Oreochromis niloticus]
LOC100705013	94	27	0.770087	0.208776	5.26551e-05	-1.78544	down	--	--	--	--	--	--	R	General function prediction only	PREDICTED: zinc finger protein 512B-like [Oreochromis niloticus]
LOC100709115	476	1039	10.8036	26.3391	6.60128e-05	1.07417	up	--	--	--	--	--	Oxysterol-binding protein-related protein 9 GN=osbpl9 OS=Xenopus tropicalis (Western clawed frog) PE=2 SV=1	T	Signal transduction mechanisms	PREDICTED: oxysterol-binding protein-related protein 1-like isoform X1 [Oreochromis niloticus]
glis1	233	13	2.33791	0.130353	0	-4.04459	down	[R]	General function prediction only	--	K09232|0|mze:101483023|zinc finger protein GLIS1-like; K09232 zinc finger protein GLIS1/3 (A)	--	Zinc finger protein GLI1 (Fragment) GN=GLI1 OS=Gallus gallus (Chicken) PE=2 SV=1	R	General function prediction only	PREDICTED: zinc finger protein GLIS1-like isoform X1 [Oreochromis niloticus]
ptprf	137	35	1.73208	0.216381	8.49618e-08	-1.96645	down	[T]	Signal transduction mechanisms	--	K05695|0|mze:101464533|receptor-type tyrosine-protein phosphatase F-like; K05695 receptor-type tyrosine-protein phosphatase F [EC:3.1.3.48] (A)	ko04514:Cell adhesion molecules (CAMs);ko04520:Adherens junction;ko04910:Insulin signaling pathway	Receptor-type tyrosine-protein phosphatase F (Precursor) GN=ptprf OS=Danio rerio (Zebrafish) PE=2 SV=1	T	Signal transduction mechanisms	PREDICTED: receptor-type tyrosine-protein phosphatase F-like isoform X1 [Oreochromis niloticus]
LOC100690306	324	79	7.60228	1.90574	2.1938e-13	-2.06181	down	--	--	Cellular Component: sarcoglycan complex (GO:0016012);; Cellular Component: integral component of membrane (GO:0016021);;	--	--	--	Z	Cytoskeleton	PREDICTED: zeta-sarcoglycan-like [Oreochromis niloticus]
zic3	95	24	1.13699	0.312788	6.13258e-06	-1.95964	down	[R]	General function prediction only	Molecular Function: nucleic acid binding (GO:0003676);; Biological Process: determination of left/right symmetry (GO:0007368);; Biological Process: anterior/posterior axis specification (GO:0009948);; Molecular Function: metal ion binding (GO:0046872);;	K18487|0|mze:101464958|zinc finger protein ZIC 3-like; K18487 zinc finger protein ZIC 3 (A)	--	Zinc finger protein ZIC 3 {ECO:0000250|UniProtKB:O57311} GN=zic3 OS=Xenopus tropicalis (Western clawed frog) PE=2 SV=1	K	Transcription	PREDICTED: zinc finger protein ZIC 3 [Oreochromis niloticus]
ak4	207	44	3.94486	0.967749	2.36666e-12	-2.23976	down	[F]	Nucleotide transport and metabolism	Molecular Function: adenylate kinase activity (GO:0004017);; Molecular Function: ATP binding (GO:0005524);; Biological Process: nucleotide phosphorylation (GO:0046939);;	K00939|2.63374e-163|mze:101485516|GTP:AMP phosphotransferase AK4, mitochondrial-like; K00939 adenylate kinase [EC:2.7.4.3] (A)	ko00230:Purine metabolism	Adenylate kinase 2, mitochondrial {ECO:0000255|HAMAP-Rule:MF_03168} GN=ak2 OS=Xenopus tropicalis (Western clawed frog) PE=2 SV=1	F	Nucleotide transport and metabolism	PREDICTED: GTP:AMP phosphotransferase AK4, mitochondrial-like [Oreochromis niloticus]
LOC100695152	315	684	4.24711	11.3838	0.000165938	1.06533	up	[G]	Carbohydrate transport and metabolism	Molecular Function: hydrolase activity, hydrolyzing O-glycosyl compounds (GO:0004553);; Biological Process: carbohydrate metabolic process (GO:0005975);;	--	--	SITS-binding protein OS=Torpedo californica (Pacific electric ray) PE=1 SV=2	G	Carbohydrate transport and metabolism	PREDICTED: uncharacterized family 31 glucosidase KIAA1161-like isoform X1 [Oreochromis niloticus]
LOC100701785	134	354	22.0104	53.852	4.13023e-06	1.3414	up	--	--	Cellular Component: nucleosome (GO:0000786);; Molecular Function: DNA binding (GO:0003677);; Cellular Component: nucleus (GO:0005634);; Biological Process: nucleosome assembly (GO:0006334);; Molecular Function: protein heterodimerization activity (GO:0046982);;	K11252|2.21939e-59|dan:Dana_GF18984|GF18984 gene product from transcript GF18984-RA; K11252 histone H2B (A)	--	Histone H2B OS=Rhacophorus schlegelii (Japanese gliding frog) PE=1 SV=3	B	Chromatin structure and dynamics	PREDICTED: histone H2B.3-like [Oryzias latipes]
LOC102076990	167	25	10.1285	1.50117	1.95399e-14	-2.70775	down	--	--	--	K17270|5.19094e-112|mze:101482718|myelin-oligodendrocyte glycoprotein-like; K17270 myelin-oligodendrocyte glycoprotein (A)	--	--	R	General function prediction only	PREDICTED: uncharacterized protein LOC102076990, partial [Oreochromis niloticus]
Tilapia_newGene_7282	187	88	9.58827	4.6178	0.00339883	-1.12171	down	--	--	--	--	--	--	--	--	PREDICTED: sialic acid-binding Ig-like lectin 12-like [Pundamilia nyererei]
LOC100694102	281	141	2.15954	1.0401	0.00277167	-1.03528	down	--	--	--	--	--	Protein FAM53A GN=FAM53A OS=Gallus gallus (Chicken) PE=2 SV=2	S	Function unknown	PREDICTED: protein FAM53C-like isoform X1 [Oreochromis niloticus]
LOC100698705	1200	2829	8.45753	20.0996	1.36491e-06	1.18679	up	[Z]	Cytoskeleton	--	--	--	Actin, alpha cardiac muscle 1 (Precursor) GN=actc1 OS=Xenopus laevis (African clawed frog) PE=2 SV=1	Z	Cytoskeleton	PREDICTED: uncharacterized protein LOC101466845 isoform X2 [Maylandia zebra]
zbtb20	301	73	1.29289	0.349901	4.94271e-13	-2.06758	down	[R]	General function prediction only	Molecular Function: nucleic acid binding (GO:0003676);; Cellular Component: nucleus (GO:0005634);; Molecular Function: metal ion binding (GO:0046872);;	K10501|0|mze:101464358|zinc finger and BTB domain-containing protein 20-like; K10501 zinc finger and BTB domain-containing protein 20 (A)	--	Gastrula zinc finger protein XlCGF52.1 (Fragment) OS=Xenopus laevis (African clawed frog) PE=3 SV=1	K	Transcription	PREDICTED: zinc finger and BTB domain-containing protein 20 [Oreochromis niloticus]
LOC102075614	115	6	0.660362	0.0357249	0	-3.9679	down	[U]	Intracellular trafficking, secretion, and vesicular transport	--	--	--	--	R	General function prediction only	PREDICTED: uncharacterized protein LOC102075614 [Oreochromis niloticus]
thbs1b	1306	435	10.7046	3.53854	2.24287e-12	-1.63158	down	--	--	Molecular Function: calcium ion binding (GO:0005509);; Cellular Component: extracellular region (GO:0005576);; Biological Process: cell adhesion (GO:0007155);;	K16857|0|mze:101487021|thrombospondin-1-like; K16857 thrombospondin 1 (A)	ko04115:p53 signaling pathway;ko04145:Phagosome;ko04350:TGF-beta signaling pathway;ko04510:Focal adhesion;ko04512:ECM-receptor interaction	Thrombospondin-1 (Precursor) GN=thbs1 OS=Xenopus laevis (African clawed frog) PE=2 SV=1	W	Extracellular structures	PREDICTED: thrombospondin-1b isoform X1 [Oreochromis niloticus]
LOC100698659	297	134	3.28358	1.54839	0.000154431	-1.18727	down	[HE]	--	Cellular Component: basolateral plasma membrane (GO:0016323);; Molecular Function: oxidoreductase activity, acting on the CH-OH group of donors, NAD or NADP as acceptor (GO:0016616);; Molecular Function: NAD binding (GO:0051287);; Biological Process: oxidation-reduction process (GO:0055114);; Biological Process: synapse assembly involved in innervation (GO:0060386);; Biological Process: clusterin…	K04496|0|mze:101467118|uncharacterized LOC101467118; K04496 C-terminal binding protein (A)	ko04310:Wnt signaling pathway;ko04330:Notch signaling pathway	C-terminal-binding protein 1 GN=ctbp1 OS=Xenopus laevis (African clawed frog) PE=2 SV=1	K	Transcription	PREDICTED: C-terminal-binding protein 2-like isoform X1 [Haplochromis burtoni]
LOC106096417	324	59	3.19393	0.626879	0	-2.47259	down	--	--	Cellular Component: integral component of membrane (GO:0016021);; Biological Process: transmembrane transport (GO:0055085);;	K15107|0|mze:101470609|mitochondrial glutamate carrier 1-like; K15107 solute carrier family 25 (mitochondrial glutamate transporter), member 18/22 (A)	--	Solute carrier family 25 member 48 GN=slc25a48 OS=Danio rerio (Zebrafish) PE=2 SV=1	C	Energy production and conversion	PREDICTED: p53-induced protein with a death domain-like isoform X2 [Oreochromis niloticus]
LOC100692872	913	438	12.4758	7.0943	3.20859e-05	-1.10602	down	--	--	--	--	--	Peroxidasin (Precursor) GN=pxdn OS=Xenopus tropicalis (Western clawed frog) PE=2 SV=1	308	General function prediction only	PREDICTED: hemicentin-1-like isoform X2 [Oreochromis niloticus]
LOC100696074	74	24	0.563613	0.182745	0.00253258	-1.60624	down	--	--	--	--	--	Pleckstrin homology domain-containing family A member 7 GN=plekha7 OS=Danio rerio (Zebrafish) PE=2 SV=2	Z	Cytoskeleton	PREDICTED: pleckstrin homology domain-containing family A member 7 [Oreochromis niloticus]
LOC100690692	36	4	0.66386	0.0376415	0.000468046	-2.76955	down	--	--	Cellular Component: intracellular (GO:0005622);; Molecular Function: zinc ion binding (GO:0008270);;	--	--	Zinc-binding protein A33 OS=Pleurodeles waltl (Iberian ribbed newt) PE=1 SV=2	O	Posttranslational modification, protein turnover, chaperones	PREDICTED: E3 ubiquitin-protein ligase TRIM39-like isoform X1 [Oreochromis niloticus]
LOC102075531	193	91	2.68413	1.40386	0.00306903	-1.11942	down	[R]	General function prediction only	--	--	--	--	R	General function prediction only	PREDICTED: nuclear GTPase SLIP-GC-like isoform X1 [Oreochromis niloticus]
LOC100693481	40	143	2.57682	8.84149	2.536e-06	1.74723	up	--	--	Biological Process: immune system process (GO:0002376);; Cellular Component: membrane (GO:0016020);;	K06752|3.6831e-124|mze:101484336|h-2 class II histocompatibility antigen, E-U alpha chain-like; K06752 major histocompatibility complex, class II (A)	ko04145:Phagosome;ko04514:Cell adhesion molecules (CAMs);ko04672:Intestinal immune network for IgA production;ko05168:Herpes simplex infection	Beta-2-microglobulin (Precursor) GN=b2m OS=Paralichthys olivaceus (Bastard halibut) PE=3 SV=1	--	--	PREDICTED: SLA class II histocompatibility antigen, DQ haplotype D alpha chain-like [Oreochromis niloticus]
LOC100690862	196	62	1.51487	0.453674	2.21309e-07	-1.68266	down	--	--	Cellular Component: Golgi membrane (GO:0000139);; Biological Process: protein glycosylation (GO:0006486);; Cellular Component: integral component of membrane (GO:0016021);; Molecular Function: transferase activity, transferring glycosyl groups (GO:0016757);;	K09668|0|tru:101071280|glycosyltransferase-like protein LARGE2-like; K09668 glycosyltransferase-like protein LARGE (A)	--	Beta-1,3-glucuronyltransferase LARGE2 {ECO:0000305} OS=Danio rerio (Zebrafish) PE=2 SV=1	G	Carbohydrate transport and metabolism	PREDICTED: glycosyltransferase-like protein LARGE2-like isoform X1 [Oreochromis niloticus]
Tilapia_newGene_8916	959	435	39.3956	20.0728	3.85577e-06	-1.18669	down	--	--	--	--	--	--	S	Function unknown	transposase [Rana pipiens]
iffo1	546	240	3.82866	1.75663	5.99636e-06	-1.22932	down	--	--	--	--	--	--	S	Function unknown	PREDICTED: intermediate filament family orphan 1-like [Oreochromis niloticus]
LOC102080793	492	252	13.311	5.73959	0.000926313	-1.00966	down	--	--	--	--	--	--	187	Function unknown	PREDICTED: uncharacterized protein LOC102080793 isoform X1 [Oreochromis niloticus]
LOC100691448	150	318	6.65612	17.9798	0.0025637	1.02662	up	--	--	Molecular Function: sequence-specific DNA binding transcription factor activity (GO:0003700);; Cellular Component: nucleus (GO:0005634);; Biological Process: regulation of transcription, DNA-templated (GO:0006355);; Biological Process: multicellular organismal development (GO:0007275);; Molecular Function: sequence-specific DNA binding (GO:0043565);; Molecular Function: metal ion binding (GO:0046…	K09236|0|mze:101468472|teashirt homolog 1-like; K09236 teashirt (A)	--	Teashirt homolog 1 GN=tshz1 OS=Danio rerio (Zebrafish) PE=2 SV=1	R	General function prediction only	PREDICTED: teashirt homolog 1-like isoform X1 [Oreochromis niloticus]
wsb2	886	432	20.2897	9.8777	5.9252e-05	-1.08261	down	[T]	Signal transduction mechanisms	Biological Process: protein ubiquitination (GO:0016567);; Biological Process: intracellular signal transduction (GO:0035556);;	K10342|0|mze:101484370|WD repeat and SOCS box-containing protein 2-like; K10342 WD repeat and SOCS box-containing protein 2 (A)	--	WD repeat and SOCS box-containing protein 1 GN=wsb1 OS=Danio rerio (Zebrafish) PE=2 SV=1	R	General function prediction only	PREDICTED: WD repeat and SOCS box-containing protein 2-like isoform X1 [Oreochromis niloticus]
LOC100708316	21	175	1.32882	11.3795	7.77156e-16	2.91404	up	--	--	--	K06593|5.37858e-44|mze:101475280|poliovirus receptor-related protein 4-like; K06593 poliovirus receptor-related 4 (A)	ko04520:Adherens junction	--	T	Signal transduction mechanisms	PREDICTED: uncharacterized protein LOC100708316 [Oreochromis niloticus]
reep5	413	182	17.4733	9.65244	1.89603e-05	-1.22381	down	[U]	Intracellular trafficking, secretion, and vesicular transport	--	K17279|4.6144e-105|mze:101476767|receptor expression-enhancing protein 5-like; K17279 receptor expression-enhancing protein 5/6 (A)	--	Receptor expression-enhancing protein 6 OS=Danio rerio (Zebrafish) PE=2 SV=1	U	Intracellular trafficking, secretion, and vesicular transport	PREDICTED: receptor expression-enhancing protein 5-like [Oreochromis niloticus]
LOC100696340	823	370	11.5727	5.31737	3.91099e-06	-1.19895	down	--	--	--	--	--	--	R	General function prediction only	PREDICTED: nucleobindin-2-like isoform X1 [Oreochromis niloticus]
LOC100707093	45	10	1.17965	0.269432	0.00391217	-2.04314	down	--	--	--	--	--	--	S	Function unknown	PREDICTED: protein FAM212A-like isoform X1 [Oreochromis niloticus]
Tilapia_newGene_2321	139	60	3.96505	1.95366	0.0028533	-1.23785	down	--	--	--	--	--	--	R	General function prediction only	PREDICTED: arrestin domain-containing protein 3-like isoform X2 [Haplochromis burtoni]
prg4	495	1343	8.9183	23.0136	8.35706e-09	1.38762	up	--	--	Molecular Function: scavenger receptor activity (GO:0005044);; Biological Process: immune response (GO:0006955);; Molecular Function: polysaccharide binding (GO:0030247);; Molecular Function: metal ion binding (GO:0046872);;	--	--	Poly(U)-specific endoribonuclease (Precursor) GN=endou OS=Paralichthys olivaceus (Bastard halibut) PE=2 SV=1	W	Extracellular structures	PREDICTED: proteoglycan 4-like isoform X1 [Oreochromis niloticus]
LOC100712153	177	50	1.41304	0.348136	3.76163e-08	-1.8379	down	--	--	--	K10408|0|xtr:100488102|dynein heavy chain 5, axonemal-like; K10408 dynein heavy chain, axonemal (A)	--	--	Z	Cytoskeleton	PREDICTED: dynein heavy chain 5, axonemal-like, partial [Oreochromis niloticus]
gda	154	1	2.59586	0.0274334	0	-5.89085	down	[FR]	--	Biological Process: guanine catabolic process (GO:0006147);; Molecular Function: zinc ion binding (GO:0008270);; Molecular Function: guanine deaminase activity (GO:0008892);;	K01487|0|mze:101475309|guanine deaminase-like; K01487 guanine deaminase [EC:3.5.4.3] (A)	ko00230:Purine metabolism	--	F	Nucleotide transport and metabolism	PREDICTED: guanine deaminase-like [Oreochromis niloticus]
sgcd	752	374	14.9454	13.2745	0.000153877	-1.05363	down	--	--	Biological Process: determination of left/right symmetry (GO:0007368);; Biological Process: somatic muscle development (GO:0007525);; Cellular Component: sarcoglycan complex (GO:0016012);; Cellular Component: integral component of membrane (GO:0016021);; Cellular Component: sarcolemma (GO:0042383);; Biological Process: cardiac muscle tissue development (GO:0048738);; Biological Process: swim blad…	K12563|9.86162e-179|mze:101484604|delta-sarcoglycan-like; K12563 delta-sarcoglycan (A)	--	--	Z	Cytoskeleton	PREDICTED: delta-sarcoglycan-like isoform X2 [Oreochromis niloticus]
mmp28	326	105	5.21625	1.74735	3.20665e-09	-1.66778	down	--	--	Molecular Function: metalloendopeptidase activity (GO:0004222);; Molecular Function: calcium ion binding (GO:0005509);; Biological Process: proteolysis (GO:0006508);; Molecular Function: zinc ion binding (GO:0008270);; Cellular Component: extracellular matrix (GO:0031012);;	K08006|0|mze:101480899|matrix metalloproteinase-28-like; K08006 matrix metalloproteinase-28 (epilysin) [EC:3.4.24.-] (A)	--	Stromelysin-3 (Precursor) GN=mmp11 OS=Xenopus laevis (African clawed frog) PE=1 SV=1	W	Extracellular structures	PREDICTED: matrix metalloproteinase-28-like isoform X2 [Oreochromis niloticus]
lrrc31	60	175	1.3281	3.79113	3.25773e-05	1.46973	up	--	--	--	--	--	--	S	Function unknown	PREDICTED: leucine-rich repeat-containing protein 31-like isoform X2 [Maylandia zebra]
gpr180	16	68	0.220155	0.943274	0.000377709	1.93187	up	--	--	Biological Process: G-protein coupled receptor signaling pathway (GO:0007186);; Biological Process: response to pheromone (GO:0019236);;	--	--	Integral membrane protein GPR180 (Precursor) GN=gpr180 OS=Xenopus laevis (African clawed frog) PE=2 SV=1	T	Signal transduction mechanisms	PREDICTED: integral membrane protein GPR180-like [Oreochromis niloticus]
granulin	54	15	2.66815	1.1855	0.00576733	-1.78481	down	--	--	--	--	--	Granulin-1 OS=Cyprinus carpio (Common carp) PE=1 SV=1	T	Signal transduction mechanisms	progranulin precursor [Oreochromis niloticus]
emp2	677	181	11.6613	3.56539	2.44249e-15	-1.94245	down	--	--	Cellular Component: integral component of membrane (GO:0016021);;	--	--	Epithelial membrane protein 2 OS=Danio rerio (Zebrafish) PE=2 SV=2	R	General function prediction only	PREDICTED: epithelial membrane protein 2-like [Oreochromis niloticus]
LOC102080174	383	1522	15.9756	75.577	0	1.93659	up	--	--	--	--	--	Nectin-3-like protein (Precursor) GN=pvrl3l OS=Danio rerio (Zebrafish) PE=2 SV=2	T	Signal transduction mechanisms	PREDICTED: poliovirus receptor-related protein 4-like [Oreochromis niloticus]
LOC100702412	0	59	0	1.6873	7.29561e-12	5.14611	up	[Q]	Secondary metabolites biosynthesis, transport and catabolism	Cellular Component: cytoplasm (GO:0005737);; Cellular Component: plasma membrane (GO:0005886);; Biological Process: visual perception (GO:0007601);; Molecular Function: metal ion binding (GO:0046872);; Biological Process: response to stimulus (GO:0050896);; Molecular Function: all-trans-retinyl-palmitate hydrolase, 11-cis retinol forming activity (GO:0052884);; Molecular Function: all-trans-retin…	K11158|0|mze:101485028|retinoid isomerohydrolase-like; K11158 retinoid isomerohydrolase [EC:3.1.1.64] (A)	ko00830:Retinol metabolism	Retinoid isomerohydrolase GN=rpe65a OS=Danio rerio (Zebrafish) PE=2 SV=1	Q	Secondary metabolites biosynthesis, transport and catabolism	PREDICTED: retinoid isomerohydrolase-like [Oreochromis niloticus]
LOC100697103	74	10	1.31419	0.172467	4.47919e-08	-2.74052	down	[I]	Lipid transport and metabolism	Biological Process: cell adhesion (GO:0007155);; Cellular Component: membrane (GO:0016020);;	K07378|0|mze:101487455|neuroligin-3-like; K07378 neuroligin (A)	ko04514:Cell adhesion molecules (CAMs)	Acetylcholinesterase (Precursor) GN=ACHE OS=Bungarus fasciatus (Banded krait) PE=1 SV=2	R	General function prediction only	PREDICTED: neuroligin-3-like isoform X1 [Maylandia zebra]
kank3	1340	623	13.1998	5.96251	5.6077e-06	-1.1521	down	[R]	General function prediction only	--	--	--	Ankyrin repeat domain-containing protein 29 GN=ankrd29 OS=Danio rerio (Zebrafish) PE=2 SV=1	R	General function prediction only	PREDICTED: KN motif and ankyrin repeat domain-containing protein 3-like isoform X2 [Oreochromis niloticus]
cytip	7	44	0.195755	1.14281	0.0010459	2.35137	up	--	--	--	--	--	SH3 and multiple ankyrin repeat domains protein 2 GN=shank2 OS=Xenopus laevis (African clawed frog) PE=2 SV=1	S	Function unknown	PREDICTED: cytohesin-interacting protein-like isoform X1 [Oreochromis niloticus]
LOC102076326	128	12	0.64273	0.0674318	1.66533e-15	-3.29027	down	[P]	Inorganic ion transport and metabolism	Molecular Function: voltage-gated potassium channel activity (GO:0005249);; Cellular Component: voltage-gated potassium channel complex (GO:0008076);; Molecular Function: potassium ion binding (GO:0030955);; Biological Process: regulation of ion transmembrane transport (GO:0034765);; Biological Process: protein homooligomerization (GO:0051260);; Biological Process: potassium ion transmembrane tra…	K04877|0|mze:101486627|potassium voltage-gated channel subfamily A member 4-like; K04877 potassium voltage-gated channel Shaker-related subfamily A member 4 (A)	--	Potassium voltage-gated channel subfamily A member 2 GN=kcna2 OS=Xenopus laevis (African clawed frog) PE=2 SV=2	P	Inorganic ion transport and metabolism	PREDICTED: potassium voltage-gated channel subfamily A member 4-like [Oreochromis niloticus]
LOC100712094	251	10	13.7941	0.574096	0	-4.48016	down	--	--	Molecular Function: retinoic acid binding (GO:0001972);; Molecular Function: prostaglandin-D synthase activity (GO:0004667);; Molecular Function: transporter activity (GO:0005215);; Cellular Component: extracellular region (GO:0005576);; Biological Process: lipid metabolic process (GO:0006629);; Biological Process: transport (GO:0006810);; Molecular Function: small molecule binding (GO:0036094);;	K01830|2.13783e-110|mze:101469534|lipocalin-like; K01830 prostaglandin-H2 D-isomerase [EC:5.3.99.2] (A)	ko00590:Arachidonic acid metabolism	Lipocalin (Precursor) OS=Bufo marinus (Giant toad) PE=1 SV=1	M	Cell wall/membrane/envelope biogenesis	PREDICTED: lipocalin-like [Oreochromis niloticus]
nptx1	110	42	2.04236	0.77934	0.00144147	-1.40224	down	--	--	--	--	--	Pentraxin fusion protein (Precursor) GN=pxn1 OS=Xenopus laevis (African clawed frog) PE=2 SV=1	R	General function prediction only	PREDICTED: neuronal pentraxin-1-like [Oreochromis niloticus]
gadd45b	167	57	5.98456	2.01314	6.13765e-06	-1.57166	down	--	--	Biological Process: somitogenesis (GO:0001756);; Cellular Component: nucleus (GO:0005634);; Biological Process: response to stress (GO:0006950);; Biological Process: response to cadmium ion (GO:0046686);; Biological Process: response to methylmercury (GO:0051597);; Biological Process: regulation of cell cycle (GO:0051726);;	K04402|4.94841e-110|mze:101486438|growth arrest and DNA damage-inducible protein GADD45 beta-like; K04402 growth arrest and DNA-damage-inducible protein (A)	ko04010:MAPK signaling pathway;ko04068:FoxO signaling pathway;ko04110:Cell cycle;ko04115:p53 signaling pathway	--	D	Cell cycle control, cell division, chromosome partitioning	PREDICTED: growth arrest and DNA damage-inducible protein GADD45 beta-like [Oreochromis niloticus]
wbscr17	217	9	4.43586	0.119512	0	-4.40038	down	--	--	Cellular Component: Golgi apparatus (GO:0005794);; Biological Process: protein glycosylation (GO:0006486);; Cellular Component: integral component of membrane (GO:0016021);; Molecular Function: transferase activity, transferring glycosyl groups (GO:0016757);;	K00710|0|mze:101478461|putative polypeptide N-acetylgalactosaminyltransferase-like protein 3-like; K00710 polypeptide N-acetylgalactosaminyltransferase [EC:2.4.1.41] (A)	ko00512:Mucin type O-Glycan biosynthesis	Polypeptide N-acetylgalactosaminyltransferase 11 GN=galnt11 OS=Xenopus tropicalis (Western clawed frog) PE=1 SV=2	O	Posttranslational modification, protein turnover, chaperones	PREDICTED: putative polypeptide N-acetylgalactosaminyltransferase-like protein 3-like isoform X1 [Oreochromis niloticus]
LOC100704820	3	51	0.106365	0.513758	2.5504e-07	3.4514	up	--	--	--	--	--	Zinc-binding protein A33 OS=Pleurodeles waltl (Iberian ribbed newt) PE=1 SV=2	O	Posttranslational modification, protein turnover, chaperones	PREDICTED: E3 ubiquitin-protein ligase TRIM21-like isoform X1 [Oreochromis niloticus]
Tilapia_newGene_4472	178	80	9.60944	2.2112	0.00166877	-1.18593	down	--	--	--	--	--	Transferrin receptor protein 1 GN=TFRC OS=Gallus gallus (Chicken) PE=2 SV=2	OP	-	PREDICTED: inactive N-acetylated-alpha-linked acidic dipeptidase-like protein 2-like isoform X1 [Oreochromis niloticus]
vegfb	128	56	0.873114	0.407356	0.00570263	-1.21705	down	--	--	Molecular Function: growth factor activity (GO:0008083);; Cellular Component: membrane (GO:0016020);; Biological Process: positive regulation of cell division (GO:0051781);;	K05448|4.58276e-124|mze:101467969|vascular endothelial growth factor A-like; K05448 vascular endothelial growth factor A (A)	ko04060:Cytokine-cytokine receptor interaction;ko04150:mTOR signaling pathway;ko04370:VEGF signaling pathway;ko04510:Focal adhesion	Vascular endothelial growth factor A (Precursor) OS=Vipera ammodytes ammodytes (Western sand viper) PE=2 SV=1	T	Signal transduction mechanisms	PREDICTED: vascular endothelial growth factor A-A-like [Oreochromis niloticus]
LOC100699813	77	27	2.07041	0.746177	0.00512672	-1.50315	down	--	--	Molecular Function: nucleic acid binding (GO:0003676);; Molecular Function: zinc ion binding (GO:0008270);;	--	--	--	R	General function prediction only	PREDICTED: zinc finger CCHC domain-containing protein 24-like [Oreochromis niloticus]
LOC100701194	144	321	3.5555	8.22605	0.000716591	1.09833	up	--	--	Molecular Function: ionotropic glutamate receptor activity (GO:0004970);; Molecular Function: extracellular-glutamate-gated ion channel activity (GO:0005234);; Cellular Component: plasma membrane (GO:0005886);; Biological Process: ion transport (GO:0006811);; Cellular Component: integral component of membrane (GO:0016021);; Cellular Component: cell junction (GO:0030054);; Biological Process: iono…	--	--	Probable glutamate receptor (Precursor) GN=KBP OS=Gallus gallus (Chicken) PE=1 SV=1	T	Signal transduction mechanisms	PREDICTED: probable glutamate receptor-like [Oreochromis niloticus]
ube2ql1	294	103	2.94314	1.05847	1.11769e-07	-1.54682	down	[O]	Posttranslational modification, protein turnover, chaperones	Molecular Function: acid-amino acid ligase activity (GO:0016881);;	K10582|0|mze:101476765|ubiquitin-conjugating enzyme E2Q-like protein 1-like; K10582 ubiquitin-conjugating enzyme E2 Q [EC:6.3.2.19] (A)	ko04120:Ubiquitin mediated proteolysis	--	O	Posttranslational modification, protein turnover, chaperones	PREDICTED: ubiquitin-conjugating enzyme E2Q-like protein 1-like [Oreochromis niloticus]
LOC100711712	266	123	5.65376	2.13191	0.000472998	-1.15111	down	--	--	--	K17345|0|tru:101073142|tetraspanin-5-like; K17345 tetraspanin-5 (A)	--	Tetraspanin-33 GN=tspan33 OS=Danio rerio (Zebrafish) PE=2 SV=1	R	General function prediction only	PREDICTED: tetraspanin-5-like isoform X1 [Larimichthys crocea]
pappa	266	102	1.40374	0.618812	3.28416e-06	-1.41712	down	--	--	Molecular Function: metallopeptidase activity (GO:0008237);; Biological Process: embryo development (GO:0009790);; Cellular Component: membrane (GO:0016020);; Biological Process: cell differentiation (GO:0030154);;	K07762|0|mze:101485105|pappalysin-1-like; K07762 pappalysin-1 [EC:3.4.24.79] (A)	--	--	W	Extracellular structures	PREDICTED: pappalysin-1-like [Oreochromis niloticus]
pla2g12b	0	572	0	14.886	0	8.38633	up	--	--	Molecular Function: phospholipase A2 activity (GO:0004623);; Molecular Function: calcium ion binding (GO:0005509);; Cellular Component: extracellular region (GO:0005576);; Biological Process: lipid catabolic process (GO:0016042);;	K01047|1.07611e-180|mze:101476337|group XIIB secretory phospholipase A2-like protein-like; K01047 secretory phospholipase A2 [EC:3.1.1.4] (A)	ko00564:Glycerophospholipid metabolism;ko00565:Ether lipid metabolism;ko00590:Arachidonic acid metabolism;ko00591:Linoleic acid metabolism;ko00592:alpha-Linolenic acid metabolism;ko04270:Vascular smooth muscle contraction	--	I	Lipid transport and metabolism	PREDICTED: group XIIB secretory phospholipase A2-like protein-like isoform X2 [Oreochromis niloticus]
LOC100708199	46	123	0.849154	2.39652	0.00208525	1.33852	up	--	--	--	--	--	Contactin-2 (Precursor) GN=CNTN2 OS=Gallus gallus (Chicken) PE=1 SV=1	T	Signal transduction mechanisms	PREDICTED: B-cell receptor CD22-like [Oreochromis niloticus]
clg3h4orf48	280	144	12.6167	7.02726	0.00497314	-1.00015	down	--	--	Cellular Component: extracellular region (GO:0005576);;	--	--	Neuropeptide-like protein C4orf48 homolog (Precursor) OS=Salmo salar (Atlantic salmon) PE=3 SV=1	S	Function unknown	PREDICTED: neuropeptide-like protein C4orf48 homolog [Neolamprologus brichardi]
LOC100705952	216	108	6.38275	3.38501	0.00659019	-1.03766	down	--	--	Biological Process: neurotransmitter transport (GO:0006836);; Molecular Function: syntaxin binding (GO:0019905);;	K15294|1.60638e-49|mze:101483036|complexin-1-like; K15294 complexin-1/2 (A)	--	Complexin-1 OS=Narke japonica (Japanese electric ray) PE=1 SV=1	S	Function unknown	PREDICTED: complexin-1-like [Stegastes partitus]
LOC102079889	541	1126	17.2395	31.6854	0.000295336	1.00593	up	[R]	General function prediction only	--	--	--	Oocyte zinc finger protein XlCOF8.4 (Fragment) OS=Xenopus laevis (African clawed frog) PE=2 SV=1	R	General function prediction only	PREDICTED: zinc finger protein 235-like isoform X1 [Oreochromis niloticus]
LOC100708131	236	19	4.14299	0.295725	0	-3.56952	down	[T]	Signal transduction mechanisms	Molecular Function: guanylate cyclase activity (GO:0004383);; Molecular Function: protein kinase activity (GO:0004672);; Molecular Function: ATP binding (GO:0005524);; Biological Process: cGMP biosynthetic process (GO:0006182);; Biological Process: protein phosphorylation (GO:0006468);; Biological Process: transport (GO:0006810);; Biological Process: intracellular signal transduction (GO:0035556)…	K12321|0|ola:100192404|olgc3; membrane guanylyl cyclase (EC:4.6.1.2); K12321 guanylate cyclase 2D/E/F [EC:4.6.1.2] (A)	ko00230:Purine metabolism;ko04744:Phototransduction	Atrial natriuretic peptide receptor 2 (Precursor) GN=npr2 OS=Anguilla japonica (Japanese eel) PE=2 SV=1	T	Signal transduction mechanisms	PREDICTED: retinal guanylyl cyclase 2-like [Oreochromis niloticus]
LOC100703546	114	42	1.24016	0.453306	0.000609898	-1.45302	down	--	--	--	--	--	Rho GTPase-activating protein 21-B GN=arhgap21-b OS=Xenopus laevis (African clawed frog) PE=2 SV=1	T	Signal transduction mechanisms	PREDICTED: stAR-related lipid transfer protein 13-like isoform X2 [Oreochromis niloticus]
LOC100700481	335	975	2.7549	14.1194	1.02317e-09	1.4873	up	--	--	--	K06237|0|mze:101480533|collagen alpha-5(IV) chain-like; K06237 collagen, type IV, alpha (A)	ko04510:Focal adhesion;ko04512:ECM-receptor interaction	Collagen alpha-1(XXI) chain (Precursor) GN=col21a1 OS=Xenopus laevis (African clawed frog) PE=2 SV=1	W	Extracellular structures	PREDICTED: collagen alpha-5(IV) chain-like [Oreochromis niloticus]
LOC100707189	16	89	0.945665	5.04255	4.61678e-07	2.31174	up	[QR]	--	Molecular Function: thiopurine S-methyltransferase activity (GO:0008119);; Biological Process: methylation (GO:0032259);;	K00569|1.7244e-140|ola:101168968|probable thiopurine S-methyltransferase-like; K00569 thiopurine S-methyltransferase [EC:2.1.1.67] (A)	ko00983:Drug metabolism - other enzymes	Probable thiopurine S-methyltransferase GN=tpmt OS=Danio rerio (Zebrafish) PE=2 SV=1	R	General function prediction only	PREDICTED: probable thiopurine S-methyltransferase-like isoform X1 [Oreochromis niloticus]
LOC100698500	740	359	4.90215	2.55993	7.04058e-05	-1.08925	down	--	--	Molecular Function: GABA-A receptor activity (GO:0004890);; Molecular Function: extracellular ligand-gated ion channel activity (GO:0005230);; Cellular Component: plasma membrane (GO:0005886);; Biological Process: ion transport (GO:0006811);; Cellular Component: integral component of membrane (GO:0016021);; Cellular Component: cell junction (GO:0030054);; Cellular Component: postsynaptic membrane…	K05175|0|mze:101472157|gamma-aminobutyric acid receptor subunit alpha-3-like; K05175 gamma-aminobutyric acid receptor subunit alpha (A)	ko04080:Neuroactive ligand-receptor interaction	Gamma-aminobutyric acid receptor subunit alpha-1 (Precursor) GN=GABRA1 OS=Gallus gallus (Chicken) PE=2 SV=1	T	Signal transduction mechanisms	PREDICTED: gamma-aminobutyric acid receptor subunit alpha-3-like isoform X1 [Oreochromis niloticus]
ndufb9	1905	4368	123.655	257.723	3.9369e-06	1.14714	up	--	--	--	K03965|2.7643e-124|xma:102224495|NADH dehydrogenase [ubiquinone] 1 beta subcomplex subunit 9-like; K03965 NADH dehydrogenase (ubiquinone) 1 beta subcomplex subunit 9 (A)	ko00190:Oxidative phosphorylation	--	C	Energy production and conversion	PREDICTED: NADH dehydrogenase [ubiquinone] 1 beta subcomplex subunit 9-like [Oreochromis niloticus]
susd2	110	0	1.32008	0	0	-6.07442	down	--	--	Molecular Function: scavenger receptor activity (GO:0005044);; Biological Process: immune response (GO:0006955);; Molecular Function: polysaccharide binding (GO:0030247);;	--	--	Kielin/chordin-like protein (Precursor) GN=kcp OS=Xenopus laevis (African clawed frog) PE=2 SV=1	W	Extracellular structures	PREDICTED: sushi domain-containing protein 2-like [Oreochromis niloticus]
LOC100706369	64	13	0.462786	0.101207	3.80589e-05	-2.20706	down	[P]	Inorganic ion transport and metabolism	--	K15122|0|mze:101475171|solute carrier family 41 member 1-like; K15122 solute carrier family 41 (A)	--	Solute carrier family 41 member 2 GN=slc41a2 OS=Xenopus laevis (African clawed frog) PE=2 SV=1	P	Inorganic ion transport and metabolism	PREDICTED: solute carrier family 41 member 1-like isoform X1 [Oreochromis niloticus]
unc45b	157	59	5.34663	1.76791	8.38412e-05	-1.43515	down	[R]	General function prediction only	Molecular Function: protein binding (GO:0005515);; Biological Process: skeletal muscle tissue development (GO:0007519);; Cellular Component: Z disc (GO:0030018);; Biological Process: myofibril assembly (GO:0030239);; Cellular Component: perinuclear region of cytoplasm (GO:0048471);; Biological Process: cardiac muscle tissue development (GO:0048738);;	--	--	Protein unc-45 homolog B {ECO:0000250|UniProtKB:Q8IWX7, ECO:0000312|EMBL:AAH76400.1} GN=si:ch211-204d2.1 OS=Danio rerio (Zebrafish) PE=1 SV=2	O	Posttranslational modification, protein turnover, chaperones	PREDICTED: protein unc-45 homolog B-like isoform X1 [Oreochromis niloticus]
LOC102082471	140	27	2.99133	0.58004	1.62281e-10	-2.3519	down	--	--	--	--	--	--	--	--	PREDICTED: uncharacterized protein LOC102082471 [Oreochromis niloticus]
Tilapia_newGene_2088	38	102	1.24714	4.70255	0.00635745	1.33762	up	--	--	--	--	--	--	--	--	PREDICTED: high mobility group protein B2-like isoform X1 [Astyanax mexicanus]
LOC100711122	232	82	6.55074	2.11656	9.37263e-07	-1.5302	down	--	--	--	--	--	Rab9 effector protein with kelch motifs GN=RABEPK OS=Gallus gallus (Chicken) PE=2 SV=1	R	General function prediction only	PREDICTED: kelch domain-containing protein 1-like isoform X1 [Oreochromis niloticus]
LOC100709627	300	138	2.75483	1.20466	0.000246564	-1.15978	down	--	--	--	K17551|0|mze:101474871|neurabin-2-like; K17551 neurabin (A)	--	Protein scribble homolog GN=scrib OS=Danio rerio (Zebrafish) PE=1 SV=1	T	Signal transduction mechanisms	PREDICTED: neurabin-2-like isoform X2 [Oreochromis niloticus]
pck2	1000	393	13.1067	5.16932	1.13183e-08	-1.39286	down	[C]	Energy production and conversion	Molecular Function: phosphoenolpyruvate carboxykinase (GTP) activity (GO:0004613);; Molecular Function: GTP binding (GO:0005525);; Biological Process: gluconeogenesis (GO:0006094);;	K01596|0|mze:101468054|phosphoenolpyruvate carboxykinase [GTP], mitochondrial-like; K01596 phosphoenolpyruvate carboxykinase (GTP) [EC:4.1.1.32] (A)	ko00010:Glycolysis / Gluconeogenesis;ko00020:Citrate cycle (TCA cycle);ko00620:Pyruvate metabolism;ko03320:PPAR signaling pathway;ko04068:FoxO signaling pathway;ko04910:Insulin signaling pathway;ko04920:Adipocytokine signaling pathway	Phosphoenolpyruvate carboxykinase, cytosolic [GTP] GN=PCK1 OS=Gallus gallus (Chicken) PE=2 SV=1	C	Energy production and conversion	PREDICTED: phosphoenolpyruvate carboxykinase [GTP], mitochondrial [Oreochromis niloticus]
actc1	99	39	3.27071	1.17071	0.00476807	-1.35518	down	[Z]	Cytoskeleton	Molecular Function: ATP binding (GO:0005524);; Biological Process: ATP catabolic process (GO:0006200);; Biological Process: apoptotic process (GO:0006915);; Molecular Function: ATPase activity (GO:0016887);; Molecular Function: myosin binding (GO:0017022);; Biological Process: skeletal muscle thin filament assembly (GO:0030240);; Cellular Component: I band (GO:0031674);; Biological Process: actin…	K12314|0|mze:101481306|actin, alpha cardiac muscle 1-like; K12314 actin, alpha cardiac muscle (A)	ko04260:Cardiac muscle contraction;ko04261:Adrenergic signaling in cardiomyocytes	Actin, alpha cardiac muscle 1 {ECO:0000250|UniProtKB:P04751, ECO:0000312|EMBL:AAH62494.1} (Precursor) OS=Xenopus tropicalis (Western clawed frog) PE=2 SV=1	Z	Cytoskeleton	PREDICTED: actin, alpha cardiac muscle 1-like isoform 1 [Oreochromis niloticus]
LOC100710983	447	175	10.6487	6.37708	2.76799e-07	-1.39355	down	[E]	Amino acid transport and metabolism	--	--	--	--	O	Posttranslational modification, protein turnover, chaperones	PREDICTED: dipeptidyl aminopeptidase-like protein 6-like isoform X1 [Oreochromis niloticus]
sln	0	433	0	19.1864	0	7.98606	up	--	--	--	--	--	--	S	Function unknown	PREDICTED: sarcolipin-like [Oreochromis niloticus]
LOC100692868	72	22	0.615727	0.222827	0.0014876	-1.6844	down	--	--	--	K05181|0|mze:101487468|gamma-aminobutyric acid receptor subunit beta-3-like; K05181 gamma-aminobutyric acid receptor subunit beta (A)	ko04080:Neuroactive ligand-receptor interaction	Gamma-aminobutyric acid receptor subunit beta-3 (Precursor) GN=GABRB3 OS=Gallus gallus (Chicken) PE=2 SV=1	T	Signal transduction mechanisms	PREDICTED: gamma-aminobutyric acid receptor subunit beta-3-like isoform X4 [Oreochromis niloticus]
drc1	69	4	1.17627	0.0780383	8.41606e-11	-3.67747	down	--	--	Cellular Component: cell projection (GO:0042995);; Cellular Component: intracellular organelle (GO:0043229);;	--	--	Dynein regulatory complex protein 1 GN=drc1 OS=Xenopus laevis (African clawed frog) PE=2 SV=1	S	Function unknown	PREDICTED: dynein regulatory complex protein 1-like [Oreochromis niloticus]
fbrsl1	331	144	2.96539	1.19831	3.43974e-05	-1.24025	down	--	--	--	--	--	--	R	General function prediction only	PREDICTED: autism susceptibility gene 2 protein-like isoform X1 [Oreochromis niloticus]
LOC100701567	276	138	1.29319	0.615248	0.0027122	-1.04018	down	--	--	--	K06236|0|mze:101480286|collagen alpha-1(XI) chain-like; K06236 collagen, type I/II/III/V/XI/XXIV/XXVII, alpha (A)	ko04510:Focal adhesion;ko04512:ECM-receptor interaction	Collagen alpha-1(II) chain (Precursor) GN=col2a1 OS=Xenopus tropicalis (Western clawed frog) PE=2 SV=1	W	Extracellular structures	PREDICTED: collagen alpha-1(V) chain-like [Oreochromis niloticus]
LOC100704832	109	43	1.21138	0.508114	0.00262236	-1.35663	down	[GEPR]	--	Cellular Component: integral component of membrane (GO:0016021);; Biological Process: transmembrane transport (GO:0055085);;	K08183|0|mze:101472232|monocarboxylate transporter 7-like; K08183 MFS transporter, MCP family, solute carrier family 16 (monocarboxylic acid transporters), member 6 (A)	--	Monocarboxylate transporter 9 GN=SLC16A9 OS=Gallus gallus (Chicken) PE=2 SV=1	G	Carbohydrate transport and metabolism	PREDICTED: monocarboxylate transporter 7-like isoform X1 [Oreochromis niloticus]
agap3	126	50	1.01566	0.370901	0.0011249	-1.35298	down	[U]	Intracellular trafficking, secretion, and vesicular transport	Molecular Function: GTP binding (GO:0005525);; Molecular Function: phospholipid binding (GO:0005543);; Cellular Component: intracellular (GO:0005622);; Molecular Function: ARF GTPase activator activity (GO:0008060);; Molecular Function: zinc ion binding (GO:0008270);; Biological Process: regulation of ARF GTPase activity (GO:0032312);;	K12491|0|mze:101466495|arf-GAP with GTPase, ANK repeat and PH domain-containing protein 3-like; K12491 Arf-GAP with GTPase, ANK repeat and PH domain-containing protein 1/3 (A)	ko04144:Endocytosis	Arf-GAP with GTPase, ANK repeat and PH domain-containing protein 1 GN=agap1 OS=Xenopus laevis (African clawed frog) PE=2 SV=1	T	Signal transduction mechanisms	PREDICTED: arf-GAP with GTPase, ANK repeat and PH domain-containing protein 3 isoform X2 [Oreochromis niloticus]
LOC100692859	25	1	1.2094	0.0765101	0.00187117	-3.34506	down	--	--	--	--	--	Collagen alpha-1(VIII) chain (Precursor) GN=COL8A1 OS=Gallus gallus (Chicken) PE=3 SV=1	R	General function prediction only	PREDICTED: complement C1q tumor necrosis factor-related protein 3-like [Oreochromis niloticus]
dhh	1818	921	30.6436	16.5664	0.000104867	-1.02907	down	--	--	Cellular Component: extracellular region (GO:0005576);; Cellular Component: plasma membrane (GO:0005886);; Biological Process: proteolysis (GO:0006508);; Biological Process: cell-cell signaling (GO:0007267);; Biological Process: multicellular organismal development (GO:0007275);; Molecular Function: peptidase activity (GO:0008233);; Biological Process: intein-mediated protein splicing (GO:0016539…	--	--	Desert hedgehog protein A C-product (Precursor) GN=dhh-a OS=Xenopus laevis (African clawed frog) PE=2 SV=1	T	Signal transduction mechanisms	PREDICTED: sonic hedgehog protein-like [Oreochromis niloticus]
LOC100693391	87	27	2.22243	0.661836	0.000355423	-1.67581	down	[I]	Lipid transport and metabolism	Molecular Function: calcium ion binding (GO:0005509);; Biological Process: metabolic process (GO:0008152);; Molecular Function: transferase activity, transferring acyl groups (GO:0016746);;	K13512|0|mze:101463770|lysophospholipid acyltransferase LPCAT4-like; K13512 lysophospholipid acyltransferase [EC:2.3.1.23 2.3.1.-] (A)	ko00564:Glycerophospholipid metabolism;ko00565:Ether lipid metabolism	Lysophospholipid acyltransferase LPCAT4 GN=lpcat4 OS=Xenopus tropicalis (Western clawed frog) PE=2 SV=1	I	Lipid transport and metabolism	PREDICTED: lysophospholipid acyltransferase LPCAT4-like [Oreochromis niloticus]
pmp22	610	126	13.2132	3.00667	0	-2.30916	down	--	--	Cellular Component: integral component of membrane (GO:0016021);;	--	--	Epithelial membrane protein 2 OS=Danio rerio (Zebrafish) PE=2 SV=2	T	Signal transduction mechanisms	PREDICTED: peripheral myelin protein 22-like [Oreochromis niloticus]
LOC100701769	54	9	1.98554	0.325812	4.39446e-05	-2.42634	down	--	--	Cellular Component: intracellular (GO:0005622);; Molecular Function: zinc ion binding (GO:0008270);;	--	--	Stonustoxin subunit beta OS=Synanceia horrida (Estuarine stonefish) PE=1 SV=3	O	Posttranslational modification, protein turnover, chaperones	PREDICTED: tripartite motif-containing protein 16-like [Oreochromis niloticus]
hsd17b1	1851	577	70.5177	23.1697	2.18714e-14	-1.72803	down	[IQR]	--	Molecular Function: estradiol 17-beta-dehydrogenase activity (GO:0004303);; Cellular Component: cytoplasm (GO:0005737);; Biological Process: estrogen biosynthetic process (GO:0006703);; Biological Process: androgen metabolic process (GO:0008209);; Molecular Function: testosterone dehydrogenase (NAD+) activity (GO:0050327);; Biological Process: oxidation-reduction process (GO:0055114);;	K00044|0|mze:101479338|estradiol 17-beta-dehydrogenase 1-like; K00044 17beta-estradiol 17-dehydrogenase [EC:1.1.1.62] (A)	ko00140:Steroid hormone biosynthesis	D-beta-hydroxybutyrate dehydrogenase, mitochondrial (Precursor) GN=BDH1 OS=Gallus gallus (Chicken) PE=2 SV=1	Q	Secondary metabolites biosynthesis, transport and catabolism	17-beta hydroxysteroid dehydrogenase type 1 [Oreochromis niloticus]
LOC106097206	276	95	1.62722	0.555413	1.07856e-07	-1.57085	down	[R]	General function prediction only	--	--	--	Oocyte zinc finger protein XlCOF8.4 (Fragment) OS=Xenopus laevis (African clawed frog) PE=2 SV=1	221	General function prediction only	PREDICTED: uncharacterized protein LOC102194173 isoform X1 [Pundamilia nyererei]
LOC100693386	115	260	0.772651	1.75689	0.0011603	1.11637	up	[BK]	--	--	K11722|0|mze:101483850|bromodomain-containing protein 4-like; K11722 bromodomain-containing protein 4 (A)	--	Bromodomain-containing protein 4 GN=brd4 OS=Danio rerio (Zebrafish) PE=1 SV=1	K	Transcription	PREDICTED: bromodomain-containing protein 4-like isoform X1 [Oreochromis niloticus]
zbtb46	116	45	0.875577	0.350411	0.00131123	-1.382	down	--	--	Molecular Function: nucleic acid binding (GO:0003676);; Cellular Component: nucleus (GO:0005634);; Molecular Function: metal ion binding (GO:0046872);;	K10517|0|mze:101479304|zinc finger and BTB domain-containing protein 46-like; K10517 zinc finger and BTB domain-containing protein 46 (A)	--	Zinc finger and BTB domain-containing protein 8A.1-A GN=zbtb8a.1-a OS=Xenopus laevis (African clawed frog) PE=2 SV=1	R	General function prediction only	PREDICTED: zinc finger and BTB domain-containing protein 46-like isoform X1 [Neolamprologus brichardi]
LOC100695173	3	31	0.0915059	0.765572	0.00347202	2.76313	up	[GEPR]	--	Molecular Function: ion transmembrane transporter activity (GO:0015075);; Cellular Component: integral component of membrane (GO:0016021);; Biological Process: ion transmembrane transport (GO:0034220);;	K08216|0|mze:101465478|solute carrier family 22 member 6-like; K08216 MFS transporter, OCT family, solute carrier family 22 (organic anion transporter), member 20 (A)	--	Solute carrier family 22 member 6 GN=slc22a6 OS=Danio rerio (Zebrafish) PE=2 SV=1	P	Inorganic ion transport and metabolism	PREDICTED: solute carrier family 22 member 6-like isoform X1 [Oreochromis niloticus]
ndufaf4	1150	2427	28.0168	64.106	0.000109866	1.02713	up	--	--	--	K18161|4.09938e-107|mze:101475604|NADH dehydrogenase [ubiquinone] 1 alpha subcomplex assembly factor 4-like; K18161 NADH dehydrogenase [ubiquinone] 1 alpha subcomplex assembly factor 4 (A)	--	--	S	Function unknown	PREDICTED: NADH dehydrogenase [ubiquinone] 1 alpha subcomplex assembly factor 4-like [Oreochromis niloticus]
LOC102081715	193	56	5.80921	1.61131	2.78431e-08	-1.80328	down	--	--	--	--	--	--	O	Posttranslational modification, protein turnover, chaperones	PREDICTED: uncharacterized protein LOC102081715 [Oreochromis niloticus]
foxd1	489	217	11.5061	5.05326	1.22195e-05	-1.21502	down	[K]	Transcription	Molecular Function: sequence-specific DNA binding transcription factor activity (GO:0003700);; Cellular Component: nucleus (GO:0005634);; Biological Process: regulation of transcription, DNA-templated (GO:0006355);; Molecular Function: sequence-specific DNA binding (GO:0043565);;	K09397|1.1172e-172|mze:101483662|forkhead box protein D1-like; K09397 forkhead box protein D (A)	--	Forkhead box protein D2 OS=Xenopus laevis (African clawed frog) PE=2 SV=1	K	Transcription	PREDICTED: forkhead box protein D1-like [Oreochromis niloticus]
LOC102082625	125	54	1.21949	0.376187	0.00522954	-1.23415	down	--	--	--	--	--	--	R	General function prediction only	PREDICTED: uncharacterized protein LOC102082625 [Oreochromis niloticus]
syt11	819	321	8.6561	3.31408	1.96024e-08	-1.39588	down	--	--	Molecular Function: transporter activity (GO:0005215);; Biological Process: transport (GO:0006810);; Cellular Component: synaptic vesicle (GO:0008021);; Cellular Component: membrane (GO:0016020);;	--	--	Synaptotagmin-C GN=P65-C OS=Diplobatis ommata (Ocellated electric ray) PE=2 SV=1	U	Intracellular trafficking, secretion, and vesicular transport	PREDICTED: synaptotagmin-11-like [Oreochromis niloticus]
Tilapia_newGene_372	74	261	1.11067	4.60562	7.11609e-09	1.7466	up	--	--	--	--	--	--	R	General function prediction only	PREDICTED: V-set and immunoglobulin domain-containing protein 1-like isoform X2 [Oreochromis niloticus]
nkx3-2	134	12	2.86861	0.257708	2.22045e-16	-3.35554	down	--	--	Molecular Function: sequence-specific DNA binding transcription factor activity (GO:0003700);; Cellular Component: nucleus (GO:0005634);; Biological Process: regulation of transcription, DNA-templated (GO:0006355);; Molecular Function: sequence-specific DNA binding (GO:0043565);; Biological Process: embryonic viscerocranium morphogenesis (GO:0048703);;	K09995|8.84916e-169|mze:101476586|homeobox protein Nkx-3.2-like; K09995 homeobox protein Nkx-3.2 (A)	--	Homeobox protein Nkx-3.2 GN=nkx3-2 OS=Xenopus laevis (African clawed frog) PE=2 SV=1	K	Transcription	PREDICTED: homeobox protein Nkx-3.2-like isoform X1 [Maylandia zebra]
LOC100701240	126	367	16.703	45.6534	1.59266e-07	1.48088	up	--	--	Cellular Component: nucleosome (GO:0000786);; Molecular Function: DNA binding (GO:0003677);; Cellular Component: nucleus (GO:0005634);; Biological Process: nucleosome assembly (GO:0006334);; Biological Process: killing of cells of other organism (GO:0031640);; Biological Process: defense response to bacterium (GO:0042742);; Molecular Function: protein heterodimerization activity (GO:0046982);; Bi…	K11251|1.79011e-67|tru:101063100|histone H2A-like; K11251 histone H2A (A)	--	Histone H2A OS=Oncorhynchus mykiss (Rainbow trout) PE=1 SV=2	B	Chromatin structure and dynamics	PREDICTED: histone H2A-like [Haplochromis burtoni]
sbspon	314	62	8.04693	1.50165	1.11022e-16	-2.35802	down	--	--	--	--	--	Spondin-1 (Precursor) GN=spon1 OS=Xenopus laevis (African clawed frog) PE=2 SV=1	W	Extracellular structures	PREDICTED: somatomedin-B and thrombospondin type-1 domain-containing protein-like [Oreochromis niloticus]
LOC100705949	40	7	0.427802	0.0741062	0.00210265	-2.30641	down	--	--	--	--	--	Triple functional domain protein GN=trio OS=Danio rerio (Zebrafish) PE=3 SV=1	T	Signal transduction mechanisms	PREDICTED: rho guanine nucleotide exchange factor 25-like isoform X4 [Oreochromis niloticus]
Tilapia_newGene_1317	21	86	0.453101	1.81616	5.33681e-05	1.90351	up	--	--	--	--	--	--	--	--	PREDICTED: fibroin heavy chain-like [Oreochromis niloticus]
LOC100701750	209	38	4.91384	0.857426	2.59792e-14	-2.45651	down	--	--	--	--	--	--	138	General function prediction only	PREDICTED: uncharacterized protein LOC100701750 [Oreochromis niloticus]
tuft1	198	574	3.58594	10.8741	1.30516e-08	1.47847	up	--	--	--	--	--	Myocardial zonula adherens protein GN=myzap OS=Xenopus tropicalis (Western clawed frog) PE=2 SV=1	S	Function unknown	PREDICTED: tuftelin-like [Oreochromis niloticus]
Tilapia_newGene_8008	75	13	0.960641	0.184941	6.92247e-07	-2.43052	down	--	--	--	--	--	Neoverrucotoxin subunit alpha OS=Synanceia verrucosa (Reef stonefish) PE=1 SV=1	R	General function prediction only	PREDICTED: protein NLRC3-like [Maylandia zebra]
LOC100696287	12231	1156	269.786	26.8689	0	-3.45074	down	--	--	Molecular Function: carbohydrate binding (GO:0030246);;	--	--	Snaclec VP12 subunit B OS=Daboia palaestinae (Palestine viper) PE=1 SV=1	V	Defense mechanisms	PREDICTED: C-type lectin domain family 9 member A-like isoform 2 [Oreochromis niloticus]
LOC100710273	681	164	11.9476	2.92229	0	-2.09182	down	--	--	--	K08220|0|mze:101468256|feline leukemia virus subgroup C receptor-related protein 2-like; K08220 MFS transporter, FLVCR family, feline leukemia virus subgroup C receptor-related protein (A)	--	Major facilitator superfamily domain-containing protein 7-a GN=mfsd7-A OS=Xenopus tropicalis (Western clawed frog) PE=2 SV=1	T	Signal transduction mechanisms	PREDICTED: feline leukemia virus subgroup C receptor-related protein 2 isoform X2 [Oreochromis niloticus]
cpn1	2447	1119	54.5681	24.1473	1.65504e-06	-1.17693	down	--	--	Molecular Function: metallocarboxypeptidase activity (GO:0004181);; Cellular Component: extracellular space (GO:0005615);; Biological Process: proteolysis (GO:0006508);; Molecular Function: zinc ion binding (GO:0008270);; Biological Process: cellular response to estrogen stimulus (GO:0071391);;	K01292|0|mze:101471524|carboxypeptidase N catalytic chain-like; K01292 carboxypeptidase N catalytic subunit [EC:3.4.17.3] (A)	--	Carboxypeptidase E (Precursor) GN=cpe OS=Lophius americanus (American goosefish) PE=2 SV=1	R	General function prediction only	PREDICTED: carboxypeptidase N catalytic chain-like [Oreochromis niloticus]
rtbdn	15474	1302	363.154	30.9214	0	-3.61866	down	--	--	--	K13649|8.70813e-153|ola:101163821|riboflavin-binding protein-like; K13649 folate receptor (A)	ko04144:Endocytosis	Riboflavin-binding protein, yolk minor form (Precursor) OS=Gallus gallus (Chicken) PE=1 SV=2	R	General function prediction only	riboflavin-binding protein precursor [Oreochromis niloticus]
LOC100703360	262	33	19.6944	2.79188	0	-2.9744	down	--	--	--	--	--	--	--	--	PREDICTED: ly6/PLAUR domain-containing protein 2-like isoform X1 [Oreochromis niloticus]
LOC102082155	52	158	3.86967	11.9458	3.00472e-05	1.5243	up	--	--	--	--	--	Nectin-4 (Precursor) GN=pvrl4 OS=Xenopus tropicalis (Western clawed frog) PE=2 SV=2	R	General function prediction only	PREDICTED: OX-2 membrane glycoprotein-like isoform X1 [Oreochromis niloticus]
LOC106099031	1838	4116	43.2924	135.851	1.0381e-05	1.11305	up	--	--	--	K08466|0|mze:101481282|probable G-protein coupled receptor 144-like; K08466 G protein-coupled receptor 144 (A)	--	Pentraxin fusion protein (Precursor) GN=pxn1 OS=Xenopus laevis (African clawed frog) PE=2 SV=1	T	Signal transduction mechanisms	PREDICTED: probable G-protein coupled receptor 144-like [Oreochromis niloticus]
irf4	377	126	11.3155	4.50897	3.39587e-09	-1.61732	down	--	--	Molecular Function: regulatory region DNA binding (GO:0000975);; Molecular Function: sequence-specific DNA binding transcription factor activity (GO:0003700);; Biological Process: regulation of transcription, DNA-templated (GO:0006355);;	K09445|0|ola:101161045|interferon regulatory factor 4-like; K09445 interferon regulatory factor 4 (A)	--	Interferon regulatory factor 8 GN=IRF8 OS=Gallus gallus (Chicken) PE=2 SV=1	K	Transcription	PREDICTED: interferon regulatory factor 4-like [Oreochromis niloticus]
LOC100698698	1059	19	18.8472	0.335158	0	-5.72752	down	--	--	--	K18273|0|mze:101478398|alpha-tectorin-like (A)	--	Alpha-tectorin (Precursor) GN=TECTA OS=Gallus gallus (Chicken) PE=1 SV=1	--	--	PREDICTED: uromodulin-like [Oreochromis niloticus]
LOC100696774	197	67	1.8382	0.672896	1.33925e-06	-1.58095	down	--	--	Biological Process: carbohydrate metabolic process (GO:0005975);; Biological Process: dorsal/ventral axis specification (GO:0009950);; Molecular Function: transferase activity, transferring glycosyl groups (GO:0016757);; Biological Process: proteoglycan biosynthetic process (GO:0030166);; Biological Process: positive regulation of BMP signaling pathway (GO:0030513);; Biological Process: otolith d…	K09905|0|mze:101473785|beta-1,4-galactosyltransferase 5-like; K09905 beta-1,4-galactosyltransferase 5 [EC:2.4.1.-] (A)	ko00512:Mucin type O-Glycan biosynthesis	--	G	Carbohydrate transport and metabolism	PREDICTED: beta-1,4-galactosyltransferase 5-like [Oreochromis niloticus]
LOC100698513	404	195	8.8148	4.70754	0.000300896	-1.09351	down	--	--	Biological Process: heart morphogenesis (GO:0003007);; Biological Process: JNK cascade (GO:0007254);; Molecular Function: zinc ion binding (GO:0008270);; Biological Process: Wnt signaling pathway (GO:0016055);; Biological Process: cell migration involved in gastrulation (GO:0042074);; Biological Process: convergent extension involved in gastrulation (GO:0060027);;	K09377|8.98989e-106|mze:101487148|cysteine and glycine-rich protein 1-like; K09377 cysteine and glycine-rich protein (A)	--	Cysteine and glycine-rich protein 1 GN=CSRP1 OS=Coturnix coturnix japonica (Japanese quail) PE=2 SV=2	Z	Cytoskeleton	PREDICTED: cysteine and glycine-rich protein 1-like isoform 1 [Oreochromis niloticus]
LOC100698691	17253	5360	1024.89	298.465	2.10942e-15	-1.73558	down	--	--	--	--	--	--	W	Extracellular structures	PREDICTED: extracellular matrix protein 1-like [Oreochromis niloticus]
stx3	1763	859	26.213	14.9037	2.53622e-05	-1.08514	down	--	--	Molecular Function: SNAP receptor activity (GO:0005484);; Biological Process: neurotransmitter transport (GO:0006836);; Biological Process: intracellular protein transport (GO:0006886);; Cellular Component: membrane (GO:0016020);; Biological Process: vesicle-mediated transport (GO:0016192);;	K08486|3.16611e-159|mze:101467443|syntaxin-3-like; K08486 syntaxin 1B/2/3 (A)	ko04130:SNARE interactions in vesicular transport	--	U	Intracellular trafficking, secretion, and vesicular transport	PREDICTED: syntaxin-3-like isoformX3 [Oreochromis niloticus]
LOC100693734	340	132	4.32793	1.81096	9.92298e-07	-1.40275	down	--	--	--	K14991|0|mze:101480634|sodium-coupled neutral amino acid transporter 4-like; K14991 solute carrier family 38 (sodium-coupled neutral amino acid transporter), member 4 (A)	--	Sodium-coupled neutral amino acid transporter 2 GN=slc38a2 OS=Danio rerio (Zebrafish) PE=3 SV=1	E	Amino acid transport and metabolism	PREDICTED: sodium-coupled neutral amino acid transporter 4-like isoform X1 [Oreochromis niloticus]
g0s2	31	1	2.38261	0.119049	6.20829e-05	-3.63794	down	--	--	--	--	--	--	179	Function unknown	PREDICTED: G0/G1 switch protein 2-like [Maylandia zebra]
mlc1	108	3	2.3153	0.0676932	0	-4.58908	down	--	--	--	--	--	--	S	Function unknown	PREDICTED: membrane protein MLC1-like isoform X1 [Oreochromis niloticus]
LOC100699061	202	31	2.00855	0.3573	6.66134e-16	-2.68749	down	[R]	General function prediction only	Molecular Function: neurotransmitter:sodium symporter activity (GO:0005328);; Biological Process: neurotransmitter transport (GO:0006836);; Cellular Component: integral component of membrane (GO:0016021);;	K05039|0|mze:101476219|sodium- and chloride-dependent GABA transporter 2-like; K05039 solute carrier family 6 (neurotransmitter transporter, GABA) member 6/8/11/12/13 (A)	--	Creatine transporter OS=Torpedo marmorata (Marbled electric ray) PE=2 SV=1	T	Signal transduction mechanisms	PREDICTED: sodium- and chloride-dependent GABA transporter 2-like isoform X1 [Oreochromis niloticus]
LOC100694141	140	54	3.18677	1.22339	0.00032381	-1.39563	down	--	--	Molecular Function: sulfotransferase activity (GO:0008146);;	K01024|0|mze:101475274|heparan sulfate glucosamine 3-O-sulfotransferase 1-like; K01024 [heparan sulfate]-glucosamine 3-sulfotransferase 1 [EC:2.8.2.23] (A)	ko00534:Glycosaminoglycan biosynthesis - heparan sulfate / heparin	--	O	Posttranslational modification, protein turnover, chaperones	PREDICTED: heparan sulfate glucosamine 3-O-sulfotransferase 1-like [Oreochromis niloticus]
tnfrsf11a	883	400	11.0358	5.12682	4.38395e-06	-1.1883	down	--	--	--	K05147|0|mze:101466954|tumor necrosis factor receptor superfamily member 11A-like; K05147 tumor necrosis factor receptor superfamily member 11A (A)	ko04060:Cytokine-cytokine receptor interaction	Tumor necrosis factor receptor superfamily member 16 (Precursor) GN=NGFR OS=Gallus gallus (Chicken) PE=3 SV=1	T	Signal transduction mechanisms	PREDICTED: tumor necrosis factor receptor superfamily member 11A-like isoform X1 [Oreochromis niloticus]
gltp	31	3	1.00213	0.104976	0.0015236	-2.84154	down	--	--	Cellular Component: cytoplasm (GO:0005737);; Molecular Function: glycolipid transporter activity (GO:0017089);; Biological Process: glycolipid transport (GO:0046836);; Molecular Function: glycolipid binding (GO:0051861);;	--	--	Glycolipid transfer protein GN=gltp OS=Danio rerio (Zebrafish) PE=3 SV=1	G	Carbohydrate transport and metabolism	PREDICTED: glycolipid transfer protein-like isoform X1 [Oreochromis niloticus]
LOC102082199	65	13	0.37005	0.0787727	2.64428e-05	-2.22886	down	--	--	--	--	--	--	R	General function prediction only	PREDICTED: FERM and PDZ domain-containing protein 1-like isoform X2 [Oreochromis niloticus]
LOC100710286	1568	301	27.2668	5.61274	0	-2.42378	down	--	--	--	--	--	Class I histocompatibility antigen, F10 alpha chain (Precursor) OS=Gallus gallus (Chicken) PE=2 SV=1	--	--	PREDICTED: major histocompatibility complex class I-related gene protein-like isoform X1 [Oreochromis niloticus]
LOC100700068	974	2309	17.3159	40.9729	1.21987e-06	1.19454	up	--	--	--	--	--	--	440	Function unknown	PREDICTED: uncharacterized protein LOC100700068 [Oreochromis niloticus]
LOC100702677	666	1404	11.2761	22.0713	0.000154851	1.02477	up	[T]	Signal transduction mechanisms	Molecular Function: phosphoprotein phosphatase activity (GO:0004721);; Biological Process: protein dephosphorylation (GO:0006470);;	K01102|0|mze:101487392|Pyruvate dehydrogenase [acetyl-transferring]-phosphatase 1-like; K01102 pyruvate dehydrogenase phosphatase [EC:3.1.3.43] (A)	--	--	T	Signal transduction mechanisms	PREDICTED: Pyruvate dehydrogenase [acetyl-transferring]-phosphatase 1-like isoform X1 [Oreochromis niloticus]
pacsin3	236	121	5.06727	2.9999	0.00815911	-1.00293	down	--	--	Cellular Component: plasma membrane (GO:0005886);; Biological Process: notochord formation (GO:0014028);; Biological Process: notochord cell differentiation (GO:0060034);;	--	--	Protein kinase C and casein kinase substrate in neurons protein 2 GN=PACSIN2 OS=Gallus gallus (Chicken) PE=1 SV=1	T	Signal transduction mechanisms	PREDICTED: protein kinase C and casein kinase II substrate protein 3-like [Oreochromis niloticus]
LOC100696305	56	13	1.03524	0.245103	0.000692188	-2.0196	down	--	--	--	--	--	Protein APCDD1 (Precursor) GN=apcdd1 OS=Xenopus laevis (African clawed frog) PE=2 SV=1	T	Signal transduction mechanisms	PREDICTED: protein APCDD1-like [Oreochromis niloticus]
espn	33	1	0.364277	0.0113081	2.0273e-05	-3.72369	down	[R]	General function prediction only	--	--	--	Serine/threonine-protein phosphatase 6 regulatory ankyrin repeat subunit C GN=ankrd52 OS=Danio rerio (Zebrafish) PE=2 SV=1	R	General function prediction only	PREDICTED: espin isoform X1 [Oreochromis niloticus]
LOC102082001	70	21	1.17904	0.408965	0.00150445	-1.70684	down	--	--	--	--	--	--	S	Function unknown	PREDICTED: coxsackievirus and adenovirus receptor homolog [Oreochromis niloticus]
LOC100701996	123	35	1.36803	0.407538	2.66106e-06	-1.81289	down	--	--	Molecular Function: DNA binding (GO:0003677);; Molecular Function: sequence-specific DNA binding transcription factor activity (GO:0003700);; Cellular Component: nucleus (GO:0005634);; Biological Process: regulation of transcription, DNA-templated (GO:0006355);;	K10180|0|mze:101471115|T-box-containing protein TBX6L-like; K10180 T-box protein 6 (A)	--	T-box-containing protein TBX6L (Fragment) GN=TBX6L OS=Gallus gallus (Chicken) PE=2 SV=1	K	Transcription	PREDICTED: T-box-containing protein TBX6L-like [Oreochromis niloticus]
greb1	209	92	1.45159	0.624099	0.00046357	-1.21791	down	--	--	--	--	--	--	S	Function unknown	PREDICTED: protein GREB1 [Oreochromis niloticus]
LOC100711323	770	1654	17.5825	35.9483	7.01469e-05	1.05207	up	[Z]	Cytoskeleton	Molecular Function: GTPase activity (GO:0003924);; Molecular Function: structural constituent of cytoskeleton (GO:0005200);; Molecular Function: GTP binding (GO:0005525);; Cellular Component: cytoplasm (GO:0005737);; Cellular Component: microtubule (GO:0005874);; Cellular Component: plasma membrane (GO:0005886);; Biological Process: GTP catabolic process (GO:0006184);; Biological Process: microtu…	K07375|0|mze:101478022|tubulin beta-5 chain-like; K07375 tubulin beta (A)	ko04145:Phagosome;ko04540:Gap junction	Tubulin beta-5 chain OS=Gallus gallus (Chicken) PE=3 SV=1	Z	Cytoskeleton	PREDICTED: tubulin beta-5 chain-like isoform X1 [Maylandia zebra]
LOC100696589	1412	408	66.0032	19.2824	9.99201e-16	-1.8361	down	[G]	Carbohydrate transport and metabolism	Biological Process: phosphatidylinositol phosphorylation (GO:0046854);;	K01092|0|mze:101480097|inositol monophosphatase 1-like; K01092 myo-inositol-1(or 4)-monophosphatase [EC:3.1.3.25] (A)	ko00562:Inositol phosphate metabolism;ko04070:Phosphatidylinositol signaling system	Inositol monophosphatase 1 GN=impa1 OS=Xenopus laevis (African clawed frog) PE=2 SV=1	G	Carbohydrate transport and metabolism	PREDICTED: inositol monophosphatase 1-like isoform X1 [Oreochromis niloticus]
dlgap2	1239	144	6.87767	0.806159	0	-3.13924	down	--	--	--	--	--	Disks large-associated protein 1 GN=si:zc142h2.3 OS=Danio rerio (Zebrafish) PE=3 SV=2	T	Signal transduction mechanisms	PREDICTED: serine-rich adhesin for platelets-like isoform X1 [Maylandia zebra]
LOC102081443	114	0	1.47727	0	0	-6.1252	down	--	--	--	--	--	--	R	General function prediction only	PREDICTED: nuclear GTPase SLIP-GC-like isoform X1 [Oreochromis niloticus]
LOC100702504	25	207	0.208159	1.77664	0	2.91959	up	--	--	--	--	--	Rho GTPase-activating protein 21 GN=arhgap21 OS=Xenopus tropicalis (Western clawed frog) PE=2 SV=1	T	Signal transduction mechanisms	PREDICTED: rho GTPase-activating protein 22-like isoform X1 [Oreochromis niloticus]
LOC100709580	30	3	0.540752	0.0566241	0.00253718	-2.79667	down	--	--	Biological Process: sphingosine-1-phosphate signaling pathway (GO:0003376);; Cellular Component: integral component of membrane (GO:0016021);; Molecular Function: sphingosine-1-phosphate receptor activity (GO:0038036);;	K04290|0|mze:101486133|sphingosine 1-phosphate receptor 3-like; K04290 sphingosine 1-phosphate receptor 3 (A)	ko04080:Neuroactive ligand-receptor interaction	Sphingosine 1-phosphate receptor 3 GN=s1pr3 OS=Takifugu rubripes (Japanese pufferfish) PE=3 SV=1	T	Signal transduction mechanisms	PREDICTED: sphingosine 1-phosphate receptor 3-like [Oreochromis niloticus]
LOC100712501	634	196	12.3629	4.12256	3.10585e-12	-1.73418	down	--	--	--	--	--	Coxsackievirus and adenovirus receptor homolog (Precursor) GN=cxadr OS=Danio rerio (Zebrafish) PE=2 SV=1	--	--	PREDICTED: ICOS ligand-like [Haplochromis burtoni]
LOC100703707	32	99	1.83263	3.22004	0.000917296	1.53194	up	[G]	Carbohydrate transport and metabolism	Biological Process: carbohydrate metabolic process (GO:0005975);; Biological Process: dephosphorylation (GO:0016311);; Molecular Function: fructose 1,6-bisphosphate 1-phosphatase activity (GO:0042132);;	K03841|0|mze:101482731|fructose-1,6-bisphosphatase isozyme 2-like; K03841 fructose-1,6-bisphosphatase I [EC:3.1.3.11] (A)	ko00010:Glycolysis / Gluconeogenesis;ko00030:Pentose phosphate pathway;ko00051:Fructose and mannose metabolism;ko01200:Carbon metabolism;ko04910:Insulin signaling pathway	--	G	Carbohydrate transport and metabolism	PREDICTED: fructose-1,6-bisphosphatase isozyme 2-like [Oreochromis niloticus]
cfap45	33	99	0.58856	1.64844	0.00146492	1.4897	up	--	--	--	--	--	--	S	Function unknown	PREDICTED: coiled-coil domain-containing protein 19, mitochondrial-like isoform X1 [Oreochromis niloticus]
LOC100708389	2	70	0.0355726	1.1337	6.25078e-12	4.24421	up	--	--	Cellular Component: intracellular (GO:0005622);; Cellular Component: membrane (GO:0016020);; Biological Process: intracellular signal transduction (GO:0035556);;	--	--	Protein cornichon homolog 2 GN=cnih2 OS=Danio rerio (Zebrafish) PE=2 SV=1	T	Signal transduction mechanisms	PREDICTED: protein cornichon homolog 3-like isoform X1 [Maylandia zebra]
prkag1	1245	379	24.2734	8.09104	2.80886e-14	-1.76064	down	[R]	General function prediction only	Molecular Function: kinase activity (GO:0016301);; Biological Process: phosphorylation (GO:0016310);; Molecular Function: adenyl nucleotide binding (GO:0030554);;	K07200|0|mze:101476687|5'-AMP-activated protein kinase subunit gamma-1-like; K07200 5'-AMP-activated protein kinase, regulatory gamma subunit (A)	ko04068:FoxO signaling pathway;ko04910:Insulin signaling pathway;ko04920:Adipocytokine signaling pathway	--	C	Energy production and conversion	PREDICTED: 5&apos;-AMP-activated protein kinase subunit gamma-1-like [Oreochromis niloticus]
ftcd	5	50	0.118712	1.15005	8.0333e-06	2.90829	up	[E]	Amino acid transport and metabolism	Molecular Function: folic acid binding (GO:0005542);; Cellular Component: Golgi apparatus (GO:0005794);; Molecular Function: transferase activity (GO:0016740);; Biological Process: cellular metabolic process (GO:0044237);;	K13990|0|mze:101467078|formimidoyltransferase-cyclodeaminase-like; K13990 glutamate formiminotransferase / formiminotetrahydrofolate cyclodeaminase [EC:2.1.2.5 4.3.1.4] (A)	ko00340:Histidine metabolism;ko00670:One carbon pool by folate	Formimidoyltetrahydrofolate cyclodeaminase GN=FTCD OS=Gallus gallus (Chicken) PE=2 SV=1	E	Amino acid transport and metabolism	PREDICTED: formimidoyltransferase-cyclodeaminase-like [Oreochromis niloticus]
LOC100702290	1	38	0.0244396	0.726461	3.75503e-06	3.85249	up	--	--	Molecular Function: endonuclease activity (GO:0004519);; Molecular Function: deoxyribonuclease activity (GO:0004536);; Biological Process: DNA catabolic process (GO:0006308);; Biological Process: nucleic acid phosphodiester bond hydrolysis (GO:0090305);;	K11995|1.68535e-159|mze:101485000|deoxyribonuclease gamma-like; K11995 deoxyribonuclease-1-like protein [EC:3.1.21.-] (A)	--	Deoxyribonuclease-1 (Precursor) GN=DNASE1 OS=Gallus gallus (Chicken) PE=1 SV=1	R	General function prediction only	PREDICTED: deoxyribonuclease gamma-like, partial [Oreochromis niloticus]
LOC100696779	82	25	0.820102	0.249446	0.000466355	-1.69621	down	--	--	--	K17447|0|mze:101463941|SHC-transforming protein 2-like; K17447 SHC- transforming protein 2 (A)	ko04012:ErbB signaling pathway;ko04370:VEGF signaling pathway;ko04510:Focal adhesion;ko04910:Insulin signaling pathway	SHC-transforming protein 1 GN=shc1 OS=Xenopus laevis (African clawed frog) PE=1 SV=2	T	Signal transduction mechanisms	PREDICTED: SHC-transforming protein 2-like isoform X1 [Oreochromis niloticus]
LOC100696464	2104	999	44.4063	21.6865	8.31229e-06	-1.1226	down	--	--	--	--	--	--	151	Function unknown	PREDICTED: uncharacterized protein LOC100696464 [Oreochromis niloticus]
LOC100694183	7	1057	0.235665	31.4166	0	6.88489	up	[Z]	Cytoskeleton	Molecular Function: ATP binding (GO:0005524);; Cellular Component: cytoplasm (GO:0005737);; Cellular Component: cytoskeleton (GO:0005856);;	K05692|0|mze:101487522|actin, cytoplasmic 1-like; K05692 actin beta/gamma 1 (A)	ko04145:Phagosome;ko04510:Focal adhesion;ko04520:Adherens junction;ko04530:Tight junction;ko04810:Regulation of actin cytoskeleton;ko05132:Salmonella infection	Actin, cytoplasmic 1, N-terminally processed GN=actb OS=Salmo salar (Atlantic salmon) PE=2 SV=1	Z	Cytoskeleton	PREDICTED: actin, cytoplasmic 1-like [Oreochromis niloticus]
LOC100692860	468	223	19.7928	9.05171	0.000129909	-1.11287	down	[HC]	--	Molecular Function: cytochrome-b5 reductase activity, acting on NAD(P)H (GO:0004128);; Cellular Component: integral component of membrane (GO:0016021);; Biological Process: sterol biosynthetic process (GO:0016126);; Biological Process: oxidation-reduction process (GO:0055114);;	K00326|0|mze:101463585|NADH-cytochrome b5 reductase 2-like; K00326 cytochrome-b5 reductase [EC:1.6.2.2] (A)	ko00520:Amino sugar and nucleotide sugar metabolism	NADH-cytochrome b5 reductase 2 GN=cyb5r2 OS=Danio rerio (Zebrafish) PE=2 SV=2	C	Energy production and conversion	PREDICTED: NADH-cytochrome b5 reductase 2-like [Oreochromis niloticus]
timm8b	411	927	33.9015	73.8932	2.5686e-05	1.12094	up	--	--	Cellular Component: mitochondrial inner membrane (GO:0005743);; Biological Process: protein transport (GO:0015031);; Molecular Function: metal ion binding (GO:0046872);;	K17780|2.30332e-59|mze:101470446|mitochondrial import inner membrane translocase subunit Tim8 A-like; K17780 mitochondrial import inner membrane translocase subunit TIM8 (A)	--	Mitochondrial import inner membrane translocase subunit Tim8 A GN=timm8a OS=Xenopus laevis (African clawed frog) PE=3 SV=1	U	Intracellular trafficking, secretion, and vesicular transport	PREDICTED: mitochondrial import inner membrane translocase subunit Tim8 A-like [Oreochromis niloticus]
LOC100698925	162	51	1.51668	0.639799	1.27901e-06	-1.68376	down	--	--	--	--	--	Xin actin-binding repeat-containing protein 1 GN=Xirp1 OS=Gallus gallus (Chicken) PE=2 SV=3	S	Function unknown	PREDICTED: xin actin-binding repeat-containing protein 2-like [Oreochromis niloticus]
LOC100534438	325	167	7.36943	4.16241	0.00307648	-1.00255	down	--	--	Molecular Function: cysteine-type endopeptidase activity (GO:0004197);; Cellular Component: cytoplasm (GO:0005737);; Biological Process: proteolysis (GO:0006508);; Biological Process: apoptotic process (GO:0006915);;	K02187|0|mze:101478576|caspase-3-like; K02187 caspase 3 [EC:3.4.22.56] (A)	ko04010:MAPK signaling pathway;ko04115:p53 signaling pathway;ko04210:Apoptosis;ko05168:Herpes simplex infection	Caspase-3 subunit p12 (Precursor) GN=casp3 OS=Xenopus laevis (African clawed frog) PE=2 SV=1	D	Cell cycle control, cell division, chromosome partitioning	caspase-3 [Oreochromis niloticus]
LOC100704536	162	45	1.9066	0.447307	7.02526e-08	-1.85809	down	--	--	--	K16513|0|mze:101468964|carboxyl-terminal PDZ ligand of neuronal nitric oxide synthase protein-like; K16513 carboxyl-terminal PDZ ligand of neuronal nitric oxide synthase protein (A)	--	Low density lipoprotein receptor adapter protein 1-B GN=ldlrap1-b OS=Xenopus laevis (African clawed frog) PE=1 SV=1	T	Signal transduction mechanisms	PREDICTED: uncharacterized protein DDB_G0271670-like isoform X1 [Oreochromis niloticus]
zeb2	564	246	3.8516	1.64584	4.11183e-06	-1.2406	down	[R]	General function prediction only	--	K09299|0|mze:101481193|zinc finger E-box-binding homeobox 2-like; K09299 zinc finger homeobox protein 1/2 (A)	--	Zinc finger E-box-binding homeobox 1 GN=ZEB1 OS=Gallus gallus (Chicken) PE=2 SV=1	K	Transcription	PREDICTED: zinc finger E-box-binding homeobox 2-like isoform X2 [Oreochromis niloticus]
LOC100708648	110	257	2.94823	7.19702	0.000559866	1.16293	up	--	--	--	K07820|0|mze:101481577|beta-1,3-galactosyltransferase 2-like; K07820 beta-1,3-galactosyltransferase 2 [EC:2.4.1.-] (A)	ko00601:Glycosphingolipid biosynthesis - lacto and neolacto series	Lactosylceramide 1,3-N-acetyl-beta-D-glucosaminyltransferase GN=b3gnt5 OS=Xenopus tropicalis (Western clawed frog) PE=2 SV=1	G	Carbohydrate transport and metabolism	PREDICTED: beta-1,3-galactosyltransferase 2-like [Oreochromis niloticus]
lama1	285	57	1.6551	0.312642	1.66533e-15	-2.33689	down	--	--	Biological Process: neuron migration (GO:0001764);; Biological Process: optokinetic behavior (GO:0007634);; Biological Process: motor neuron axon guidance (GO:0008045);; Biological Process: notochord development (GO:0030903);; Biological Process: retinal ganglion cell axon guidance (GO:0031290);; Biological Process: camera-type eye development (GO:0043010);; Biological Process: blood vessel morph…	K05637|0|mze:101477084|laminin subunit alpha-1-like; K05637 laminin, alpha 1/2 (A)	ko04510:Focal adhesion;ko04512:ECM-receptor interaction	Laminin subunit gamma-1 (Precursor) GN=lamc1 OS=Danio rerio (Zebrafish) PE=2 SV=2	W	Extracellular structures	PREDICTED: laminin subunit alpha-1 [Oreochromis niloticus]
LOC100697562	126	3	1.88648	0.0451475	0	-4.80835	down	[P]	Inorganic ion transport and metabolism	Biological Process: single-organism transport (GO:0044765);;	K14445|0|mze:101473547|solute carrier family 13 member 5-like; K14445 solute carrier family 13 (sodium-dependent dicarboxylate transporter), member 2/3/5 (A)	--	--	P	Inorganic ion transport and metabolism	PREDICTED: solute carrier family 13 member 5 [Oreochromis niloticus]
LOC102081834	5	35	0.545144	2.3901	0.00585276	2.41407	up	--	--	--	--	--	--	S	Function unknown	PREDICTED: butyrophilin subfamily 1 member A1-like [Oreochromis niloticus]
LOC100704867	126	53	1.2084	0.489409	0.00315594	-1.27163	down	--	--	--	--	--	Leucine-rich repeat and fibronectin type III domain-containing protein 1 (Precursor) GN=lrfn1 OS=Danio rerio (Zebrafish) PE=2 SV=1	T	Signal transduction mechanisms	PREDICTED: SLIT and NTRK-like family, member 3 isoform X1 [Oreochromis niloticus]
Tilapia_newGene_8086	9563	27274	366.879	1065.57	1.98612e-10	1.46248	up	--	--	--	--	--	--	--	--	PREDICTED: uncharacterized protein LOC101480443 [Maylandia zebra]
LOC106098360	121	254	3.0289	6.7625	0.00675079	1.01055	up	--	--	--	--	--	--	S	Function unknown	PREDICTED: protein FAM111A-like [Maylandia zebra]
LOC100708531	70	12	1.29699	0.246163	1.6735e-06	-2.43475	down	[R]	General function prediction only	Molecular Function: GTP binding (GO:0005525);; Cellular Component: intracellular (GO:0005622);; Biological Process: small GTPase mediated signal transduction (GO:0007264);; Biological Process: protein transport (GO:0015031);;	K07923|3.02437e-150|mze:101471556|ras-related protein Rab-38-like; K07923 Ras-related protein Rab-38 (A)	--	Ras-related protein Rab-10 GN=RAB10 OS=Gallus gallus (Chicken) PE=2 SV=1	U	Intracellular trafficking, secretion, and vesicular transport	PREDICTED: ras-related protein Rab-38-like [Oreochromis niloticus]
clg23h19orf44	380	54	9.03724	1.25641	0	-2.82551	down	--	--	--	--	--	--	S	Function unknown	PREDICTED: uncharacterized protein C19orf44-like [Neolamprologus brichardi]
LOC100704318	165	47	10.413	3.0815	1.02688e-07	-1.82381	down	--	--	Molecular Function: chromatin binding (GO:0003682);; Molecular Function: phosphoribosylaminoimidazolesuccinocarboxamide synthase activity (GO:0004639);; Molecular Function: ATP binding (GO:0005524);; Biological Process: 'de novo' IMP biosynthetic process (GO:0006189);; Biological Process: embryo development (GO:0009790);; Molecular Function: 5-(carboxyamino)imidazole ribonucleotide mutase activit…	K01587|4.82328e-113|mze:101482534|multifunctional protein ADE2-like; K01587 phosphoribosylaminoimidazole carboxylase / phosphoribosylaminoimidazole-succinocarboxamide synthase [EC:4.1.1.21 6.3.2.6] (A)	ko00230:Purine metabolism	Phosphoribosylaminoimidazole carboxylase GN=AIRC OS=Gallus gallus (Chicken) PE=2 SV=1	F	Nucleotide transport and metabolism	PREDICTED: multifunctional protein ADE2-like, partial [Maylandia zebra]
nhs	125	39	0.833381	0.257878	1.33265e-05	-1.68666	down	--	--	--	--	--	--	R	General function prediction only	PREDICTED: nance-Horan syndrome protein-like isoform X1 [Oreochromis niloticus]
tenm3	1126	45	7.84607	0.282439	0	-4.64267	down	--	--	--	--	--	Teneurin-3 GN=tenm3 OS=Danio rerio (Zebrafish) PE=2 SV=1	T	Signal transduction mechanisms	PREDICTED: teneurin-3-like [Oreochromis niloticus]
LOC100706637	1121	426	7.62762	2.84224	1.86152e-09	-1.44155	down	--	--	--	K05724|0|mze:101485332|FYVE, RhoGEF and PH domain-containing protein 5-like; K05724 FYVE, RhoGEF and PH domain containing 5/6 (A)	--	FERM, RhoGEF and pleckstrin domain-containing protein 1 GN=FARP1 OS=Gallus gallus (Chicken) PE=1 SV=2	T	Signal transduction mechanisms	PREDICTED: FYVE, RhoGEF and PH domain-containing protein 5-like isoform X1 [Oreochromis niloticus]
LOC102077391	65	19	1.88133	0.715633	0.00208061	-1.73546	down	--	--	--	--	--	--	590	General function prediction only	PREDICTED: uncharacterized protein LOC102077391 [Oreochromis niloticus]
LOC100701202	3032	1080	67.2453	23.7118	1.03479e-11	-1.53709	down	--	--	Cellular Component: extracellular space (GO:0005615);;	--	--	--	W	Extracellular structures	PREDICTED: uncharacterized protein LOC100701202 [Oreochromis niloticus]
LOC100695482	119	50	2.14166	0.93959	0.00432665	-1.27162	down	--	--	Molecular Function: actin binding (GO:0003779);; Molecular Function: ATP binding (GO:0005524);; Cellular Component: cytoplasm (GO:0005737);; Cellular Component: Arp2/3 protein complex (GO:0005885);; Biological Process: Arp2/3 complex-mediated actin nucleation (GO:0034314);; Cellular Component: cell projection (GO:0042995);;	K17260|0|mze:101481337|actin-related protein 2-B-like; K17260 actin-related protein 2 (A)	--	Actin-related protein 2-B GN=actr2-b OS=Xenopus laevis (African clawed frog) PE=2 SV=1	Z	Cytoskeleton	PREDICTED: actin-related protein 2-B-like isoform X1 [Oreochromis niloticus]
khdrbs2	54	12	0.844492	0.199387	0.000652975	-2.07021	down	[A]	RNA processing and modification	Cellular Component: nucleus (GO:0005634);; Biological Process: regulation of transcription, DNA-templated (GO:0006355);; Molecular Function: poly(A) binding (GO:0008143);; Molecular Function: poly(U) RNA binding (GO:0008266);; Molecular Function: SH3 domain binding (GO:0017124);; Molecular Function: SH2 domain binding (GO:0042169);; Molecular Function: protein heterodimerization activity (GO:0046…	K17843|0|mze:101464517|KH domain-containing, RNA-binding, signal transduction-associated protein 2-like; K17843 KH domain-containing, RNA-binding, signal transduction-associated protein 2 (A)	--	KH domain-containing, RNA-binding, signal transduction-associated protein 2 GN=khdrbs2 OS=Danio rerio (Zebrafish) PE=2 SV=1	A	RNA processing and modification	PREDICTED: KH domain-containing, RNA-binding, signal transduction-associated protein 2-like [Oreochromis niloticus]
LOC106098973	74	24	1.20135	0.446456	0.00253258	-1.60624	down	--	--	--	K08727|0|mze:101481871|protein NLRC5-like; K08727 nucleotide-binding oligomerization domain-containing protein 1 (A)	ko04621:NOD-like receptor signaling pathway	--	S	Function unknown	PREDICTED: nucleotide-binding oligomerization domain-containing protein 2-like [Oreochromis niloticus]
LOC100690057	33	95	1.22054	3.67946	0.00362217	1.43123	up	[C]	Energy production and conversion	Cellular Component: vacuolar proton-transporting V-type ATPase, V0 domain (GO:0000220);; Molecular Function: hydrogen ion transmembrane transporter activity (GO:0015078);; Biological Process: ATP hydrolysis coupled proton transport (GO:0015991);; Biological Process: response to chemical (GO:0042221);;	K02154|0|mze:101465343|V-type proton ATPase 116 kDa subunit a isoform 1-like; K02154 V-type H+-transporting ATPase subunit a (A)	ko00190:Oxidative phosphorylation;ko04142:Lysosome;ko04145:Phagosome	V-type proton ATPase 116 kDa subunit a isoform 1 GN=ATP6V0A1 OS=Gallus gallus (Chicken) PE=1 SV=1	C	Energy production and conversion	PREDICTED: V-type proton ATPase 116 kDa subunit a isoform 1-like isoform X1 [Maylandia zebra]
LOC106097359	17	181	0.526333	4.48342	0	3.24245	up	--	--	--	--	--	--	267	General function prediction only	PREDICTED: G2/M phase-specific E3 ubiquitin-protein ligase-like [Notothenia coriiceps]
chst11	113	42	0.921765	0.436539	0.000756903	-1.44049	down	--	--	--	K01017|0|mze:101483453|carbohydrate sulfotransferase 11-like; K01017 chondroitin 4-sulfotransferase 11 [EC:2.8.2.5] (A)	ko00532:Glycosaminoglycan biosynthesis - chondroitin sulfate / dermatan sulfate	Carbohydrate sulfotransferase 11 GN=chst11 OS=Danio rerio (Zebrafish) PE=2 SV=1	W	Extracellular structures	PREDICTED: carbohydrate sulfotransferase 11-like isoform X1 [Oreochromis niloticus]
bmf	111	47	1.45869	0.623327	0.00732947	-1.25887	down	--	--	--	K17460|3.58373e-95|mze:101466484|bcl-2-modifying factor-like; K17460 Bcl-2-modifying factor (A)	--	--	A	RNA processing and modification	PREDICTED: bcl-2-modifying factor-like isoform X1 [Oreochromis niloticus]
LOC100710729	900	464	24.9267	13.5908	0.000367965	-1.00249	down	--	--	--	K15014|0|mze:101486053|equilibrative nucleoside transporter 2-like; K15014 solute carrier family 29 (equilibrative nucleoside transporter), member 1/2/3 (A)	--	--	F	Nucleotide transport and metabolism	PREDICTED: equilibrative nucleoside transporter 2-like isoform X1 [Oreochromis niloticus]
frmd6	516	112	5.49869	1.19291	0	-2.23593	down	--	--	Cellular Component: cytoskeleton (GO:0005856);;	K16822|0|mze:101476358|FERM domain-containing protein 6-like; K16822 FERM domain-containing protein 6 (A)	--	--	T	Signal transduction mechanisms	PREDICTED: FERM domain-containing protein 6 [Oreochromis niloticus]
LOC100692037	521	179	4.62161	1.59549	9.31466e-10	-1.58151	down	--	--	Molecular Function: calcium ion binding (GO:0005509);; Biological Process: homophilic cell adhesion via plasma membrane adhesion molecules (GO:0007156);; Cellular Component: integral component of membrane (GO:0016021);;	--	--	--	W	Extracellular structures	PREDICTED: calsyntenin-2-like [Oreochromis niloticus]
pbld	109	271	5.51284	12.6059	9.24651e-05	1.25194	up	[R]	General function prediction only	Molecular Function: catalytic activity (GO:0003824);; Biological Process: biosynthetic process (GO:0009058);;	--	--	--	R	General function prediction only	PREDICTED: phenazine biosynthesis-like domain-containing protein 2-like [Oreochromis niloticus]
nr2c2ap	181	383	13.0172	28.3679	0.00151926	1.0253	up	--	--	Cellular Component: nucleus (GO:0005634);; Biological Process: cell adhesion (GO:0007155);;	--	--	Nuclear receptor 2C2-associated protein GN=nr2c2ap OS=Danio rerio (Zebrafish) PE=2 SV=1	K	Transcription	PREDICTED: nuclear receptor 2C2-associated protein-like isoform X2 [Oreochromis niloticus]
LOC100709899	1593	3585	64.7025	136.427	8.59094e-06	1.12006	up	--	--	Molecular Function: serine-type endopeptidase inhibitor activity (GO:0004867);;	K13963|0|mze:101472627|leukocyte elastase inhibitor-like; K13963 serpin B (A)	--	Leukocyte elastase inhibitor GN=serpinb1 OS=Xenopus tropicalis (Western clawed frog) PE=2 SV=1	V	Defense mechanisms	PREDICTED: leukocyte elastase inhibitor-like [Oreochromis niloticus]
LOC100695448	248	95	4.36285	1.60816	5.11743e-06	-1.4175	down	[P]	Inorganic ion transport and metabolism	Biological Process: sulfate assimilation (GO:0000103);; Molecular Function: adenylylsulfate kinase activity (GO:0004020);; Molecular Function: sulfate adenylyltransferase (ATP) activity (GO:0004781);; Molecular Function: ATP binding (GO:0005524);;	K13811|0|mze:101464984|bifunctional 3'-phosphoadenosine 5'-phosphosulfate synthase 2-like; K13811 3'-phosphoadenosine 5'-phosphosulfate synthase [EC:2.7.7.4 2.7.1.25] (A)	ko00230:Purine metabolism;ko00450:Selenocompound metabolism;ko00920:Sulfur metabolism	--	F	Nucleotide transport and metabolism	PREDICTED: bifunctional 3&apos;-phosphoadenosine 5&apos;-phosphosulfate synthase 2 [Oreochromis niloticus]
LOC102078843	272	129	7.86343	3.11959	0.000804659	-1.1153	down	--	--	--	--	--	--	T	Signal transduction mechanisms	PREDICTED: uncharacterized protein LOC102078843 [Oreochromis niloticus]
tex26	32	141	1.04213	4.99837	4.02047e-08	2.0348	up	--	--	--	--	--	--	S	Function unknown	PREDICTED: uncharacterized protein LOC102075785 isoform X1 [Oreochromis niloticus]
myog	59	0	1.87557	0	1.46227e-12	-5.1941	down	--	--	Molecular Function: DNA binding (GO:0003677);; Cellular Component: nucleus (GO:0005634);; Biological Process: regulation of transcription, DNA-templated (GO:0006355);; Biological Process: response to stress (GO:0006950);; Biological Process: skeletal muscle tissue development (GO:0007519);; Molecular Function: protein dimerization activity (GO:0046983);;	K18483|1.42671e-117|xma:102220428|myogenin-like; K18483 myogenic factor 4 (myogenin) (A)	--	Myogenin GN=MYOG OS=Gallus gallus (Chicken) PE=2 SV=1	K	Transcription	myogenin [Oreochromis niloticus]
papd7	187	393	2.89765	6.04445	0.00168349	1.01569	up	[L]	Replication, recombination and repair	--	K03514|0|mze:101475088|DNA polymerase sigma-like; K03514 non-canonical poly(A) RNA polymerase PAPD5/7 [EC:2.7.7.19] (A)	ko03018:RNA degradation	--	L	Replication, recombination and repair	PREDICTED: DNA polymerase sigma-like [Oreochromis niloticus]
LOC100709111	187	80	1.40468	0.608103	0.000446881	-1.25646	down	--	--	Cellular Component: intracellular (GO:0005622);; Biological Process: signal transduction (GO:0007165);;	--	--	Rho GTPase-activating protein 21-B GN=arhgap21-b OS=Xenopus laevis (African clawed frog) PE=2 SV=1	T	Signal transduction mechanisms	PREDICTED: rho GTPase-activating protein 6-like isoform X1 [Oreochromis niloticus]
LOC102078426	633	310	4.75379	2.39056	0.000134392	-1.07511	down	[O]	Posttranslational modification, protein turnover, chaperones	--	--	--	Fidgetin GN=fign OS=Danio rerio (Zebrafish) PE=2 SV=1	O	Posttranslational modification, protein turnover, chaperones	PREDICTED: fidgetin-like [Oreochromis niloticus]
cobl	566	47	3.58612	0.294467	0	-3.59195	down	--	--	--	K18623|0|mze:101470773|protein cordon-bleu-like; K18623 protein cordon-bleu (A)	--	Protein cordon-bleu GN=cobl OS=Danio rerio (Zebrafish) PE=1 SV=2	Z	Cytoskeleton	PREDICTED: protein cordon-bleu-like isoform X1 [Oreochromis niloticus]
isoc2	323	807	20.5341	50.7969	8.91328e-07	1.26736	up	--	--	Molecular Function: sequence-specific DNA binding transcription factor activity (GO:0003700);; Molecular Function: catalytic activity (GO:0003824);; Cellular Component: nucleus (GO:0005634);; Cellular Component: mitochondrion (GO:0005739);; Biological Process: regulation of transcription, DNA-templated (GO:0006355);; Molecular Function: sequence-specific DNA binding (GO:0043565);;	--	--	Isochorismatase domain-containing protein 2, mitochondrial (Precursor) GN=isoc2 OS=Danio rerio (Zebrafish) PE=2 SV=1	R	General function prediction only	PREDICTED: isochorismatase domain-containing protein 2, mitochondrial-like [Oreochromis niloticus]
ttc7a	125	27	1.4745	0.25159	9.9587e-09	-2.19043	down	--	--	--	--	--	--	T	Signal transduction mechanisms	PREDICTED: tetratricopeptide repeat protein 7A [Oreochromis niloticus]
LOC100703685	325	100	6.10426	1.85594	7.08733e-10	-1.73261	down	--	--	Molecular Function: sequence-specific DNA binding transcription factor activity (GO:0003700);; Cellular Component: nucleus (GO:0005634);; Biological Process: regulation of transcription, DNA-templated (GO:0006355);; Molecular Function: sequence-specific DNA binding (GO:0043565);;	K04448|0|mze:101472459|transcription factor AP-1-like; K04448 transcription factor AP-1 (A)	ko04010:MAPK signaling pathway;ko04012:ErbB signaling pathway;ko04310:Wnt signaling pathway;ko04510:Focal adhesion;ko04620:Toll-like receptor signaling pathway;ko04912:GnRH signaling pathway;ko05132:Salmonella infection;ko05168:Herpes simplex infection	Transcription factor AP-1 GN=JUN OS=Serinus canaria (Island canary) PE=2 SV=1	K	Transcription	PREDICTED: transcription factor AP-1-like [Oreochromis niloticus]
LOC100534480	285	142	5.1998	2.70421	0.00223187	-1.04547	down	--	--	Molecular Function: sequence-specific DNA binding transcription factor activity (GO:0003700);; Cellular Component: nucleus (GO:0005634);; Biological Process: regulation of transcription, DNA-templated (GO:0006355);; Molecular Function: sequence-specific DNA binding (GO:0043565);;	--	--	--	K	Transcription	PREDICTED: cAMP-responsive element modulator isoform X1 [Oreochromis niloticus]
LOC100692715	11	53	0.145855	0.734068	0.00126772	2.06264	up	[P]	Inorganic ion transport and metabolism	--	K04881|0|mze:101485468|potassium voltage-gated channel subfamily A member 10-like; K04881 potassium voltage-gated channel Shaker-related subfamily A member 10 (A)	--	Potassium voltage-gated channel subfamily A member 10 GN=KCNA10 OS=Gallus gallus (Chicken) PE=2 SV=1	P	Inorganic ion transport and metabolism	PREDICTED: potassium voltage-gated channel subfamily A member 10-like [Oreochromis niloticus]
LOC100693492	5963	1046	1001.78	170.717	0	-2.55855	down	[B]	Chromatin structure and dynamics	Cellular Component: nucleosome (GO:0000786);; Molecular Function: DNA binding (GO:0003677);; Cellular Component: nucleus (GO:0005634);; Biological Process: DNA repair (GO:0006281);; Biological Process: DNA recombination (GO:0006310);; Biological Process: nucleosome assembly (GO:0006334);; Biological Process: meiotic nuclear division (GO:0007126);; Biological Process: killing of cells of other org…	K11251|8.68343e-70|mze:101468708|histone H2A-like; K11251 histone H2A (A)	--	Histone H2A OS=Oncorhynchus mykiss (Rainbow trout) PE=1 SV=2	B	Chromatin structure and dynamics	PREDICTED: histone H2A-like [Oreochromis niloticus]
LOC100699203	602	301	18.5743	10.7612	0.000286974	-1.04513	down	--	--	Biological Process: transport (GO:0006810);;	--	--	--	U	Intracellular trafficking, secretion, and vesicular transport	PREDICTED: coatomer subunit zeta-2-like isoform X1 [Oreochromis niloticus]
LOC100708010	40	7	0.231953	0.0435343	0.00210265	-2.30641	down	--	--	--	K04594|0|mze:101483819|latrophilin-3-like; K04594 latrophilin 3 (A)	--	Noelin (Precursor) GN=OLFM1 OS=Gallus gallus (Chicken) PE=2 SV=1	W	Extracellular structures	PREDICTED: latrophilin-3-like isoform X1 [Maylandia zebra]
LOC100692948	199	95	5.00539	2.72852	0.00347622	-1.10228	down	--	--	--	--	--	--	S	Function unknown	PREDICTED: bcl10-interacting CARD protein-like [Oreochromis niloticus]
sdhaf1	280	582	5.04955	11.4689	0.000869047	1.00197	up	--	--	--	K18167|2.61651e-49|mze:101475131|succinate dehydrogenase assembly factor 1, mitochondrial-like; K18167 succinate dehydrogenase assembly factor 1 (A)	--	--	S	Function unknown	PREDICTED: succinate dehydrogenase assembly factor 1, mitochondrial-like isoform X1 [Oreochromis niloticus]
LOC100692068	539	225	12.7266	5.34522	1.07111e-06	-1.30319	down	--	--	Molecular Function: calmodulin binding (GO:0005516);;	K13536|6.43075e-16|mze:101481486|MARCKS-related protein-like; K13536 MARCKS-related protein (A)	--	--	S	Function unknown	PREDICTED: MARCKS-related protein-like [Pundamilia nyererei]
atp11a	15	124	0.0922478	0.766111	2.66887e-12	2.8666	up	[P]	Inorganic ion transport and metabolism	--	K01530|0|mze:101483867|probable phospholipid-transporting ATPase IH-like; K01530 phospholipid-translocating ATPase [EC:3.6.3.1] (A)	--	Phospholipid-transporting ATPase IC GN=atp8b1 OS=Xenopus tropicalis (Western clawed frog) PE=2 SV=1	P	Inorganic ion transport and metabolism	PREDICTED: probable phospholipid-transporting ATPase IH-like isoform X1 [Oreochromis niloticus]
LOC100709438	187	542	5.35219	16.1506	1.79035e-08	1.47773	up	--	--	Molecular Function: calcium ion binding (GO:0005509);; Cellular Component: integral component of membrane (GO:0016021);; Biological Process: transmembrane transport (GO:0055085);;	K14684|0|mze:101478509|calcium-binding mitochondrial carrier protein SCaMC-2-B-like; K14684 solute carrier family 25 (mitochondrial phosphate transporter), member 23/24/25/41 (A)	--	Calcium-binding mitochondrial carrier protein SCaMC-1-A GN=slc25a24-a OS=Xenopus laevis (African clawed frog) PE=2 SV=2	C	Energy production and conversion	PREDICTED: calcium-binding mitochondrial carrier protein SCaMC-1-A-like isoform X1 [Oreochromis niloticus]
LOC100702714	192	28	9.39953	1.44658	4.44089e-16	-2.75362	down	--	--	Cellular Component: endoplasmic reticulum (GO:0005783);; Biological Process: intracellular protein transport (GO:0006886);; Cellular Component: integral component of membrane (GO:0016021);;	--	--	--	U	Intracellular trafficking, secretion, and vesicular transport	PREDICTED: B-cell receptor-associated protein 29-like [Oreochromis niloticus]
LOC100701554	134	19	1.75559	0.286858	7.71161e-13	-2.7606	down	[E]	Amino acid transport and metabolism	Biological Process: amino acid transmembrane transport (GO:0003333);; Molecular Function: amino acid transmembrane transporter activity (GO:0015171);; Cellular Component: integral component of membrane (GO:0016021);;	K13863|0|mze:101473805|high affinity cationic amino acid transporter 1-like; K13863 solute carrier family 7 (cationic amino acid transporter), member 1 (A)	--	Cationic amino acid transporter 2 GN=SLC7A2 OS=Gallus gallus (Chicken) PE=2 SV=1	E	Amino acid transport and metabolism	PREDICTED: high affinity cationic amino acid transporter 1-like isoform X2 [Oreochromis niloticus]
orni-dba	15	108	1.59557	11.6494	4.0898e-10	2.67021	up	--	--	Biological Process: antigen processing and presentation of peptide or polysaccharide antigen via MHC class II (GO:0002504);; Biological Process: immune response (GO:0006955);; Cellular Component: integral component of membrane (GO:0016021);; Cellular Component: MHC class II protein complex (GO:0042613);;	K06752|3.34502e-159|mze:101484336|h-2 class II histocompatibility antigen, E-U alpha chain-like; K06752 major histocompatibility complex, class II (A)	ko04145:Phagosome;ko04514:Cell adhesion molecules (CAMs);ko04672:Intestinal immune network for IgA production;ko05168:Herpes simplex infection	Beta-2-microglobulin (Precursor) GN=b2m OS=Ictalurus punctatus (Channel catfish) PE=3 SV=1	R	General function prediction only	mamu class II histocompatibility antigen, DR alpha chain-like precursor [Oreochromis niloticus]
ndrg1	1425	402	26.4202	7.58278	2.22045e-16	-1.87059	down	--	--	--	K18266|0|mze:101477071|protein NDRG1-like; K18266 protein NDRG1 (A)	--	Protein NDRG1 OS=Xenopus tropicalis (Western clawed frog) PE=2 SV=1	S	Function unknown	PREDICTED: protein NDRG1-like isoform 1 [Oreochromis niloticus]
LOC100705077	27	0	1.03762	0	7.62408e-05	-4.11231	down	--	--	--	--	--	--	636	Function unknown	PREDICTED: uncharacterized protein LOC100705077 isoform X1 [Oreochromis niloticus]
LOC102075804	182	79	6.97688	3.25768	0.00071246	-1.23547	down	--	--	--	--	--	--	S	Function unknown	PREDICTED: coxsackievirus and adenovirus receptor homolog [Oreochromis niloticus]
LOC100695216	248	568	10.6199	26.3772	4.93836e-05	1.14094	up	--	--	--	K09655|0|mze:101475242|beta-1,4 N-acetylgalactosaminyltransferase 2-like; K09655 beta-1,4-N-acetylgalactosaminyltransferase 2 [EC:2.4.1.-] (A)	--	--	O	Posttranslational modification, protein turnover, chaperones	PREDICTED: beta-1,4 N-acetylgalactosaminyltransferase 2-like isoform X1 [Oreochromis niloticus]
LOC102078368	0	42	3.55784e-07	0.579798	4.35466e-08	4.67218	up	--	--	--	K17592|0|mze:101467601|sacsin-like; K17592 sacsin (A)	--	--	R	General function prediction only	PREDICTED: sacsin-like [Maylandia zebra]
clg13h7orf72	23	121	0.370616	1.98843	1.15432e-08	2.26589	up	--	--	--	--	--	--	332	Function unknown	PREDICTED: uncharacterized protein C7orf72-like isoform X1 [Oreochromis niloticus]
LOC100692424	91	13	1.17203	0.171977	2.151e-09	-2.70401	down	--	--	Cellular Component: cytoplasm (GO:0005737);; Cellular Component: cytoskeleton (GO:0005856);; Molecular Function: cytoskeletal protein binding (GO:0008092);; Cellular Component: extrinsic component of membrane (GO:0019898);; Biological Process: cell migration involved in gastrulation (GO:0042074);;	K08007|0|mze:101468243|ezrin-like; K08007 villin 2 (ezrin) (A)	ko04810:Regulation of actin cytoskeleton	Radixin GN=RDX OS=Gallus gallus (Chicken) PE=2 SV=1	R	General function prediction only	PREDICTED: ezrin [Oreochromis niloticus]
LOC100706459	181	466	3.46076	9.09241	2.36406e-06	1.30714	up	--	--	--	K18618|0|mze:101481278|growth arrest-specific protein 7-like; K18618 growth arrest-specific protein 7 (A)	--	--	Z	Cytoskeleton	PREDICTED: growth arrest-specific protein 7-like isoform X3 [Oreochromis niloticus]
tmem30a	1387	693	22.0579	11.5244	7.76407e-05	-1.04855	down	--	--	Cellular Component: membrane (GO:0016020);;	--	--	Cell cycle control protein 50A GN=TMEM30A OS=Gallus gallus (Chicken) PE=2 SV=1	T	Signal transduction mechanisms	PREDICTED: cell cycle control protein 50A-like isoform 1 [Oreochromis niloticus]
grb14	245	79	5.17363	1.72163	4.42695e-08	-1.66096	down	--	--	Molecular Function: phospholipid binding (GO:0005543);; Biological Process: signal transduction (GO:0007165);;	--	--	Amyloid beta A4 precursor protein-binding family B member 1-interacting protein GN=APBB1IP OS=Gallus gallus (Chicken) PE=2 SV=1	T	Signal transduction mechanisms	PREDICTED: growth factor receptor-bound protein 14 isoform X2 [Oreochromis niloticus]
LOC100711238	73	446	0.671985	3.52152	0	2.53488	up	--	--	--	--	--	--	T	Signal transduction mechanisms	PREDICTED: disabled homolog 2-interacting protein-like [Oreochromis niloticus]
Tilapia_newGene_221	353	176	12.8228	8.00482	0.00111579	-1.04622	down	--	--	--	--	--	--	--	--	PREDICTED: uncharacterized protein LOC101485141 [Maylandia zebra]
LOC102082521	2	54	0.082247	1.85645	9.98973e-09	3.88	up	--	--	--	--	--	--	868	Function unknown	PREDICTED: uncharacterized protein LOC102082521 [Oreochromis niloticus]
LOC100696905	262	18	4.59132	0.117936	0	-3.79068	down	[O]	Posttranslational modification, protein turnover, chaperones	Molecular Function: peptidase activity (GO:0008233);;	K08654|0|mze:101478025|proprotein convertase subtilisin/kexin type 5-like; K08654 proprotein convertase subtilisin/kexin type 5 [EC:3.4.21.-] (A)	--	Furin-1 (Precursor) GN=furin OS=Xenopus laevis (African clawed frog) PE=2 SV=1	O	Posttranslational modification, protein turnover, chaperones	PREDICTED: proprotein convertase subtilisin/kexin type 5-like [Oreochromis niloticus]
LOC100690717	674	1	23.2701	0.0581433	0	-8.00877	down	[V]	Defense mechanisms	Biological Process: drug transmembrane transport (GO:0006855);; Molecular Function: drug transmembrane transporter activity (GO:0015238);; Molecular Function: antiporter activity (GO:0015297);; Cellular Component: membrane (GO:0016020);;	K03327|0|mze:101470630|multidrug and toxin extrusion protein 1-like; K03327 multidrug resistance protein, MATE family (A)	--	Multidrug and toxin extrusion protein 1 GN=slc47a1 OS=Danio rerio (Zebrafish) PE=2 SV=1	S	Function unknown	PREDICTED: multidrug and toxin extrusion protein 1-like isoform X1 [Oreochromis niloticus]
LOC100696885	38	181	1.01282	4.58867	2.02309e-10	2.15459	up	--	--	Molecular Function: carbohydrate binding (GO:0030246);;	--	--	Hepatic lectin OS=Gallus gallus (Chicken) PE=1 SV=1	V	Defense mechanisms	PREDICTED: C-type lectin domain family 10 member A-like [Oreochromis niloticus]
LOC100690579	672	338	2.99345	1.62784	0.000273506	-1.03705	down	--	--	--	K08622|0|mze:101470435|A disintegrin and metalloproteinase with thrombospondin motifs 7-like; K08622 a disintegrin and metalloproteinase with thrombospondin motifs 7 [EC:3.4.24.-] (A)	--	Snake venom metalloproteinase atrolysin-D (Precursor) OS=Crotalus atrox (Western diamondback rattlesnake) PE=1 SV=3	O	Posttranslational modification, protein turnover, chaperones	PREDICTED: A disintegrin and metalloproteinase with thrombospondin motifs 7-like [Oreochromis niloticus]
LOC102077454	81	10	5.72641	0.710147	2.98495e-09	-2.86819	down	--	--	Biological Process: gene expression (GO:0010467);; Biological Process: single-organism cellular process (GO:0044763);;	--	--	N-lysine methyltransferase SETD8-A GN=setd8a OS=Danio rerio (Zebrafish) PE=2 SV=1	--	--	PREDICTED: N-lysine methyltransferase SETD8-A-like [Oreochromis niloticus]
ackr4	114	33	1.91857	0.581472	8.27158e-06	-1.78559	down	--	--	Molecular Function: G-protein coupled receptor activity (GO:0004930);; Biological Process: signal transduction (GO:0007165);; Cellular Component: membrane (GO:0016020);;	K04186|0|mze:101486955|c-C chemokine receptor type 11-like; K04186 C-C chemokine receptor-like 1 (A)	--	C-X-C chemokine receptor type 4-B GN=cxcr4-b OS=Xenopus laevis (African clawed frog) PE=2 SV=1	T	Signal transduction mechanisms	PREDICTED: c-C chemokine receptor type 11-like [Oreochromis niloticus]
LOC100697078	208	38	1.10632	0.190409	3.24185e-14	-2.44965	down	--	--	--	K16353|0|mze:101482457|protein sidekick-2-like; K16353 protein sidekick (A)	--	Protein sidekick-2 (Precursor) GN=SDK2 OS=Gallus gallus (Chicken) PE=2 SV=2	T	Signal transduction mechanisms	PREDICTED: protein sidekick-2-like isoform X2 [Oreochromis niloticus]
vps41	1604	3926	23.9912	58.8718	2.42141e-07	1.24117	up	--	--	Biological Process: intracellular protein transport (GO:0006886);; Molecular Function: zinc ion binding (GO:0008270);; Biological Process: vesicle-mediated transport (GO:0016192);;	--	--	--	U	Intracellular trafficking, secretion, and vesicular transport	PREDICTED: vacuolar protein sorting-associated protein 41 homolog [Oreochromis niloticus]
slc35f2	355	155	7.84687	3.6553	2.76398e-05	-1.23575	down	[GER]	--	Biological Process: transport (GO:0006810);; Cellular Component: integral component of membrane (GO:0016021);;	K15287|0|mze:101466242|solute carrier family 35 member F2-like; K15287 solute carrier family 35, member F1/2 (A)	--	Solute carrier family 35 member F2 GN=slc35f2 OS=Xenopus tropicalis (Western clawed frog) PE=2 SV=2	S	Function unknown	PREDICTED: solute carrier family 35 member F2-like [Oreochromis niloticus]
LOC100698051	108	45	1.02083	0.436683	0.00665855	-1.28041	down	--	--	--	--	--	Immunoglobulin-like domain-containing receptor 1 (Precursor) GN=ildr1 OS=Xenopus laevis (African clawed frog) PE=2 SV=1	T	Signal transduction mechanisms	PREDICTED: immunoglobulin-like domain-containing receptor 2-like isoform X1 [Oreochromis niloticus]
fmnl2	448	149	6.04909	1.25261	7.62904e-10	-1.62636	down	--	--	Molecular Function: actin binding (GO:0003779);; Molecular Function: Rho GTPase binding (GO:0017048);; Biological Process: regulation of cell morphogenesis (GO:0022604);; Biological Process: actin cytoskeleton organization (GO:0030036);;	--	--	--	Z	Cytoskeleton	PREDICTED: formin-like protein 2-like isoform X2 [Oreochromis niloticus]
atp5o	2506	5328	182.885	382.514	8.26356e-05	1.03836	up	[C]	Energy production and conversion	Biological Process: ATP catabolic process (GO:0006200);; Biological Process: ATP synthesis coupled proton transport (GO:0015986);; Molecular Function: proton-transporting ATP synthase activity, rotational mechanism (GO:0046933);;	K02137|7.96934e-139|mze:101487306|ATP synthase subunit O, mitochondrial-like; K02137 F-type H+-transporting ATPase subunit O (A)	ko00190:Oxidative phosphorylation	--	C	Energy production and conversion	PREDICTED: ATP synthase subunit O, mitochondrial-like [Oreochromis niloticus]
gria1	302	149	2.63383	1.42466	0.00143632	-1.05998	down	--	--	Molecular Function: ionotropic glutamate receptor activity (GO:0004970);; Molecular Function: extracellular-glutamate-gated ion channel activity (GO:0005234);; Cellular Component: plasma membrane (GO:0005886);; Biological Process: ion transport (GO:0006811);; Cellular Component: integral component of membrane (GO:0016021);; Cellular Component: cell junction (GO:0030054);; Biological Process: iono…	K05197|0|mze:101467141|glutamate receptor 1-like; K05197 glutamate receptor 1 (A)	ko04080:Neuroactive ligand-receptor interaction	Probable glutamate receptor (Precursor) OS=Lithobates berlandieri (Rio Grande leopard frog) PE=1 SV=1	T	Signal transduction mechanisms	PREDICTED: glutamate receptor 1-like isoformX1 [Oreochromis niloticus]
LOC100702789	104	30	2.0289	0.647035	2.01892e-05	-1.78552	down	--	--	--	--	--	V-set and transmembrane domain-containing protein 2B (Precursor) GN=vstm2b OS=Xenopus tropicalis (Western clawed frog) PE=2 SV=1	T	Signal transduction mechanisms	PREDICTED: V-set and transmembrane domain-containing protein 2-like protein-like [Oreochromis niloticus]
LOC100697795	204	73	3.00752	1.10268	3.61849e-06	-1.51013	down	[R]	General function prediction only	Molecular Function: neurotransmitter:sodium symporter activity (GO:0005328);; Biological Process: neurotransmitter transport (GO:0006836);; Cellular Component: integral component of membrane (GO:0016021);;	K05039|0|mze:101473935|sodium- and chloride-dependent creatine transporter 1-like; K05039 solute carrier family 6 (neurotransmitter transporter, GABA) member 6/8/11/12/13 (A)	--	Creatine transporter OS=Torpedo marmorata (Marbled electric ray) PE=2 SV=1	P	Inorganic ion transport and metabolism	PREDICTED: sodium- and chloride-dependent creatine transporter 1-like [Oreochromis niloticus]
LOC100707612	966	2773	15.376	51.5445	1.70343e-10	1.47042	up	[E]	Amino acid transport and metabolism	Biological Process: amino acid transmembrane transport (GO:0003333);; Molecular Function: amino acid transmembrane transporter activity (GO:0015171);; Cellular Component: integral component of membrane (GO:0016021);;	K13867|0|mze:101486394|Y+L amino acid transporter 1-like; K13867 solute carrier family 7 (L-type amino acid transporter), member 7 (A)	--	Y+L amino acid transporter 2 OS=Danio rerio (Zebrafish) PE=2 SV=1	E	Amino acid transport and metabolism	PREDICTED: Y+L amino acid transporter 1-like isoform X1 [Oreochromis niloticus]
LOC102081097	193	486	1.85746	4.52337	4.0619e-06	1.27575	up	--	--	--	--	--	--	S	Function unknown	PREDICTED: uncharacterized protein LOC102081097 [Oreochromis niloticus]
pah	3	53	0.0872428	1.21585	1.00973e-07	3.50512	up	[E]	Amino acid transport and metabolism	Molecular Function: phenylalanine 4-monooxygenase activity (GO:0004505);; Molecular Function: tryptophan 5-monooxygenase activity (GO:0004510);; Molecular Function: iron ion binding (GO:0005506);; Biological Process: L-phenylalanine catabolic process (GO:0006559);; Molecular Function: amino acid binding (GO:0016597);; Biological Process: response to chemical (GO:0042221);; Biological Process: oxi…	K00500|0|mze:101478105|phenylalanine-4-hydroxylase-like; K00500 phenylalanine-4-hydroxylase [EC:1.14.16.1] (A)	ko00360:Phenylalanine metabolism;ko00400:Phenylalanine, tyrosine and tryptophan biosynthesis;ko01230:Biosynthesis of amino acids	Tryptophan 5-hydroxylase 1 GN=TPH1 OS=Gallus gallus (Chicken) PE=1 SV=1	E	Amino acid transport and metabolism	PREDICTED: tryptophan hydroxylase isoform X1 [Oreochromis niloticus]
LOC102080719	164	62	8.20039	2.92004	6.9301e-05	-1.42786	down	--	--	--	--	--	--	--	--	PREDICTED: B-cell receptor CD22-like [Oreochromis niloticus]
LOC100694759	256	99	1.83863	0.692053	5.36018e-06	-1.40453	down	--	--	Molecular Function: DNA binding (GO:0003677);; Biological Process: regulation of transcription, DNA-templated (GO:0006355);; Biological Process: multicellular organismal development (GO:0007275);;	K09269|0|mze:101470959|transcription factor SOX-6-like; K09269 transcription factor SOX5/6/13 (SOX group D) (A)	--	Transcription factor Sox-6 {ECO:0000312|EMBL:AAI61247.1} GN=sox6 OS=Xenopus tropicalis (Western clawed frog) PE=2 SV=1	K	Transcription	PREDICTED: transcription factor SOX-6-like isoform X4 [Oreochromis niloticus]
tjp1	0	73	1.13596e-05	0.402444	9.10383e-15	5.44546	up	--	--	--	K05701|0|mze:101471045|tight junction protein ZO-1-like; K05701 tight junction protein 1 (A)	ko04520:Adherens junction;ko04530:Tight junction;ko04540:Gap junction;ko05132:Salmonella infection	Discs large homolog 1-like protein GN=dlg1l OS=Danio rerio (Zebrafish) PE=2 SV=1	T	Signal transduction mechanisms	PREDICTED: tight junction protein ZO-1-like isoform X2 [Oreochromis niloticus]
LOC100711646	925	2386	34.3746	81.552	3.1256e-08	1.31617	up	--	--	--	--	--	--	A	RNA processing and modification	PREDICTED: uncharacterized protein LOC100711646 isoform X2 [Oreochromis niloticus]
LOC100693653	106	291	1.07952	2.92861	4.25101e-06	1.3937	up	--	--	--	--	--	FTS and Hook-interacting protein homolog GN=fam160a2 OS=Danio rerio (Zebrafish) PE=3 SV=1	S	Function unknown	PREDICTED: protein FAM160A1-like [Oreochromis niloticus]
LOC100707733	955	483	25.1905	11.6474	0.000181141	-1.03022	down	--	--	Biological Process: response to bacterium (GO:0009617);;	--	--	--	--	--	PREDICTED: angiopoietin-related protein 4-like isoform X1 [Oreochromis niloticus]
zbtb7a	145	54	0.711751	0.281995	0.000125157	-1.44567	down	[R]	General function prediction only	Molecular Function: nucleic acid binding (GO:0003676);; Cellular Component: nucleus (GO:0005634);; Molecular Function: metal ion binding (GO:0046872);;	K10494|0|mze:101478683|zinc finger and BTB domain-containing protein 7A-like; K10494 zinc finger and BTB domain-containing protein 7 (A)	--	Zinc finger and BTB domain-containing protein 7A GN=ZBTB7A OS=Gallus gallus (Chicken) PE=2 SV=1	R	General function prediction only	PREDICTED: zinc finger and BTB domain-containing protein 7A-like isoform X2 [Oreochromis niloticus]
cdc14b	334	158	6.14525	2.98947	0.000337023	-1.12085	down	[T]	Signal transduction mechanisms	--	K06639|0|mze:101482502|dual specificity protein phosphatase CDC14A-like; K06639 cell division cycle 14 [EC:3.1.3.16 3.1.3.48] (A)	ko04110:Cell cycle	Protein tyrosine phosphatase domain-containing protein 1 GN=ptpdc1 OS=Danio rerio (Zebrafish) PE=2 SV=1	V	Defense mechanisms	PREDICTED: dual specificity protein phosphatase CDC14A-like isoform X1 [Oreochromis niloticus]
gpam	297	132	2.64482	1.24457	0.000103316	-1.20869	down	[I]	Lipid transport and metabolism	Molecular Function: glycerol-3-phosphate O-acyltransferase activity (GO:0004366);; Biological Process: phospholipid biosynthetic process (GO:0008654);; Cellular Component: membrane (GO:0016020);;	K00629|0|mze:101480029|glycerol-3-phosphate acyltransferase 1, mitochondrial-like; K00629 glycerol-3-phosphate O-acyltransferase 1/2 [EC:2.3.1.15] (A)	ko00561:Glycerolipid metabolism;ko00564:Glycerophospholipid metabolism	--	I	Lipid transport and metabolism	PREDICTED: glycerol-3-phosphate acyltransferase 1, mitochondrial-like isoform X1 [Oreochromis niloticus]
arl4a	419	172	6.08789	2.881	1.87938e-06	-1.32528	down	[R]	General function prediction only	Molecular Function: GTP binding (GO:0005525);; Cellular Component: intracellular (GO:0005622);; Biological Process: small GTPase mediated signal transduction (GO:0007264);;	K07945|6.73618e-121|mze:101471987|ADP-ribosylation factor-like protein 4A-like; K07945 ADP-ribosylation factor-like protein 4 (A)	--	ADP-ribosylation factor 5 GN=ARF5 OS=Gallus gallus (Chicken) PE=2 SV=2	U	Intracellular trafficking, secretion, and vesicular transport	PREDICTED: ADP-ribosylation factor-like protein 4A-like isoform X1 [Oreochromis niloticus]
myocd	368	170	2.38312	1.11815	0.000121027	-1.15553	down	--	--	--	--	--	Myocardin-related transcription factor B GN=mrtfb OS=Xenopus laevis (African clawed frog) PE=2 SV=1	K	Transcription	PREDICTED: myocardin-like isoform X1 [Oreochromis niloticus]
sema7a	255	88	2.65804	0.999368	2.22485e-07	-1.56578	down	--	--	Cellular Component: membrane (GO:0016020);;	K06529|0|mze:101472248|semaphorin-7A-like; K06529 semaphorin 7 (A)	--	Semaphorin-3C (Precursor) GN=SEMA3C OS=Gallus gallus (Chicken) PE=2 SV=1	T	Signal transduction mechanisms	PREDICTED: semaphorin-7A-like [Oreochromis niloticus]
LOC100703692	446	169	7.32009	2.77957	9.01783e-08	-1.44016	down	--	--	Molecular Function: DNA binding (GO:0003677);; Cellular Component: nucleus (GO:0005634);; Biological Process: negative regulation of transcription, DNA-templated (GO:0045892);; Molecular Function: protein dimerization activity (GO:0046983);;	K03729|0|mze:101463600|class E basic helix-loop-helix protein 40-like; K03729 class B basic helix-loop-helix protein 2 (A)	--	Hairy and enhancer of split-related protein helt GN=helt OS=Danio rerio (Zebrafish) PE=2 SV=1	K	Transcription	PREDICTED: class E basic helix-loop-helix protein 40-like isoform 2 [Oreochromis niloticus]
LOC100701053	105	39	2.75557	1.11616	0.00127056	-1.43872	down	--	--	Cellular Component: membrane (GO:0016020);;	K06509|5.42206e-126|mze:101480351|CD82 antigen-like; K06509 CD82 antigen (A)	ko04115:p53 signaling pathway	Tetraspanin-9 GN=tspan9 OS=Xenopus tropicalis (Western clawed frog) PE=2 SV=1	R	General function prediction only	PREDICTED: CD82 antigen-like isoform X2 [Oreochromis niloticus]
LOC100702455	28	3	1.05889	0.11218	0.00702392	-2.70252	down	--	--	Cellular Component: membrane (GO:0016020);;	K17286|0|mze:101474847|erythrocyte band 7 integral membrane protein-like; K17286 erythrocyte band 7 integral membrane protein (A)	--	--	C	Energy production and conversion	PREDICTED: erythrocyte band 7 integral membrane protein-like [Oreochromis niloticus]
LOC100711081	375	68	4.50915	0.821816	0	-2.48307	down	--	--	Biological Process: vasculogenesis (GO:0001570);; Cellular Component: collagen trimer (GO:0005581);; Cellular Component: integral component of membrane (GO:0016021);; Molecular Function: carbohydrate binding (GO:0030246);; Molecular Function: metal ion binding (GO:0046872);;	K10062|0|mze:101479770|collectin-12-like; K10062 collectin sub-family member 12 (A)	ko04145:Phagosome	Collectin-12 GN=colec12 OS=Danio rerio (Zebrafish) PE=2 SV=1	W	Extracellular structures	PREDICTED: collectin-12-like [Oreochromis niloticus]
LOC100702111	169	12	1.11084	0.0812272	0	-3.68667	down	--	--	--	K13194|0|mze:101472103|double-stranded RNA-specific editase B2-like; K13194 double stranded RNA-specific editase B [EC:3.5.-.-] (A)	--	Adenosine deaminase domain-containing protein 1 GN=adad1 OS=Xenopus laevis (African clawed frog) PE=2 SV=1	A	RNA processing and modification	PREDICTED: double-stranded RNA-specific editase B2 [Oreochromis niloticus]
tyrp1	37	242	0.815311	4.83524	2.22045e-16	2.60704	up	--	--	Molecular Function: copper ion binding (GO:0005507);; Molecular Function: oxidoreductase activity, acting on paired donors, with incorporation or reduction of molecular oxygen, another compound as one donor, and incorporation of one atom of oxygen (GO:0016716);; Cellular Component: melanosome membrane (GO:0033162);; Biological Process: melanin biosynthetic process (GO:0042438);; Biological Proces…	K00506|0|mze:101463840|5,6-dihydroxyindole-2-carboxylic acid oxidase-like; K00506 tyrosinase-related protein 1 [EC:1.14.18.-] (A)	ko00350:Tyrosine metabolism;ko04916:Melanogenesis	5,6-dihydroxyindole-2-carboxylic acid oxidase (Precursor) GN=TYRP1 OS=Gallus gallus (Chicken) PE=2 SV=1	G	Carbohydrate transport and metabolism	PREDICTED: 5,6-dihydroxyindole-2-carboxylic acid oxidase-like [Oreochromis niloticus]
LOC100700459	255	550	3.20925	6.7315	0.000336723	1.05473	up	[L]	Replication, recombination and repair	--	K03514|0|mze:101472871|DNA polymerase sigma-like; K03514 non-canonical poly(A) RNA polymerase PAPD5/7 [EC:2.7.7.19] (A)	ko03018:RNA degradation	--	L	Replication, recombination and repair	PREDICTED: DNA polymerase sigma-like [Oreochromis niloticus]
LOC102082156	76	184	0.993543	2.61487	0.00129625	1.20854	up	[R]	General function prediction only	--	--	--	Gastrula zinc finger protein XlCGF58.1 (Fragment) OS=Xenopus laevis (African clawed frog) PE=3 SV=1	R	General function prediction only	PREDICTED: zinc finger protein 271-like isoform X1 [Oreochromis niloticus]
LOC100707965	66	18	0.476893	0.141686	0.000807921	-1.82833	down	[S]	Function unknown	--	--	--	Leucine-rich repeat-containing G-protein coupled receptor 4 (Precursor) GN=lgr4 OS=Danio rerio (Zebrafish) PE=2 SV=1	R	General function prediction only	PREDICTED: leucine-rich repeat transmembrane neuronal protein 4 [Oreochromis niloticus]
LOC100704946	170	67	14.8936	5.51906	0.00013341	-1.3702	down	--	--	--	--	--	--	--	--	PREDICTED: protein DEPP-like [Oreochromis niloticus]
sult1a4	447	191	9.11286	4.23639	5.13909e-06	-1.2685	down	--	--	Molecular Function: estrone sulfotransferase activity (GO:0004304);;	K01025|0|ola:100125513|sulfotransferase 1 isoform 2; K01025 [EC:2.8.2.-] (A)	--	Sulfotransferase family cytosolic 1B member 1 GN=SULT1B1 OS=Gallus gallus (Chicken) PE=2 SV=1	R	General function prediction only	PREDICTED: sulfotransferase 1C1-like isoform X1 [Oreochromis niloticus]
LOC100710185	12	50	0.67293	2.58748	0.00783178	1.87158	up	--	--	Biological Process: antigen processing and presentation (GO:0019882);; Cellular Component: membrane part (GO:0044425);;	K06752|3.44232e-118|mze:101478765|HLA class II histocompatibility antigen, DP alpha 1 chain-like; K06752 major histocompatibility complex, class II (A)	ko04145:Phagosome;ko04514:Cell adhesion molecules (CAMs);ko04672:Intestinal immune network for IgA production;ko05168:Herpes simplex infection	Beta-2-microglobulin (Precursor) GN=b2m OS=Acipenser baerii (Siberian sturgeon) PE=2 SV=1	R	General function prediction only	PREDICTED: HLA class II histocompatibility antigen, DP alpha 1 chain-like [Oreochromis niloticus]
ar	589	222	4.24648	1.72093	1.68764e-08	-1.45002	down	--	--	Molecular Function: androgen receptor activity (GO:0004882);; Molecular Function: steroid binding (GO:0005496);; Cellular Component: nucleus (GO:0005634);; Biological Process: regulation of transcription, DNA-templated (GO:0006355);; Molecular Function: zinc ion binding (GO:0008270);; Biological Process: androgen receptor signaling pathway (GO:0030521);; Biological Process: steroid hormone mediat…	K08557|0|mze:101465385|androgen receptor-like; K08557 androgen receptor (A)	ko04114:Oocyte meiosis	Androgen receptor GN=ar OS=Lithobates catesbeiana (American bullfrog) PE=2 SV=1	T	Signal transduction mechanisms	androgen receptor beta [Oreochromis niloticus]
LOC100698766	164	33	1.98194	0.425729	2.82762e-11	-2.30394	down	--	--	Molecular Function: endothelin receptor activity (GO:0004962);; Biological Process: G-protein coupled receptor signaling pathway (GO:0007186);; Biological Process: regulation of blood pressure (GO:0008217);; Cellular Component: integral component of membrane (GO:0016021);; Biological Process: vasoconstriction (GO:0042310);; Biological Process: enteric nervous system development (GO:0048484);; Bio…	K04197|0|mze:101468288|endothelin-1 receptor-like; K04197 endothelin receptor type A (A)	ko04020:Calcium signaling pathway;ko04080:Neuroactive ligand-receptor interaction;ko04270:Vascular smooth muscle contraction	Endothelin B receptor (Fragment) GN=EDNRB OS=Coturnix coturnix japonica (Japanese quail) PE=2 SV=1	T	Signal transduction mechanisms	PREDICTED: endothelin-1 receptor-like [Oreochromis niloticus]
slc12a4	217	106	2.49414	1.26346	0.00394902	-1.07081	down	[E]	Amino acid transport and metabolism	Biological Process: ion transport (GO:0006811);; Molecular Function: potassium:chloride symporter activity (GO:0015379);; Cellular Component: integral component of membrane (GO:0016021);; Biological Process: transmembrane transport (GO:0055085);;	K14427|0|mze:101470847|solute carrier family 12 member 4-like; K14427 solute carrier family 12 (potassium/chloride transporter), member 4/5/6 (A)	--	Solute carrier family 12 member 2 GN=SLC12A2 OS=Squalus acanthias (Spiny dogfish) PE=1 SV=1	P	Inorganic ion transport and metabolism	PREDICTED: solute carrier family 12 member 4-like isoformX1 [Oreochromis niloticus]
LOC100696197	100	41	1.62244	0.724686	0.00818389	-1.30026	down	--	--	--	--	--	--	S	Function unknown	PREDICTED: protein HID1-like isoform X3 [Oreochromis niloticus]
Tilapia_newGene_6785	542	0	20.1866	0.0354167	0	-8.35805	down	--	--	--	--	--	--	--	--	PREDICTED: zinc finger protein 420-like [Haplochromis burtoni]
LOC100708912	214	47	5.46799	1.21914	3.473e-12	-2.19567	down	--	--	--	--	--	--	R	General function prediction only	PREDICTED: uncharacterized protein LOC100708912 [Oreochromis niloticus]
LOC100690653	276	138	3.21325	1.89188	0.0027122	-1.04018	down	--	--	--	K14943|0|mze:101474989|muscleblind-like protein 2a-like; K14943 muscleblind (A)	--	Muscleblind-like protein 2a GN=mbnl2a OS=Takifugu rubripes (Japanese pufferfish) PE=2 SV=1	A	RNA processing and modification	PREDICTED: muscleblind-like protein 2a-like isoform X2 [Oreochromis niloticus]
LOC100701390	103	41	0.96408	0.40318	0.00434927	-1.34222	down	[T]	Signal transduction mechanisms	Biological Process: phosphatidylinositol dephosphorylation (GO:0046856);;	K01106|0|mze:101478369|phosphatidylinositol 4,5-bisphosphate 5-phosphatase A-like; K01106 inositol-1,4,5-trisphosphate 5-phosphatase [EC:3.1.3.56] (A)	ko00562:Inositol phosphate metabolism;ko04070:Phosphatidylinositol signaling system	Phosphatidylinositol 3,4,5-trisphosphate 5-phosphatase 2A GN=inppl1a OS=Danio rerio (Zebrafish) PE=2 SV=2	I	Lipid transport and metabolism	PREDICTED: phosphatidylinositol 4,5-bisphosphate 5-phosphatase A-like [Oreochromis niloticus]
LOC100690101	628	126	60.3507	10.8463	0	-2.351	down	--	--	Cellular Component: extracellular region (GO:0005576);; Biological Process: response to freezing (GO:0050826);;	--	--	Type-4 ice-structuring protein (Precursor) OS=Paralichthys olivaceus (Bastard halibut) PE=3 SV=1	221	General function prediction only	PREDICTED: type-4 ice-structuring protein [Oreochromis niloticus]
LOC100702210	673	1509	11.7972	26.1257	1.5815e-05	1.11365	up	--	--	--	K06545|0|mze:101471210|scavenger receptor cysteine-rich type 1 protein M130-like; K06545 CD163 antigen (A)	--	Lysyl oxidase homolog 2A (Precursor) GN=loxl2a OS=Danio rerio (Zebrafish) PE=2 SV=1	--	--	PREDICTED: scavenger receptor cysteine-rich type 1 protein M130-like [Oreochromis niloticus]
crhr2	131	41	5.41711	1.78723	9.00112e-06	-1.68426	down	--	--	Molecular Function: G-protein coupled receptor activity (GO:0004930);; Cellular Component: plasma membrane (GO:0005886);; Biological Process: G-protein coupled receptor signaling pathway (GO:0007186);; Cellular Component: integral component of membrane (GO:0016021);;	K04579|0|mze:101476678|corticotropin-releasing factor receptor 2-like; K04579 corticotropin releasing hormone receptor 2 (A)	ko04080:Neuroactive ligand-receptor interaction	Corticotropin-releasing factor receptor 2 GN=crhr2 OS=Xenopus laevis (African clawed frog) PE=2 SV=1	T	Signal transduction mechanisms	PREDICTED: corticotropin-releasing factor receptor 2-like isoform X1 [Oreochromis niloticus]
LOC100700549	388	126	12.3218	4.3351	9.72375e-10	-1.65864	down	--	--	Molecular Function: structural molecule activity (GO:0005198);; Cellular Component: plasma membrane (GO:0005886);; Cellular Component: tight junction (GO:0005923);; Cellular Component: integral component of membrane (GO:0016021);;	K06087|5.36185e-112|mze:101483902|claudin-11-like; K06087 claudin (A)	ko04514:Cell adhesion molecules (CAMs);ko04530:Tight junction	--	S	Function unknown	PREDICTED: claudin-11-like [Oreochromis niloticus]
LOC102082106	79	13	2.75427	0.413077	1.61947e-07	-2.50391	down	--	--	--	--	--	--	S	Function unknown	PREDICTED: butyrophilin-like protein 2-like [Oreochromis niloticus]
pde7b	844	271	9.33101	3.32162	2.80553e-12	-1.68204	down	--	--	Molecular Function: 3',5'-cyclic-nucleotide phosphodiesterase activity (GO:0004114);; Biological Process: signal transduction (GO:0007165);; Biological Process: metabolic process (GO:0008152);; Molecular Function: metal ion binding (GO:0046872);;	K18436|0|mze:101486166|cAMP-specific 3',5'-cyclic phosphodiesterase 7B-like; K18436 high affinity cAMP-specific 3',5'-cyclic phosphodiesterase 7 [EC:3.1.4.53] (A)	ko00230:Purine metabolism	Dual 3&apos;,5&apos;-cyclic-AMP and -GMP phosphodiesterase 11A GN=pde11a OS=Takifugu rubripes (Japanese pufferfish) PE=3 SV=1	T	Signal transduction mechanisms	PREDICTED: cAMP-specific 3&apos;,5&apos;-cyclic phosphodiesterase 7B-like isoform X1 [Oreochromis niloticus]
LOC100707454	95	227	5.13679	12.1994	0.00059357	1.19325	up	--	--	Biological Process: protein glycosylation (GO:0006486);; Biological Process: heparan sulfate proteoglycan biosynthetic process (GO:0015012);; Cellular Component: integral component of endoplasmic reticulum membrane (GO:0030176);; Molecular Function: glucuronosyl-N-acetylglucosaminyl-proteoglycan 4-alpha-N-acetylglucosaminyltransferase activity (GO:0050508);; Molecular Function: N-acetylglucosamin…	K02366|0|mze:101486492|exostosin-1c-like; K02366 glucuronyl/N-acetylglucosaminyl transferase EXT1 [EC:2.4.1.224 2.4.1.225] (A)	ko00534:Glycosaminoglycan biosynthesis - heparan sulfate / heparin	Exostosin-1c GN=ext1c OS=Danio rerio (Zebrafish) PE=2 SV=1	W	Extracellular structures	PREDICTED: exostosin-1c-like [Oreochromis niloticus]
LOC100703525	154	399	2.0208	5.4101	4.0241e-06	1.31485	up	--	--	--	--	--	--	S	Function unknown	PREDICTED: transmembrane and coiled-coil domains protein 3-like [Oreochromis niloticus]
enc1	153	50	1.52491	0.514202	5.0914e-06	-1.62978	down	--	--	--	K10462|0|mze:101482515|ectoderm-neural cortex protein 1-like; K10462 kelch-like protein 25/37 (ectoderm-neural cortex protein) (A)	--	Kelch-like protein 25 GN=klhl25 OS=Xenopus tropicalis (Western clawed frog) PE=2 SV=1	T	Signal transduction mechanisms	PREDICTED: ectoderm-neural cortex protein 1-like [Oreochromis niloticus]
angptl4	368	85	5.77144	1.30864	5.10703e-15	-2.1412	down	--	--	Biological Process: response to bacterium (GO:0009617);;	K08767|0|mze:101480624|angiopoietin-related protein 4-like; K08767 angiopoietin-like 4 (A)	ko03320:PPAR signaling pathway	Fibrinogen C domain-containing protein 1 GN=fibcd1 OS=Xenopus tropicalis (Western clawed frog) PE=2 SV=1	R	General function prediction only	PREDICTED: angiopoietin-related protein 4-like [Oreochromis niloticus]
LOC102080781	201	502	15.2142	37.9511	4.6542e-06	1.26421	up	--	--	--	--	--	Tetratricopeptide repeat protein 27 GN=TTC27 OS=Gallus gallus (Chicken) PE=2 SV=1	R	General function prediction only	PREDICTED: tetratricopeptide repeat protein 27-like, partial [Oreochromis niloticus]
LOC100705215	188	38	5.56563	1.11155	3.07243e-12	-2.30501	down	[R]	General function prediction only	--	K15261|0|mze:101464907|poly [ADP-ribose] polymerase 14-like; K15261 poly [ADP-ribose] polymerase 10/14/15 [EC:2.4.2.30] (A)	--	--	K	Transcription	PREDICTED: poly [ADP-ribose] polymerase 14-like [Oreochromis niloticus]
mid1	69	16	0.809706	0.229884	7.3494e-05	-2.04525	down	--	--	Cellular Component: intracellular (GO:0005622);; Molecular Function: zinc ion binding (GO:0008270);;	K08285|0|mze:101466449|midline-1-like; K08285 midline 1 [EC:6.3.2.19] (A)	ko04120:Ubiquitin mediated proteolysis	Fibronectin type III and SPRY domain-containing protein 1 GN=fsd1 OS=Danio rerio (Zebrafish) PE=3 SV=1	O	Posttranslational modification, protein turnover, chaperones	PREDICTED: midline-1-like isoform X1 [Oreochromis niloticus]
LOC102082262	51	9	2.39717	0.311577	0.000148473	-2.3464	down	--	--	--	K06752|4.32174e-34|mze:101472588|DLA class II histocompatibility antigen, DR-1 beta chain-like; K06752 major histocompatibility complex, class II (A)	ko04145:Phagosome;ko04514:Cell adhesion molecules (CAMs);ko04672:Intestinal immune network for IgA production;ko05168:Herpes simplex infection	Class II histocompatibility antigen, B-L beta chain (Fragment) OS=Gallus gallus (Chicken) PE=3 SV=1	--	--	PREDICTED: class II histocompatibility antigen, M beta 1 chain-like isoform X1 [Oreochromis niloticus]
LOC100699417	324	149	3.1886	1.52935	0.000177402	-1.16089	down	--	--	Molecular Function: metal ion binding (GO:0046872);;	K01081|0|mze:101472271|cytosolic purine 5'-nucleotidase-like; K01081 5'-nucleotidase [EC:3.1.3.5] (A)	ko00230:Purine metabolism;ko00240:Pyrimidine metabolism;ko00760:Nicotinate and nicotinamide metabolism	Cytosolic purine 5&apos;-nucleotidase GN=NT5C2 OS=Gallus gallus (Chicken) PE=2 SV=1	F	Nucleotide transport and metabolism	PREDICTED: cytosolic purine 5&apos;-nucleotidase-like isoform X1 [Oreochromis niloticus]
LOC100691388	95	282	16.3076	34.7143	5.65241e-07	1.50414	up	--	--	Cellular Component: nucleosome (GO:0000786);; Molecular Function: DNA binding (GO:0003677);; Cellular Component: nucleus (GO:0005634);; Biological Process: nucleosome assembly (GO:0006334);; Molecular Function: protein heterodimerization activity (GO:0046982);;	K11252|2.21939e-59|dan:Dana_GF18984|GF18984 gene product from transcript GF18984-RA; K11252 histone H2B (A)	--	Histone H2B OS=Rhacophorus schlegelii (Japanese gliding frog) PE=1 SV=3	B	Chromatin structure and dynamics	PREDICTED: histone H2B.3-like [Oryzias latipes]
LOC100691316	285	641	10.9018	19.9007	6.32989e-05	1.1155	up	--	--	Cellular Component: extracellular region (GO:0005576);; Biological Process: iron ion transport (GO:0006826);; Biological Process: cellular iron ion homeostasis (GO:0006879);; Molecular Function: ferric iron binding (GO:0008199);;	K14736|0|mze:101483054|serotransferrin-like; K14736 transferrin (A)	--	Serotransferrin (Precursor) GN=tf OS=Oryzias latipes (Medaka fish) PE=3 SV=1	P	Inorganic ion transport and metabolism	PREDICTED: serotransferrin-like [Oreochromis niloticus]
deptor	324	74	3.444	0.863274	2.10942e-14	-2.15407	down	--	--	Biological Process: intracellular signal transduction (GO:0035556);;	--	--	--	R	General function prediction only	PREDICTED: DEP domain-containing mTOR-interacting protein-like isoform X2 [Oreochromis niloticus]
ezr	1275	641	16.069	7.90262	0.000104766	-1.03948	down	--	--	Cellular Component: ruffle (GO:0001726);; Cellular Component: uropod (GO:0001931);; Cellular Component: nucleolus (GO:0005730);; Cellular Component: cytosol (GO:0005829);; Cellular Component: actin filament (GO:0005884);; Cellular Component: microvillus (GO:0005902);; Cellular Component: focal adhesion (GO:0005925);; Cellular Component: ciliary basal body (GO:0005932);; Biological Process: leukoc…	K08007|0|mze:101480288|ezrin-like; K08007 villin 2 (ezrin) (A)	ko04810:Regulation of actin cytoskeleton	Radixin GN=RDX OS=Gallus gallus (Chicken) PE=2 SV=1	R	General function prediction only	PREDICTED: ezrin-like [Oreochromis niloticus]
LOC100712546	35	118	0.73763	2.58997	5.03384e-05	1.65809	up	--	--	Cellular Component: integral component of membrane (GO:0016021);; Biological Process: transmembrane transport (GO:0055085);;	K15109|0|mze:101469797|mitochondrial carnitine/acylcarnitine carrier protein-like; K15109 solute carrier family 25 (mitochondrial carnitine/acylcarnitine transporter), member 20/29 (A)	--	Solute carrier family 25 member 47-B GN=slc25a47b OS=Danio rerio (Zebrafish) PE=2 SV=1	C	Energy production and conversion	PREDICTED: mitochondrial carnitine/acylcarnitine carrier protein-like [Oreochromis niloticus]
LOC100709109	331	53	16.0918	2.82251	0	-2.65339	down	--	--	--	K06752|0|mze:101475247|h-2 class II histocompatibility antigen, I-E beta chain-like; K06752 major histocompatibility complex, class II (A)	ko04145:Phagosome;ko04514:Cell adhesion molecules (CAMs);ko04672:Intestinal immune network for IgA production;ko05168:Herpes simplex infection	Class II histocompatibility antigen, B-L beta chain (Fragment) OS=Gallus gallus (Chicken) PE=3 SV=1	R	General function prediction only	PREDICTED: SLA class II histocompatibility antigen, DQ haplotype C beta chain-like [Oreochromis niloticus]
LOC100700535	462	237	10.6306	5.78224	0.00112604	-1.00713	down	--	--	Molecular Function: calcium ion binding (GO:0005509);; Molecular Function: calcium-dependent phospholipid binding (GO:0005544);;	K17099|0|mze:101468299|annexin A13-like; K17099 annexin A13 (A)	--	Annexin A5 GN=ANXA5 OS=Gallus gallus (Chicken) PE=1 SV=2	U	Intracellular trafficking, secretion, and vesicular transport	PREDICTED: annexin A13-like [Oreochromis niloticus]
LOC100689998	647	77	4.88855	0.965716	0	-3.09211	down	--	--	--	K05175|0|mze:101488117|gamma-aminobutyric acid receptor subunit alpha-5-like; K05175 gamma-aminobutyric acid receptor subunit alpha (A)	ko04080:Neuroactive ligand-receptor interaction	Gamma-aminobutyric acid receptor subunit alpha-1 (Precursor) GN=GABRA1 OS=Gallus gallus (Chicken) PE=2 SV=1	T	Signal transduction mechanisms	PREDICTED: gamma-aminobutyric acid receptor subunit alpha-5-like [Oreochromis niloticus]
traf4	1324	470	13.3535	4.87281	4.81337e-11	-1.54008	down	--	--	Molecular Function: ubiquitin-protein transferase activity (GO:0004842);; Biological Process: activation of NF-kappaB-inducing kinase activity (GO:0007250);; Molecular Function: zinc ion binding (GO:0008270);; Biological Process: protein ubiquitination (GO:0016567);; Biological Process: regulation of apoptotic process (GO:0042981);; Biological Process: positive regulation of JNK cascade (GO:00463…	K09848|0|mze:101478516|TNF receptor-associated factor 4-like; K09848 TNF receptor-associated factor 4 (A)	--	TNF receptor-associated factor 6 GN=traf6 OS=Danio rerio (Zebrafish) PE=2 SV=2	T	Signal transduction mechanisms	PREDICTED: TNF receptor-associated factor 4 [Oreochromis niloticus]
nrp1	350	143	3.00999	1.04607	4.06407e-06	-1.33031	down	--	--	--	K06724|0|xma:102232491|neuropilin-1a-like; K06724 neuropilin 1 (A)	--	Neuropilin-1a (Precursor) GN=nrp1a OS=Danio rerio (Zebrafish) PE=2 SV=1	T	Signal transduction mechanisms	PREDICTED: neuropilin-1a-like isoform X1 [Oreochromis niloticus]
dusp14	93	298	1.20291	4.11733	3.75853e-08	1.61345	up	[T]	Signal transduction mechanisms	Biological Process: inactivation of MAPK activity (GO:0000188);; Molecular Function: protein tyrosine phosphatase activity (GO:0004725);; Molecular Function: MAP kinase tyrosine/serine/threonine phosphatase activity (GO:0017017);; Biological Process: peptidyl-tyrosine dephosphorylation (GO:0035335);;	K14165|3.83904e-143|mze:101477964|dual specificity protein phosphatase 14-like; K14165 atypical dual specificity phosphatase [EC:3.1.3.16 3.1.3.48] (A)	--	Dual specificity protein phosphatase 1-A OS=Xenopus laevis (African clawed frog) PE=1 SV=1	V	Defense mechanisms	PREDICTED: dual specificity protein phosphatase 14-like [Oreochromis niloticus]
LOC100694563	390	187	4.41855	2.2339	0.000280667	-1.10274	down	[T]	Signal transduction mechanisms	Biological Process: MAPK cascade (GO:0000165);; Molecular Function: protein serine/threonine phosphatase activity (GO:0004722);; Biological Process: protein dephosphorylation (GO:0006470);; Biological Process: transmembrane receptor protein serine/threonine kinase signaling pathway (GO:0007178);; Molecular Function: metal ion binding (GO:0046872);;	K17506|0|mze:101471328|protein phosphatase 1L-like; K17506 protein phosphatase 1L [EC:3.1.3.16] (A)	--	Protein phosphatase 1K, mitochondrial (Precursor) GN=ppm1k OS=Xenopus laevis (African clawed frog) PE=2 SV=1	T	Signal transduction mechanisms	PREDICTED: protein phosphatase 1L [Oreochromis niloticus]
LOC100712433	688	298	6.1606	2.76331	1.65782e-06	-1.25165	down	--	--	--	K14943|0|mze:101483053|muscleblind-like protein 1-like; K14943 muscleblind (A)	--	Muscleblind-like protein 1 GN=MBNL1 OS=Gallus gallus (Chicken) PE=2 SV=1	A	RNA processing and modification	PREDICTED: muscleblind-like protein 1-like isoform X10 [Haplochromis burtoni]
pparg	183	63	3.01572	1.09172	3.41363e-06	-1.56204	down	--	--	Molecular Function: steroid hormone receptor activity (GO:0003707);; Molecular Function: ligand-activated sequence-specific DNA binding RNA polymerase II transcription factor activity (GO:0004879);; Cellular Component: nucleus (GO:0005634);; Biological Process: regulation of transcription, DNA-templated (GO:0006355);; Molecular Function: zinc ion binding (GO:0008270);; Biological Process: intrace…	K08530|0|mze:101485991|peroxisome proliferator-activated receptor gamma-like; K08530 peroxisome proliferator-activated receptor gamma (A)	ko03320:PPAR signaling pathway	Peroxisome proliferator-activated receptor gamma GN=pparg OS=Xenopus laevis (African clawed frog) PE=1 SV=1	K	Transcription	PREDICTED: peroxisome proliferator-activated receptor gamma-like isoform X2 [Oreochromis niloticus]
LOC100696317	12753	27539	1770.08	3605.14	9.47535e-05	1.06119	up	--	--	Cellular Component: nucleosome (GO:0000786);; Molecular Function: DNA binding (GO:0003677);; Cellular Component: nucleus (GO:0005634);; Biological Process: nucleosome assembly (GO:0006334);; Molecular Function: protein heterodimerization activity (GO:0046982);;	K11252|1.23331e-59|mze:101468538|histone H2B-like; K11252 histone H2B (A)	--	Histone H2B OS=Rhacophorus schlegelii (Japanese gliding frog) PE=1 SV=3	B	Chromatin structure and dynamics	PREDICTED: histone H2B-like [Oreochromis niloticus]
LOC106098657	75	19	13.2848	3.66065	9.00105e-05	-1.93712	down	--	--	--	--	--	--	--	--	PREDICTED: lymphocyte antigen 6G-like [Oreochromis niloticus]
LOC100690188	39	7	0.309526	0.111223	0.00323018	-2.27135	down	[TZDR]	--	Molecular Function: calcium ion binding (GO:0005509);; Cellular Component: intracellular (GO:0005622);;	--	--	Visinin-like protein 1 GN=VSNL1 OS=Gallus gallus (Chicken) PE=2 SV=2	T	Signal transduction mechanisms	PREDICTED: hippocalcin-like protein 4-like [Oreochromis niloticus]
mep1b	91	36	1.29454	0.532701	0.00862024	-1.34613	down	--	--	--	K08606|0|mze:101470468|meprin A subunit beta-like; K08606 meprin B [EC:3.4.24.63] (A)	--	Low choriolytic enzyme (Precursor) GN=lce OS=Oryzias latipes (Medaka fish) PE=1 SV=1	O	Posttranslational modification, protein turnover, chaperones	PREDICTED: meprin A subunit beta-like [Oreochromis niloticus]
LOC100712391	360	48	3.62383	0.484671	0	-2.91224	down	--	--	Molecular Function: sodium:potassium-exchanging ATPase activity (GO:0005391);; Molecular Function: ATP binding (GO:0005524);; Cellular Component: endoplasmic reticulum (GO:0005783);; Cellular Component: Golgi apparatus (GO:0005794);; Cellular Component: plasma membrane (GO:0005886);; Biological Process: ATP biosynthetic process (GO:0006754);; Biological Process: potassium ion transport (GO:000681…	K01539|0|mze:101473612|sodium/potassium-transporting ATPase subunit alpha-3-like; K01539 sodium/potassium-transporting ATPase subunit alpha [EC:3.6.3.9] (A)	ko04260:Cardiac muscle contraction;ko04261:Adrenergic signaling in cardiomyocytes	Sodium/potassium-transporting ATPase subunit alpha-3 GN=atp1a3 OS=Oreochromis mossambicus (Mozambique tilapia) PE=2 SV=1	P	Inorganic ion transport and metabolism	PREDICTED: sodium/potassium-transporting ATPase subunit alpha-3-like isoform X1 [Oreochromis niloticus]
jph3	75	185	0.509713	1.26969	0.000853334	1.23499	up	--	--	--	--	--	Radial spoke head 10 homolog B GN=rsph10b OS=Danio rerio (Zebrafish) PE=2 SV=1	R	General function prediction only	PREDICTED: junctophilin-3-like isoform X2 [Oreochromis niloticus]
cryaa	2746	5745	126.446	257.828	0.00015544	1.01518	up	--	--	Biological Process: eye development (GO:0001654);; Molecular Function: structural constituent of eye lens (GO:0005212);; Biological Process: visual perception (GO:0007601);; Molecular Function: metal ion binding (GO:0046872);; Molecular Function: unfolded protein binding (GO:0051082);;	K09541|8.40151e-115|mze:101471510|alpha-crystallin A chain-like; K09541 crystallin, alpha A (A)	ko04141:Protein processing in endoplasmic reticulum	Alpha-crystallin A chain GN=cryaa OS=Astyanax fasciatus (Blind cave fish) PE=3 SV=1	O	Posttranslational modification, protein turnover, chaperones	PREDICTED: alpha-crystallin A chain-like isoform X1 [Oreochromis niloticus]
LOC100693466	14862	4078	235.65	63.0887	0	-1.9146	down	--	--	Molecular Function: calcium ion binding (GO:0005509);; Cellular Component: proteinaceous extracellular matrix (GO:0005578);; Cellular Component: extracellular space (GO:0005615);; Biological Process: signal transduction (GO:0007165);;	--	--	SPARC (Precursor) GN=SPARC OS=Coturnix coturnix japonica (Japanese quail) PE=2 SV=1	W	Extracellular structures	PREDICTED: SPARC-like protein 1-like [Oreochromis niloticus]
lrrc75b	49	4	0.641769	0.0595025	8.9006e-07	-3.19739	down	--	--	--	--	--	--	S	Function unknown	PREDICTED: leucine-rich repeat-containing protein FAM211B-like [Oreochromis niloticus]
LOC100702990	104	41	2.08894	0.837741	0.00351569	-1.35594	down	--	--	Cellular Component: membrane (GO:0016020);;	--	--	Serine incorporator 5 GN=serinc5 OS=Danio rerio (Zebrafish) PE=2 SV=1	S	Function unknown	PREDICTED: serine incorporator 3-like [Oreochromis niloticus]
LOC100707625	357	173	7.063	3.49071	0.000506608	-1.08696	down	--	--	Biological Process: cilium assembly (GO:0042384);;	--	--	--	S	Function unknown	PREDICTED: coiled-coil domain-containing protein 28B-like isoform X1 [Oreochromis niloticus]
LOC100697533	478	176	8.03698	3.14842	2.16486e-08	-1.4818	down	--	--	Biological Process: nuclear-transcribed mRNA catabolic process, nonsense-mediated decay (GO:0000184);; Cellular Component: cytoplasmic mRNA processing body (GO:0000932);; Cellular Component: nucleus (GO:0005634);; Biological Process: transcription, DNA-templated (GO:0006351);;	K18751|1.2126e-84|mze:101487357|proline-rich nuclear receptor coactivator 2-like; K18751 proline-rich nuclear receptor coactivator 2 (A)	--	Proline-rich nuclear receptor coactivator 2 GN=pnrc2 OS=Salmo salar (Atlantic salmon) PE=2 SV=1	K	Transcription	PREDICTED: proline-rich nuclear receptor coactivator 2-like [Oreochromis niloticus]
sh3pxd2a	277	106	2.68088	1.00676	2.36572e-06	-1.42063	down	--	--	--	--	--	SH3 and PX domain-containing protein 2A GN=sh3pxd2a OS=Danio rerio (Zebrafish) PE=3 SV=2	T	Signal transduction mechanisms	PREDICTED: SH3 and PX domain-containing protein 2A-like isoform X1 [Oreochromis niloticus]
fam161b	6	85	0.13543	1.56012	1.71652e-11	3.45208	up	--	--	--	--	--	Protein FAM161A GN=fam161a OS=Xenopus laevis (African clawed frog) PE=2 SV=1	S	Function unknown	PREDICTED: protein FAM161B-like isoform X1 [Oreochromis niloticus]
LOC100708596	100	22	1.55814	0.34062	3.39423e-07	-2.14922	down	[T]	Signal transduction mechanisms	--	--	--	POC1 centriolar protein homolog A {ECO:0000250|UniProtKB:Q8NBT0} OS=Danio rerio (Zebrafish) PE=2 SV=1	S	Function unknown	PREDICTED: sperm-associated antigen 16 protein-like [Oreochromis niloticus]
calcrl	66	22	1.26214	0.493879	0.0084135	-1.56182	down	--	--	Biological Process: angiogenesis (GO:0001525);; Biological Process: somitogenesis (GO:0001756);; Molecular Function: calcitonin receptor activity (GO:0004948);; Cellular Component: plasma membrane (GO:0005886);; Biological Process: G-protein coupled receptor signaling pathway (GO:0007186);; Cellular Component: integral component of membrane (GO:0016021);; Biological Process: artery morphogenesis …	K04577|0|mze:101471889|calcitonin gene-related peptide type 1 receptor-like; K04577 calcitonin receptor-like (A)	ko04080:Neuroactive ligand-receptor interaction;ko04270:Vascular smooth muscle contraction	Calcitonin gene-related peptide type 1 receptor (Precursor) GN=calcrl OS=Paralichthys olivaceus (Bastard halibut) PE=2 SV=1	T	Signal transduction mechanisms	PREDICTED: calcitonin gene-related peptide type 1 receptor-like [Oreochromis niloticus]
ppox	359	757	9.04691	19.2671	0.000340875	1.02357	up	[H]	Coenzyme transport and metabolism	Molecular Function: oxygen-dependent protoporphyrinogen oxidase activity (GO:0004729);; Biological Process: porphyrin-containing compound biosynthetic process (GO:0006779);; Biological Process: oxidation-reduction process (GO:0055114);;	K00231|0|mze:101474943|protoporphyrinogen oxidase-like; K00231 oxygen-dependent protoporphyrinogen oxidase [EC:1.3.3.4] (A)	ko00860:Porphyrin and chlorophyll metabolism	--	H	Coenzyme transport and metabolism	PREDICTED: protoporphyrinogen oxidase-like [Oreochromis niloticus]
kcnab1	833	140	9.01573	1.50525	0	-2.60755	down	[C]	Energy production and conversion	Molecular Function: voltage-gated potassium channel activity (GO:0005249);; Cellular Component: cytoplasm (GO:0005737);; Biological Process: potassium ion transport (GO:0006813);; Cellular Component: integral component of membrane (GO:0016021);; Biological Process: transmembrane transport (GO:0055085);;	K04882|0|mze:101486818|voltage-gated potassium channel subunit beta-1-like; K04882 potassium voltage-gated channel Shaker-related subfamily A, beta member 1 (A)	--	Voltage-gated potassium channel subunit beta-1 GN=KCNAB1 OS=Gallus gallus (Chicken) PE=2 SV=1	P	Inorganic ion transport and metabolism	PREDICTED: voltage-gated potassium channel subunit beta-1-like isoform X1 [Pundamilia nyererei]
LOC100708138	26	1	2.54167	0.0236909	0.00105596	-3.39819	down	[R]	General function prediction only	Biological Process: purine nucleobase metabolic process (GO:0006144);; Biological Process: transport (GO:0006810);; Molecular Function: hydroxyisourate hydrolase activity (GO:0033971);;	K07127|1.14966e-79|mze:101485783|5-hydroxyisourate hydrolase-like; K07127 5-hydroxyisourate hydrolase [EC:3.5.2.17] (A)	ko00230:Purine metabolism	5-hydroxyisourate hydrolase GN=urah OS=Danio rerio (Zebrafish) PE=1 SV=1	F	Nucleotide transport and metabolism	PREDICTED: 5-hydroxyisourate hydrolase-like isoform X1 [Oreochromis niloticus]
vegfa	130	45	1.43498	0.662887	6.9622e-05	-1.54419	down	--	--	Molecular Function: growth factor activity (GO:0008083);; Cellular Component: membrane (GO:0016020);; Biological Process: positive regulation of cell division (GO:0051781);;	K05448|3.21949e-105|ola:100125510|vascular endothelial growth factor A; K05448 vascular endothelial growth factor A (A)	ko04060:Cytokine-cytokine receptor interaction;ko04150:mTOR signaling pathway;ko04370:VEGF signaling pathway;ko04510:Focal adhesion	Vascular endothelial growth factor A-A (Precursor) GN=vegfaa OS=Danio rerio (Zebrafish) PE=1 SV=1	T	Signal transduction mechanisms	PREDICTED: vascular endothelial growth factor A-A-like isoform X1 [Haplochromis burtoni]
cacnb1	574	249	7.06048	2.95899	3.20369e-06	-1.24852	down	--	--	--	K04862|0|mze:101472736|voltage-dependent L-type calcium channel subunit beta-1-like; K04862 voltage-dependent calcium channel beta-1 (A)	ko04010:MAPK signaling pathway;ko04260:Cardiac muscle contraction;ko04261:Adrenergic signaling in cardiomyocytes	--	T	Signal transduction mechanisms	PREDICTED: voltage-dependent L-type calcium channel subunit beta-1-like isoform X1 [Maylandia zebra]
sorcs2	187	80	1.58158	0.624972	0.000446881	-1.25646	down	--	--	--	--	--	Sortilin-related receptor (Fragment) GN=SORL1 OS=Gallus gallus (Chicken) PE=2 SV=1	T	Signal transduction mechanisms	PREDICTED: VPS10 domain-containing receptor SorCS2-like isoform X1 [Maylandia zebra]
tenm2	125	283	0.506567	1.14827	0.000793383	1.11923	up	[M]	Cell wall/membrane/envelope biogenesis	Molecular Function: receptor binding (GO:0005102);; Cellular Component: integral component of plasma membrane (GO:0005887);; Biological Process: signal transduction (GO:0007165);;	--	--	Ten-2 intracellular domain GN=TENM2 OS=Gallus gallus (Chicken) PE=1 SV=1	T	Signal transduction mechanisms	PREDICTED: teneurin-2 isoform X1 [Oreochromis niloticus]
LOC100700083	378	127	7.94059	2.40894	3.99877e-09	-1.60988	down	[O]	Posttranslational modification, protein turnover, chaperones	--	K03283|0|mze:101481563|heat shock 70 kDa protein 1-like; K03283 heat shock 70kDa protein 1/8 (A)	ko03040:Spliceosome;ko04010:MAPK signaling pathway;ko04141:Protein processing in endoplasmic reticulum;ko04144:Endocytosis	Heat shock 70 kDa protein 1 OS=Oryzias latipes (Medaka fish) PE=3 SV=1	O	Posttranslational modification, protein turnover, chaperones	PREDICTED: heat shock 70 kDa protein 1-like, partial [Oreochromis niloticus]
gpc5	233	63	2.78103	0.926167	4.38328e-10	-1.90775	down	--	--	Cellular Component: proteinaceous extracellular matrix (GO:0005578);; Cellular Component: plasma membrane (GO:0005886);; Cellular Component: anchored component of membrane (GO:0031225);; Molecular Function: heparan sulfate proteoglycan binding (GO:0043395);;	K08111|0|mze:101478083|glypican-5-like; K08111 glypican 5 (A)	--	Secreted glypican-1 (Precursor) GN=GPC1 OS=Gallus gallus (Chicken) PE=2 SV=1	T	Signal transduction mechanisms	PREDICTED: glypican-5-like [Oreochromis niloticus]
rbpms	514	259	7.54457	4.1275	0.000522337	-1.0333	down	--	--	--	--	--	RNA-binding protein with multiple splicing GN=RBPMS OS=Gallus gallus (Chicken) PE=2 SV=1	A	RNA processing and modification	PREDICTED: RNA-binding protein with multiple splicing-like [Xiphophorus maculatus]
LOC100712270	59	158	0.702637	2.00388	0.000404374	1.3474	up	--	--	Biological Process: regulation of cell growth (GO:0001558);; Molecular Function: insulin-like growth factor binding (GO:0005520);; Cellular Component: extracellular region (GO:0005576);;	--	--	Insulin-like growth factor-binding protein 5 (Precursor) OS=Xenopus laevis (African clawed frog) PE=2 SV=1	T	Signal transduction mechanisms	PREDICTED: insulin-like growth factor-binding protein 5-like [Oreochromis niloticus]
gmfb	388	155	5.36539	2.35979	1.15419e-06	-1.36342	down	--	--	Molecular Function: actin binding (GO:0003779);; Cellular Component: intracellular (GO:0005622);;	--	--	--	W	Extracellular structures	PREDICTED: glia maturation factor beta-like [Oreochromis niloticus]
fshb	37	1	3.76341	0.209465	2.21884e-06	-3.88128	down	--	--	Molecular Function: hormone activity (GO:0005179);; Cellular Component: extracellular region (GO:0005576);;	K05250|4.10058e-64|mze:101487096|gonadotropin subunit beta-1-like; K05250 follicle stimulating hormone (A)	ko04080:Neuroactive ligand-receptor interaction;ko04912:GnRH signaling pathway	Gonadotropin subunit beta-1 (Precursor) GN=cgba OS=Trichopodus trichopterus (Three spot gourami) PE=3 SV=1	R	General function prediction only	FSH beta subunit precursor [Oreochromis niloticus]
sfrp1	2915	1462	64.3204	33.876	6.17274e-05	-1.04404	down	--	--	Cellular Component: extracellular region (GO:0005576);; Biological Process: multicellular organismal development (GO:0007275);; Biological Process: Wnt signaling pathway (GO:0016055);;	K02166|0|mze:101487708|secreted frizzled-related protein 1-like; K02166 secreted frizzled-related protein 1 (A)	ko04310:Wnt signaling pathway	Secreted frizzled-related protein 1 (Precursor) GN=SFRP1 OS=Gallus gallus (Chicken) PE=2 SV=1	T	Signal transduction mechanisms	PREDICTED: secreted frizzled-related protein 1-like [Oreochromis niloticus]
LOC102082866	172	48	10.0348	2.70569	3.89241e-08	-1.85385	down	--	--	--	--	--	--	R	General function prediction only	PREDICTED: uncharacterized protein LOC102082866 isoform X5 [Oreochromis niloticus]
adcy8	119	297	0.829578	2.19856	5.22971e-05	1.2585	up	[T]	Signal transduction mechanisms	Molecular Function: nucleotide binding (GO:0000166);; Molecular Function: adenylate cyclase activity (GO:0004016);; Cellular Component: intracellular (GO:0005622);; Biological Process: cAMP biosynthetic process (GO:0006171);; Biological Process: long-term memory (GO:0007616);; Cellular Component: integral component of membrane (GO:0016021);; Biological Process: axon midline choice point recogniti…	K08048|0|mze:101465620|adenylate cyclase type 8-like; K08048 adenylate cyclase 8 [EC:4.6.1.1] (A)	ko00230:Purine metabolism;ko04020:Calcium signaling pathway;ko04114:Oocyte meiosis;ko04261:Adrenergic signaling in cardiomyocytes;ko04270:Vascular smooth muscle contraction;ko04540:Gap junction;ko04912:GnRH signaling pathway;ko04914:Progesterone-mediated oocyte maturation;ko04916:Melanogenesis	Adenylate cyclase type 9 GN=ADCY9 OS=Gallus gallus (Chicken) PE=2 SV=1	C	Energy production and conversion	PREDICTED: adenylate cyclase type 8-like isoform X1 [Oreochromis niloticus]
esam	378	137	4.2134	1.67859	5.4229e-08	-1.50193	down	--	--	Biological Process: platelet aggregation (GO:0070527);;	K06787|0|mze:101484102|endothelial cell-selective adhesion molecule-like; K06787 endothelial cell adhesion molecule (A)	ko04514:Cell adhesion molecules (CAMs)	V-set and immunoglobulin domain-containing protein 1 (Precursor) GN=VSIG1 OS=Gallus gallus (Chicken) PE=2 SV=1	T	Signal transduction mechanisms	PREDICTED: endothelial cell-selective adhesion molecule-like [Oreochromis niloticus]
cfap44	89	31	0.961126	0.355252	0.00160171	-1.51984	down	[R]	General function prediction only	--	--	--	--	S	Function unknown	PREDICTED: uncharacterized protein LOC100696159 isoform X2 [Oreochromis niloticus]
LOC102080300	93	30	0.626885	0.217101	0.000354672	-1.62692	down	--	--	--	--	--	Rho GTPase-activating protein 32 GN=arhgap32 OS=Xenopus laevis (African clawed frog) PE=2 SV=1	T	Signal transduction mechanisms	PREDICTED: rho GTPase-activating protein 32-like isoform X1 [Haplochromis burtoni]
LOC100691005	8	63	0.282348	2.01583	1.52677e-06	2.6951	up	[MI]	--	Molecular Function: catalytic activity (GO:0003824);; Biological Process: biosynthetic process (GO:0009058);;	--	--	--	I	Lipid transport and metabolism	PREDICTED: choline-phosphate cytidylyltransferase B-like [Oreochromis niloticus]
LOC100699645	360	106	5.10998	2.0118	5.64609e-11	-1.79676	down	--	--	Molecular Function: protein phosphatase inhibitor activity (GO:0004864);; Biological Process: signal transduction (GO:0007165);;	K15494|1.08927e-117|mze:101463831|protein phosphatase 1 regulatory subunit 1B-like; K15494 protein phosphatase 1 regulatory subunit 1B (A)	--	--	T	Signal transduction mechanisms	PREDICTED: protein phosphatase 1 regulatory subunit 1B-like isoform X2 [Oreochromis niloticus]
arl2	266	562	15.9689	33.9829	0.00058528	1.02522	up	[R]	General function prediction only	Molecular Function: GTP binding (GO:0005525);; Cellular Component: intracellular (GO:0005622);; Biological Process: small GTPase mediated signal transduction (GO:0007264);;	K07943|1.76421e-116|mze:101481656|ADP-ribosylation factor-like protein 2-like; K07943 ADP-ribosylation factor-like protein 2 (A)	--	ADP-ribosylation factor-like protein 3 GN=arl3 OS=Xenopus laevis (African clawed frog) PE=2 SV=1	U	Intracellular trafficking, secretion, and vesicular transport	PREDICTED: ADP-ribosylation factor-like protein 2-like isoform 1 [Oreochromis niloticus]
LOC102082699	41	9	1.60037	0.333232	0.00829008	-2.04256	down	--	--	--	--	--	--	R	General function prediction only	PREDICTED: basement membrane-specific heparan sulfate proteoglycan core protein-like [Oreochromis niloticus]
[truncated: 115 more rows]

## Sheet: LD_vs_LL.DEG.final
#ID	T03_Count	T01_Count	T03_FPKM	T01_FPKM	FDR	log2FC	regulated	COG_class	COG_class_annotation	GO_annotation	KEGG_annotation	KEGG_pathway	Swiss-Prot_annotation	eggNOG_class	eggNOG_class_annotation	NR_annotation
[truncated: 964 more rows]

[truncated: 1 more sheets: LD_vs_DD.DEG.final]
